# Supplementary material for: Comprehensive Characterization of Triterpene Saponins in Rhizoma Panacis Japonici by Offline Two-Dimensional Liquid Chromatography Coupled to Quadrupole Time-of-Flight Mass Spectrometry
Source: MDPI journal article supplement (doi:10.3390/molecules29061295), 2024-03-14

## Figure legend

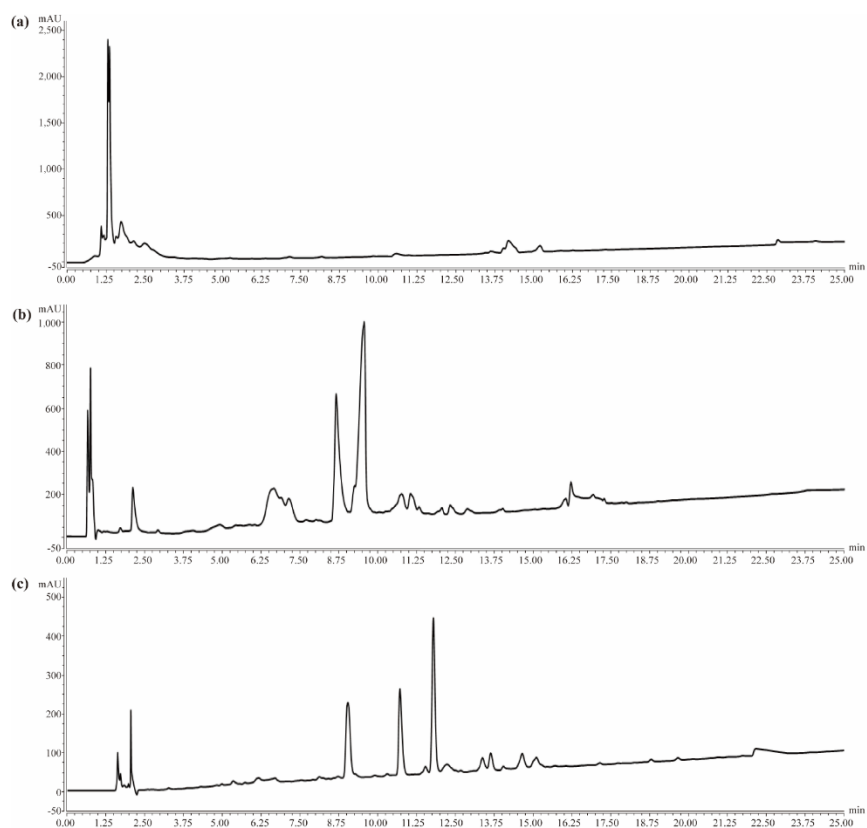

**Figure S1.** 1D HILIC chromatograms (203 nm) of RPJ extract with different columns: (a) Atlantis HILIC silica column (2.1 × 150 mm, 3 μm), (b) BEH Amide column (2.1 × 100 mm, 1.7 μm), and (c) Xbridge Amide column (2.1 × 150 mm, 3.5 μm).

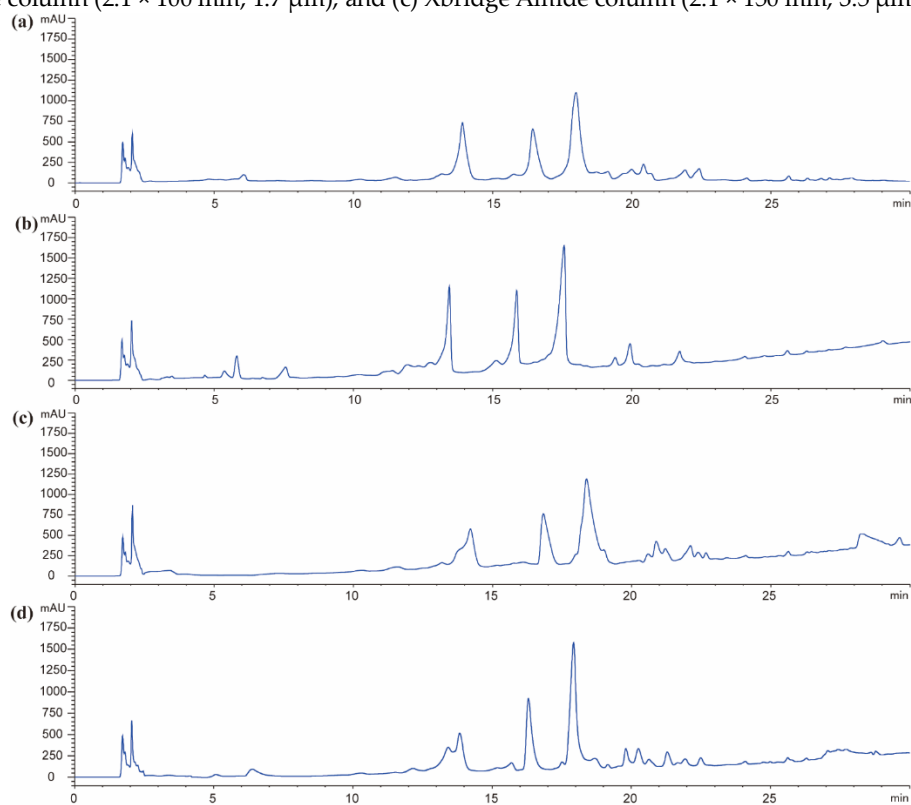

**Figure S2.** 1D HILIC chromatograms (203 nm) of RPJ extract with different additives in the mobile phase: (a) Water; (b) 0.1% trifluoroacetic acid (TFA); (c) 0.1 M ammonium formate (AF); (d) 0.1% formic acid (FA).

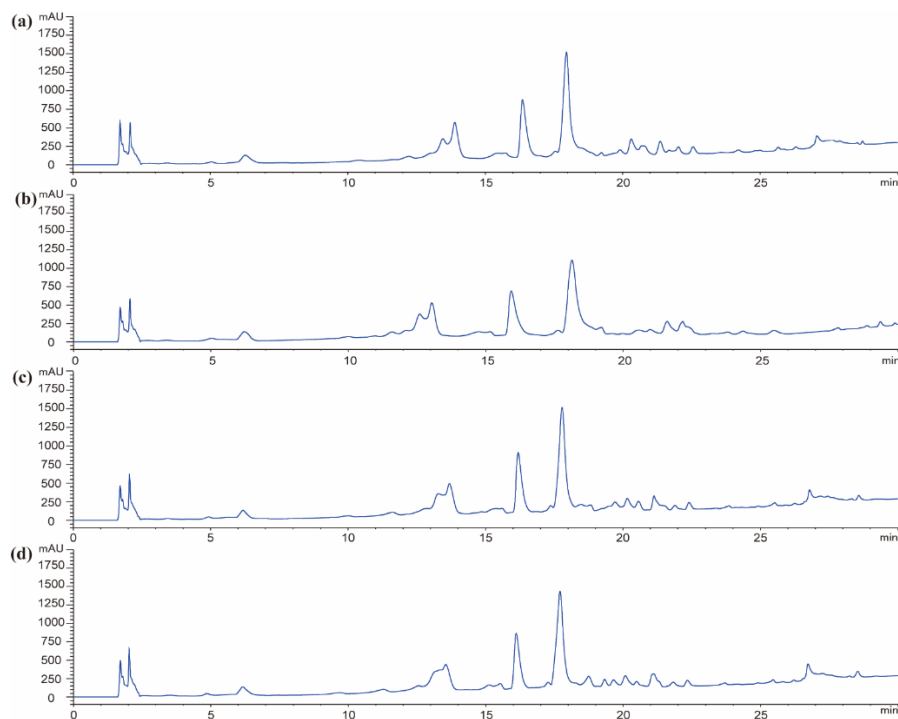

**Figure S3.** 1D HILIC chromatograms (203 nm) of RPJ extract with XBridge Amide column at different column temperature: (a) 25 °C, (b) 30 °C, (c) 35 °C and (d) 40 °C.

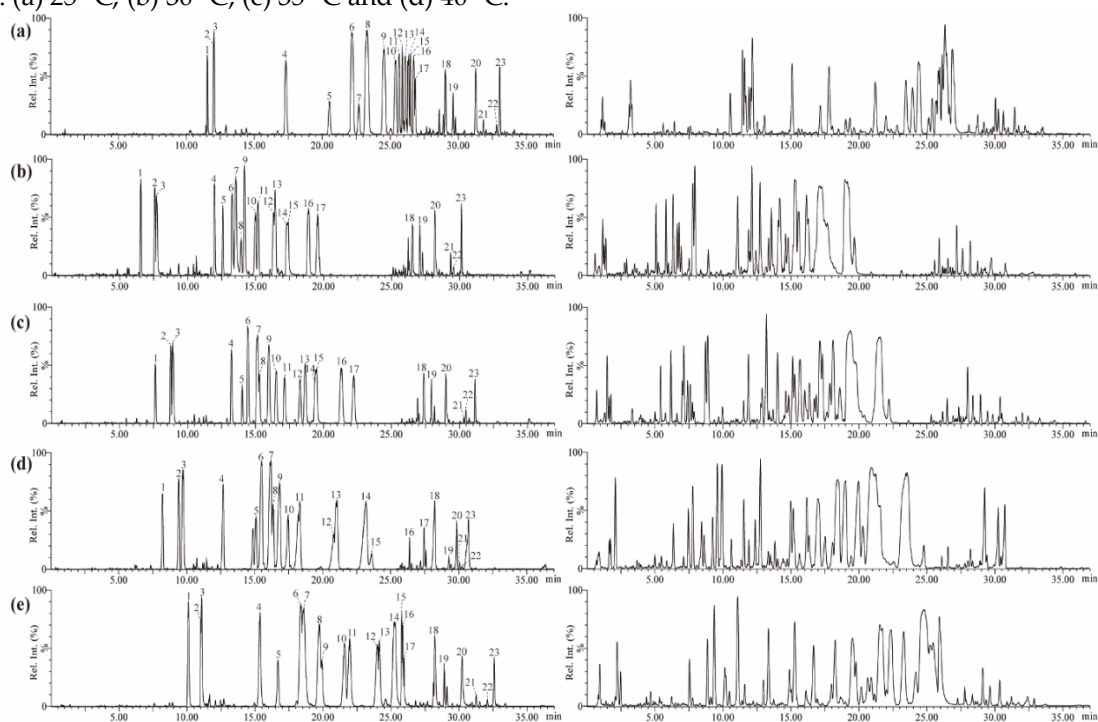

**Figure S4.** Base peak ion (BPI) chromatograms of 23 reference saponins (left) and RPJ extract (right) with different RP-UPLC columns at 40 °C. (a) Scepter C18-120 (2.1 × 150 mm, 1.9 μm); (b) COR-TECS C18 column (2.1 × 100 mm, 1.6 μm); (c) BEH C18

column (2.1 × 100 mm, 1.7 μm); (d) BEH Shield RP18 column (2.1 × 100 mm, 1.7 μm); (e) HSS T3 column (2.1 × 100 mm, 1.8 μm).

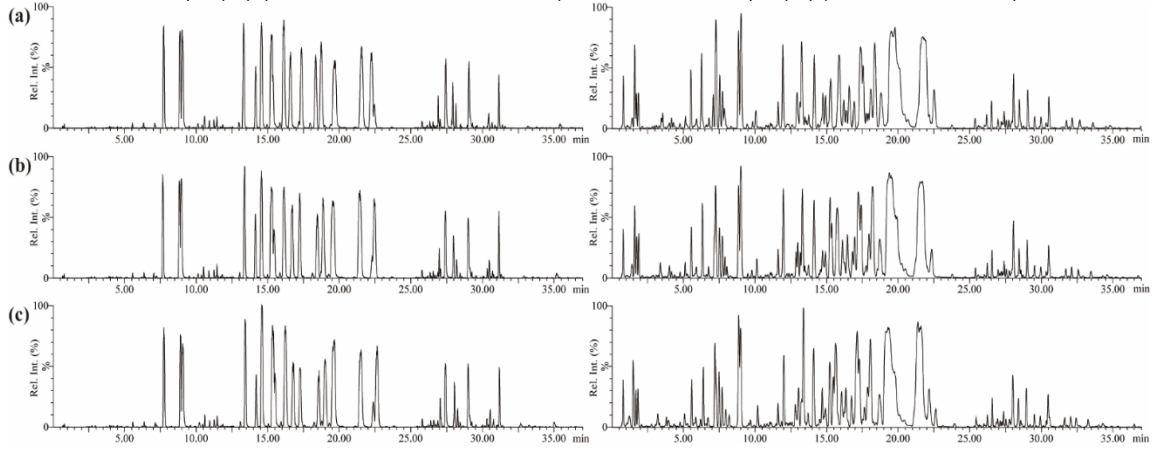

**Figure S5.** Base peak ion (BPI) chromatograms of 23 reference saponins (left) and RPJ (right) extract with BEH C18 column at different column temperature: (a) 30 °C, (b) 35 °C and (c) 40 °C.

$$t'_{R, \text{norm}(i)} = \frac{t_i - t_D}{t_G - t_D} \quad (\text{S1})$$

$$S_{Z_-} = \sigma\{1_{t'_{R, \text{norm}(i)}} - 2_{t'_{R, \text{norm}(i)}}\} \quad (\text{S2})$$

$$S_{Z_+} = \sigma\{2_{t'_{R, \text{norm}(i)}} - (1 - 1_{t'_{R, \text{norm}(i)}})\} \quad (\text{S3})$$

$$S_{Z_1} = \sigma\{1_{t'_{R, \text{norm}(i)}} - 0.5\} \quad (\text{S4})$$

$$S_{Z_2} = \sigma\{2_{t'_{R, \text{norm}(i)}} - 0.5\} \quad (\text{S5})$$

$$Z_- = |1 - 2.5|S_{Z_-} - 1|| \quad (\text{S6})$$

$$Z_+ = |1 - 2.5|S_{Z_+} - 1|| \quad (\text{S7})$$

$$Z_1 = 1 - |2.5 \times S_{Z_1} \times \sqrt{2} - 1| \quad (\text{S8})$$

$$Z_2 = 1 - |2.5 \times S_{Z_2} \times \sqrt{2} - 1| \quad (\text{S9})$$

$$A_O = \sqrt{Z \cdot Z_+ \cdot Z_1 \cdot Z_2} \quad (\text{S10})$$

$$n_{\text{grad}} = t_G / w_b \quad (\text{S11})$$

$$n_{c, 2D} = 1_{n_c} \times 2_{n_c} \quad (\text{S12})$$

$$n'_{c, 2D} = \frac{1_{n_c} \times 2_{n_c}}{\sqrt{1 + 3.35 \left( \frac{2_{t_c} 1_{n_c}}{1_{t_g}} \right)^2}} \quad (\text{S13})$$

**Formula (S1).** Asterisk equations for calculating orthogonality and peak capacity of 2D LC system.

**Table S1.** Intra-day precision of the 1D separation (n = 6).

| $t_R$<br>(min) | 1      | 2      | 3      | 4      | 5      | 6      | RSD<br>(%) |
|----------------|--------|--------|--------|--------|--------|--------|------------|
| 8.44           | 774.9  | 761.6  | 766.2  | 751.1  | 755.3  | 785.3  | 1.66       |
| 10.79          | 1455.6 | 1470.5 | 1465.4 | 1459.3 | 1496.1 | 1460.7 | 1.00       |
| 12.88          | 1734.8 | 1728.3 | 1656.6 | 1737.5 | 1659.6 | 1646   | 2.59       |
| 18.48          | 1125.9 | 1125.9 | 1142.3 | 1121.9 | 1104.2 | 1134.1 | 1.14       |
| 20.04          | 5125.8 | 5196.6 | 5136.7 | 5174   | 5180.2 | 5164   | 0.52       |

**Table S2.** Inter-day precision of the 1D separation (n = 3).

| $t_R$<br>(min) | Day1   |        |        | Day2   |        |        | Day3   |        |        | RSD<br>(%) |
|----------------|--------|--------|--------|--------|--------|--------|--------|--------|--------|------------|
|                | 1      | 2      | 3      | 1      | 2      | 3      | 1      | 2      | 3      |            |
| 8.44           | 755.3  | 761.6  | 751.1  | 773.1  | 788.6  | 777.6  | 741.9  | 741.8  | 744    | 2.24       |
| 10.79          | 1496.1 | 1465.4 | 1470.5 | 1495.1 | 1472.2 | 1585.7 | 1508.8 | 1516.4 | 1535.5 | 2.53       |
| 12.88          | 1656.6 | 1646   | 1659.6 | 1632   | 1659.2 | 1643.2 | 1644.7 | 1629.4 | 1623.9 | 0.80       |
| 18.48          | 1125.9 | 1134.1 | 1142.3 | 1169.8 | 1170.1 | 1165   | 1171.9 | 1188.6 | 1171.7 | 1.79       |
| 20.04          | 5180.2 | 5164   | 5174   | 5165.1 | 5190.1 | 5174   | 5101.1 | 5106.9 | 5105.6 | 0.70       |

**Table S3.** Intra-day precision of the 2D separation (n = 6).

| Compound | $t_R$ (min) | $m/z$    | 1        | 2        | 3        | 4        | 5        | 6        | RSD (%) |
|----------|-------------|----------|----------|----------|----------|----------|----------|----------|---------|
| G-Rh1    | 15.44       | 637.4316 | 2.14E+06 | 2.06E+06 | 2.02E+06 | 2.08E+06 | 2.01E+06 | 1.94E+06 | 3.34    |
| CS-IVa   | 21.33       | 793.4374 | 1.94E+07 | 2.00E+07 | 1.89E+07 | 1.93E+07 | 1.93E+07 | 1.98E+07 | 2.02    |
| CS-IV    | 19.44       | 925.4797 | 1.53E+07 | 1.53E+07 | 1.59E+07 | 1.61E+07 | 1.48E+07 | 1.45E+07 | 4.01    |
| CS-V     | 17.14       | 955.4903 | 1.24E+07 | 1.18E+07 | 1.16E+07 | 1.22E+07 | 1.22E+07 | 1.24E+07 | 2.72    |
| G-Re     | 9.18        | 945.5423 | 1.59E+07 | 1.72E+07 | 1.56E+07 | 1.70E+07 | 1.66E+07 | 1.59E+07 | 4.03    |

**Table S4.** Inter-day precision of the 2D separation (n = 3).

| Compound | $t_R$<br>(min) | $m/z$    | Day1     |          |          | Day2     |          |          | Day3     |          |          | RSD (%) |
|----------|----------------|----------|----------|----------|----------|----------|----------|----------|----------|----------|----------|---------|
|          |                |          | 1        | 2        | 3        | 1        | 2        | 3        | 1        | 2        | 3        |         |
| G-Rh1    | 15.44          | 637.4316 | 2.01E+06 | 1.94E+06 | 1.81E+06 | 2.02E+06 | 2.01E+06 | 1.94E+06 | 1.99E+06 | 2.15E+06 | 2.02E+06 | 4.55    |
| CS-IVa   | 21.33          | 793.4374 | 1.90E+07 | 1.80E+07 | 1.75E+07 | 1.89E+07 | 1.93E+07 | 1.93E+07 | 2.02E+07 | 1.92E+07 | 1.93E+07 | 4.17    |
| CS-IV    | 19.44          | 925.4797 | 1.61E+07 | 1.79E+07 | 1.51E+07 | 1.53E+07 | 1.53E+07 | 1.59E+07 | 1.63E+07 | 1.65E+07 | 1.67E+07 | 5.42    |
| CS- V    | 17.14          | 955.4903 | 1.19E+07 | 1.22E+07 | 1.20E+07 | 1.22E+07 | 1.22E+07 | 1.24E+07 | 1.31E+07 | 1.37E+07 | 1.31E+07 | 4.92    |
| G-Re     | 9.18           | 945.5423 | 1.86E+07 | 1.90E+07 | 1.81E+07 | 1.72E+07 | 1.70E+07 | 1.66E+07 | 1.99E+07 | 1.97E+07 | 1.87E+07 | 6.43    |

**Table S5.** Repeatability of the offline 2D LC-MS system (n = 6).

| Compound | $t_R$ (min) | $m/z$    | 1        | 2        | 3        | 4        | 5        | 6        | RSD (%) |
|----------|-------------|----------|----------|----------|----------|----------|----------|----------|---------|
| G-Rh1    | 15.44       | 637.4316 | 1.48E+06 | 1.53E+06 | 1.42E+06 | 1.49E+06 | 1.52E+06 | 1.50E+06 | 2.62    |
| CS-IVa   | 21.33       | 793.4374 | 1.85E+07 | 1.71E+07 | 1.79E+07 | 1.88E+07 | 1.78E+07 | 1.78E+07 | 3.33    |
| CS-IV    | 19.44       | 925.4797 | 1.48E+07 | 1.62E+07 | 1.49E+07 | 1.50E+07 | 1.60E+07 | 1.55E+07 | 3.87    |
| CS- V    | 17.14       | 955.4903 | 1.10E+07 | 1.13E+07 | 1.10E+07 | 1.10E+07 | 1.10E+07 | 1.10E+07 | 1.11    |
| G-Re     | 9.18        | 945.5423 | 1.76E+07 | 1.85E+07 | 1.79E+07 | 1.81E+07 | 1.87E+07 | 1.86E+07 | 2.39    |

**Table S6.** Information of the 612 saponins reported from the *Panax* genus as of 2023;

| No. | Saponins                                                                                           | Formula                                         | Exact Mass | Subtype       |
|-----|----------------------------------------------------------------------------------------------------|-------------------------------------------------|------------|---------------|
| 1   | 12 $\beta$ -acetoxy-3 $\beta$ ,6 $\alpha$ ,25-trihydroxy-24,25-dihydro_x0002_dammar-(E)-20(22)-ene | C <sub>32</sub> H <sub>54</sub> O <sub>5</sub>  | 518.3971   | PPT           |
| 2   | peudoginsenoside Rh2                                                                               | C <sub>36</sub> H <sub>62</sub> O <sub>8</sub>  | 622.4445   | PPD           |
| 3   | notoginsenoside SFt2                                                                               | C <sub>36</sub> H <sub>64</sub> O <sub>10</sub> | 656.4499   | PPD           |
| 4   | notoginsenoside SFt3                                                                               | C <sub>47</sub> H <sub>78</sub> O <sub>16</sub> | 898.5290   | PPD           |
| 5   | notoginsenoside SFt4                                                                               | C <sub>47</sub> H <sub>78</sub> O <sub>16</sub> | 898.5290   | PPD           |
| 6   | ginsenoside Ra <sub>1a</sub>                                                                       | C <sub>52</sub> H <sub>78</sub> O <sub>21</sub> | 1038.5036  | PPD           |
| 7   | hexanordammaran                                                                                    | C <sub>24</sub> H <sub>40</sub> O <sub>4</sub>  | 392.2927   | Others        |
| 8   | 27-demethyl-(E, E)-20(22),23-dien-3 $\beta$ ,6 $\alpha$ ,12 $\beta$ -trihydr-oxydammar-25-one      | C <sub>29</sub> H <sub>46</sub> O <sub>4</sub>  | 458.3396   | PPT           |
| 9   | oleanolic acid*                                                                                    | C <sub>30</sub> H <sub>48</sub> O <sub>3</sub>  | 456.3603   | OA            |
| 10  | panaxadione                                                                                        | C <sub>30</sub> H <sub>48</sub> O <sub>5</sub>  | 488.3502   | Miscellaneous |
| 11  | 3-keto-20(S)-protopanaxtriol                                                                       | C <sub>30</sub> H <sub>50</sub> O <sub>4</sub>  | 474.3709   | PPT           |
| 12  | 3 $\beta$ ,6 $\alpha$ ,12 $\beta$ -trihydroxy-20S,24R-epoxydammar-25-ene                           | C <sub>30</sub> H <sub>50</sub> O <sub>4</sub>  | 474.3709   | PPT           |
| 13  | 3 $\beta$ ,6 $\alpha$ ,12 $\beta$ -trihydroxy-20S,24S-epoxydammar-25-ene                           | C <sub>30</sub> H <sub>50</sub> O <sub>4</sub>  | 474.3709   | PPT           |
| 14  | dammara-(20E)22,25-diene-3 $\beta$ ,6 $\alpha$ ,12 $\beta$ ,24S-tetrol                             | C <sub>30</sub> H <sub>50</sub> O <sub>4</sub>  | 474.3709   | PPT           |
| 15  | 12 $\beta$ ,23(R)-epoxydammara-24-ene-3 $\beta$ ,6 $\alpha$ ,20(S)-triol                           | C <sub>30</sub> H <sub>50</sub> O <sub>4</sub>  | 474.3709   | PPT           |
| 16  | 20(S)-dammar-3-oxo-23-ene-25-hydroperoxyl-12 $\beta$ ,20-diol                                      | C <sub>30</sub> H <sub>50</sub> O <sub>5</sub>  | 490.3658   | PPT           |
| 17  | pseudoginsenoside R1                                                                               | C <sub>30</sub> H <sub>50</sub> O <sub>5</sub>  | 490.3658   | Others        |
| 18  | 20(S)-dammar-12-oxo-23-ene-25-hydroperoxyl-3 $\beta$ ,6 $\alpha$ ,20-triol                         | C <sub>30</sub> H <sub>50</sub> O <sub>6</sub>  | 506.3607   | PPT           |
| 19  | 20(S)-dammar-3-oxo-23-ene-25-hydroperoxyl-6 $\alpha$ ,12 $\beta$ ,20-triol                         | C <sub>30</sub> H <sub>50</sub> O <sub>6</sub>  | 506.3607   | PPT           |
| 20  | notoginsenoside R10                                                                                | C <sub>30</sub> H <sub>50</sub> O <sub>9</sub>  | 554.3455   | PPT           |
| 21  | Protopanaxadiol*                                                                                   | C <sub>30</sub> H <sub>52</sub> O <sub>3</sub>  | 460.3916   | PPD           |
| 22  | (20S,22S)-dammar-22,25-epoxy-3 $\beta$ ,12 $\beta$ ,20-triol                                       | C <sub>30</sub> H <sub>52</sub> O <sub>4</sub>  | 476.3866   | PPD           |
| 23  | 24-hydroxy-panaxdiol                                                                               | C <sub>30</sub> H <sub>52</sub> O <sub>4</sub>  | 476.3866   | PPD           |
| 24  | dammar-20S,25S-epoxy-3 $\beta$ ,12 $\beta$ ,26-triol                                               | C <sub>30</sub> H <sub>52</sub> O <sub>4</sub>  | 476.3866   | PPD           |
| 25  | ginsengenin S <sub>1</sub>                                                                         | C <sub>30</sub> H <sub>52</sub> O <sub>4</sub>  | 476.3866   | PPT           |
| 26  | ginsengenin S <sub>2</sub>                                                                         | C <sub>30</sub> H <sub>52</sub> O <sub>4</sub>  | 476.3866   | PPT           |
| 27  | Protopanaxatriol*                                                                                  | C <sub>30</sub> H <sub>52</sub> O <sub>4</sub>  | 476.3866   | PPT           |
| 28  | 24,26-dihydroxy-panaxdiol                                                                          | C <sub>30</sub> H <sub>52</sub> O <sub>5</sub>  | 492.3815   | PPD           |
| 29  | 26-hydroxyl-24(E)-20(S)-protopanaxtriol                                                            | C <sub>30</sub> H <sub>52</sub> O <sub>5</sub>  | 492.3815   | PPT           |
| 30  | ginsenotransmetin C                                                                                | C <sub>30</sub> H <sub>52</sub> O <sub>5</sub>  | 492.3815   | PPT           |
| 31  | 20(S)-dammar-25-ene-24(S)-hydroperoxyl-3 $\beta$ ,6 $\alpha$ ,12 $\beta$ ,20-tetrol                | C <sub>30</sub> H <sub>52</sub> O <sub>6</sub>  | 508.3764   | PPT           |
| 32  | 25-OH-protopanaxadiol                                                                              | C <sub>30</sub> H <sub>54</sub> O <sub>4</sub>  | 478.4022   | PPD           |
| 33  | 25-OH-protopanaxtriol                                                                              | C <sub>30</sub> H <sub>54</sub> O <sub>5</sub>  | 494.3971   | PPT           |
| 34  | 20(R)-20-methoxyl-dammarane-3 $\beta$ ,12 $\beta$ ,25-triol                                        | C <sub>31</sub> H <sub>56</sub> O <sub>4</sub>  | 492.4179   | PPD           |
| 35  | 20(R)-25-methoxyl-dammarane-3 $\beta$ ,12 $\beta$ ,20-triol                                        | C <sub>31</sub> H <sub>56</sub> O <sub>4</sub>  | 492.4179   | PPD           |
| 36  | 12 $\beta$ -acetoxy-3 $\beta$ ,6 $\alpha$ ,25-trihydroxy-24,25-dihydro-dammar-(E)-20(22)-ene       | C <sub>32</sub> H <sub>54</sub> O <sub>5</sub>  | 518.3971   | PPT           |
| 37  | notoginsenoside ST8                                                                                | C <sub>32</sub> H <sub>52</sub> O <sub>9</sub>  | 580.3611   | PPT           |
| 38  | notoginsenoside ST9                                                                                | C <sub>32</sub> H <sub>52</sub> O <sub>9</sub>  | 580.3611   | PPT           |
| 39  | 3 $\beta$ -acetoxy-6 $\alpha$ ,12 $\beta$ ,25-trihydroxy-24,25-dihydrodammar-(E)-20(22)-ene        | C <sub>32</sub> H <sub>54</sub> O <sub>5</sub>  | 518.3971   | PPT           |
| 40  | 6 $\alpha$ -acetoxy-3 $\beta$ ,12 $\beta$ ,20R-trihydroxydammar-24-ene                             | C <sub>32</sub> H <sub>54</sub> O <sub>5</sub>  | 518.3971   | PPT           |

|    |                                                                                                       |                                                 |          |                       |
|----|-------------------------------------------------------------------------------------------------------|-------------------------------------------------|----------|-----------------------|
| 41 | 6 $\alpha$ -acetoxy-3 $\beta$ ,12 $\beta$ ,20R-trihydroxydammar-25-ene                                | C <sub>32</sub> H <sub>54</sub> O <sub>5</sub>  | 518.3971 | PPT                   |
| 42 | pn-1                                                                                                  | C <sub>32</sub> H <sub>54</sub> O <sub>8</sub>  | 566.3819 | PPD                   |
| 43 | ginsenotransmetin B                                                                                   | C <sub>32</sub> H <sub>56</sub> O <sub>4</sub>  | 504.4179 | PPT                   |
| 44 | notoginsenoside ST6                                                                                   | C <sub>35</sub> H <sub>56</sub> O <sub>9</sub>  | 620.3924 | PPT                   |
| 45 | notoginsenoside ST7                                                                                   | C <sub>35</sub> H <sub>56</sub> O <sub>9</sub>  | 620.3924 | PPT                   |
| 46 | saringosteryl glucoside                                                                               | C <sub>35</sub> H <sub>58</sub> O <sub>7</sub>  | 590.4183 | Miscellaneous         |
| 47 | floralginsenoside Tb                                                                                  | C <sub>35</sub> H <sub>62</sub> O <sub>11</sub> | 658.4292 | PPT                   |
| 48 | 24(R) pseudoginsenoside Rt4                                                                           | C <sub>36</sub> H <sub>62</sub> O <sub>10</sub> | 654.4343 | OT                    |
| 49 | 24(S) pseudoginsenoside Rt4*                                                                          | C <sub>36</sub> H <sub>62</sub> O <sub>10</sub> | 654.4343 | OT                    |
| 50 | yesanchinoside R1*                                                                                    | C <sub>36</sub> H <sub>62</sub> O <sub>10</sub> | 654.4343 | PPT                   |
| 51 | 28-desglucosylchikusetsusaponin IV a*                                                                 | C <sub>36</sub> H <sub>56</sub> O <sub>9</sub>  | 632.3924 | OA                    |
| 52 | notoginsenoside SP18                                                                                  | C <sub>36</sub> H <sub>58</sub> O <sub>10</sub> | 650.4030 | PPT                   |
| 53 | oleanolic acid 28-O- $\beta$ -D-glucopyranose*                                                        | C <sub>36</sub> H <sub>58</sub> O <sub>8</sub>  | 618.4132 | OA                    |
| 54 | prosaikogenin H*                                                                                      | C <sub>36</sub> H <sub>58</sub> O <sub>8</sub>  | 618.4132 | Others                |
| 55 | maslinic acid 28-O- $\beta$ -d-glucopyranoside*                                                       | C <sub>36</sub> H <sub>58</sub> O <sub>9</sub>  | 634.4081 | OA                    |
| 56 | floralginsenoside Ta                                                                                  | C <sub>36</sub> H <sub>60</sub> O <sub>10</sub> | 652.4186 | PPT                   |
| 57 | ginsenoside Rh <sub>11</sub>                                                                          | C <sub>36</sub> H <sub>60</sub> O <sub>10</sub> | 652.4186 | C17 side-chain varied |
| 58 | ginsenoside ST1                                                                                       | C <sub>36</sub> H <sub>60</sub> O <sub>10</sub> | 652.4186 | PPT                   |
| 59 | notoginsenoside Ab2                                                                                   | C <sub>36</sub> H <sub>60</sub> O <sub>10</sub> | 652.4186 | C17 side-chain varied |
| 60 | notoginsenoside SP12                                                                                  | C <sub>36</sub> H <sub>60</sub> O <sub>10</sub> | 652.4186 | PPT                   |
| 61 | notoginsenoside SP13                                                                                  | C <sub>36</sub> H <sub>60</sub> O <sub>10</sub> | 652.4186 | PPT                   |
| 62 | notoginsenoside SP15                                                                                  | C <sub>36</sub> H <sub>60</sub> O <sub>10</sub> | 652.4186 | PPT                   |
| 63 | notoginsenoside T1                                                                                    | C <sub>36</sub> H <sub>60</sub> O <sub>10</sub> | 652.4186 | PPT                   |
| 64 | pseudoginsenoside RT6                                                                                 | C <sub>36</sub> H <sub>60</sub> O <sub>10</sub> | 652.4186 | Others                |
| 65 | ginsenoside Rh <sub>3</sub>                                                                           | C <sub>36</sub> H <sub>60</sub> O <sub>7</sub>  | 604.4339 | PPD                   |
| 66 | ginsenoside Rk <sub>2</sub> *                                                                         | C <sub>36</sub> H <sub>60</sub> O <sub>7</sub>  | 604.4339 | C17 side-chain varied |
| 67 | ginsenoside Rh <sub>16</sub>                                                                          | C <sub>36</sub> H <sub>60</sub> O <sub>8</sub>  | 620.4288 | PPT                   |
| 68 | ginsenoside Rh <sub>4</sub> *                                                                         | C <sub>36</sub> H <sub>60</sub> O <sub>8</sub>  | 620.4288 | PPT                   |
| 69 | ginsenoside Rk <sub>3</sub> *                                                                         | C <sub>36</sub> H <sub>60</sub> O <sub>8</sub>  | 620.4288 | C17 side-chain varied |
| 70 | ginsenoslaloside I                                                                                    | C <sub>36</sub> H <sub>60</sub> O <sub>8</sub>  | 620.4288 | C17 side-chain varied |
| 71 | notoginsenoside SFt6                                                                                  | C <sub>36</sub> H <sub>60</sub> O <sub>8</sub>  | 620.4288 | C17 side-chain varied |
| 72 | notoginsenoside SFt8                                                                                  | C <sub>36</sub> H <sub>60</sub> O <sub>8</sub>  | 620.4288 | C17 side-chain varied |
| 73 | 3 $\beta$ ,20(S)-dihydroxydammar-24-en-12 $\beta$ ,23 $\beta$ -epoxy-20-O- $\beta$ -D-glucopyranoside | C <sub>36</sub> H <sub>60</sub> O <sub>8</sub>  | 620.4288 | PPD                   |
| 74 | 20(S) sanchirrhinoside A8                                                                             | C <sub>36</sub> H <sub>60</sub> O <sub>9</sub>  | 636.4237 | PPT                   |
| 75 | 3-oxo-20(R)-ginsenoside Rh1                                                                           | C <sub>36</sub> H <sub>60</sub> O <sub>9</sub>  | 636.4237 | PPT                   |
| 76 | ginsenoside LS <sub>1</sub>                                                                           | C <sub>36</sub> H <sub>60</sub> O <sub>9</sub>  | 636.4237 | PPT                   |
| 77 | ginsenoside Rh <sub>22</sub>                                                                          | C <sub>36</sub> H <sub>60</sub> O <sub>9</sub>  | 636.4237 | Others                |
| 78 | ginsenoside Rh <sub>5</sub>                                                                           | C <sub>36</sub> H <sub>60</sub> O <sub>9</sub>  | 636.4237 | PPT                   |
| 79 | ginsenoside Rh <sub>7</sub>                                                                           | C <sub>36</sub> H <sub>60</sub> O <sub>9</sub>  | 636.4237 | Miscellaneous         |
| 80 | ginsenoside Rh <sub>8</sub>                                                                           | C <sub>36</sub> H <sub>60</sub> O <sub>9</sub>  | 636.4237 | Miscellaneous         |
| 81 | ginsenoside Rh <sub>9</sub>                                                                           | C <sub>36</sub> H <sub>60</sub> O <sub>9</sub>  | 636.4237 | PPD                   |
| 82 | ginsenoside Rk <sub>6</sub>                                                                           | C <sub>36</sub> H <sub>60</sub> O <sub>9</sub>  | 636.4237 | C17 side-chain varied |
| 83 | notoginsenoside Ab1                                                                                   | C <sub>36</sub> H <sub>60</sub> O <sub>9</sub>  | 636.4237 | C17 side-chain varied |

|     |                                     |                                                 |          |                          |
|-----|-------------------------------------|-------------------------------------------------|----------|--------------------------|
| 84  | notoginsenoside Ab3                 | C <sub>36</sub> H <sub>60</sub> O <sub>9</sub>  | 636.4237 | C17 side-chain<br>varied |
| 85  | notoginsenoside ST14                | C <sub>36</sub> H <sub>60</sub> O <sub>9</sub>  | 636.4237 | PPT                      |
| 86  | chikusetsusaponin L <sub>9a</sub> * | C <sub>36</sub> H <sub>62</sub> O <sub>10</sub> | 654.4343 | PPT                      |
| 87  | ginsenoside Ki                      | C <sub>36</sub> H <sub>62</sub> O <sub>10</sub> | 654.4343 | PPT                      |
| 88  | ginsenoside Km                      | C <sub>36</sub> H <sub>62</sub> O <sub>10</sub> | 654.4343 | PPT                      |
| 89  | ginsenoside M7cd                    | C <sub>36</sub> H <sub>62</sub> O <sub>10</sub> | 654.4343 | PPT                      |
| 90  | ginsenoside SG <sub>1</sub>         | C <sub>36</sub> H <sub>62</sub> O <sub>10</sub> | 654.4343 | Others                   |
| 91  | ginsenoside ST <sub>2</sub>         | C <sub>36</sub> H <sub>62</sub> O <sub>10</sub> | 654.4343 | PPT                      |
| 92  | notoginsenoside R8                  | C <sub>36</sub> H <sub>62</sub> O <sub>10</sub> | 654.4343 | PPT                      |
| 93  | notoginsenoside R9                  | C <sub>36</sub> H <sub>62</sub> O <sub>10</sub> | 654.4343 | PPT                      |
| 94  | notoginsenoside SP14                | C <sub>36</sub> H <sub>62</sub> O <sub>10</sub> | 654.4343 | PPT                      |
| 95  | notoginsenoside SP21                | C <sub>36</sub> H <sub>62</sub> O <sub>10</sub> | 654.4343 | PPT                      |
| 96  | notoginsenoside ST1                 | C <sub>36</sub> H <sub>62</sub> O <sub>10</sub> | 654.4343 | PPT                      |
| 97  | notoginsenoside ST6                 | C <sub>36</sub> H <sub>62</sub> O <sub>10</sub> | 654.4343 | PPT                      |
| 98  | notoginsenoside ST7                 | C <sub>36</sub> H <sub>62</sub> O <sub>10</sub> | 654.4343 | PPT                      |
| 99  | notopanaxoside A                    | C <sub>36</sub> H <sub>62</sub> O <sub>10</sub> | 654.4343 | PPT                      |
| 100 | pseudoginsenoside RT4*              | C <sub>36</sub> H <sub>62</sub> O <sub>10</sub> | 654.4343 | OT                       |
| 101 | pseudoginsenoside RT5               | C <sub>36</sub> H <sub>62</sub> O <sub>10</sub> | 654.4343 | OT                       |
| 102 | vinaginsenoside R10                 | C <sub>36</sub> H <sub>62</sub> O <sub>10</sub> | 654.4343 | PPT                      |
| 103 | yesanchinoside R3*                  | C <sub>36</sub> H <sub>62</sub> O <sub>10</sub> | 654.4343 | PPT                      |
| 104 | 20(R) ginsenoside ST2               | C <sub>36</sub> H <sub>62</sub> O <sub>10</sub> | 654.4343 | PPT                      |
| 105 | 20(R) ginsenoside-SF                | C <sub>36</sub> H <sub>62</sub> O <sub>10</sub> | 654.4343 | PPT                      |
| 106 | floralginsenoside Ka                | C <sub>36</sub> H <sub>62</sub> O <sub>11</sub> | 670.4292 | PPT                      |
| 107 | floralquinquenoside A               | C <sub>36</sub> H <sub>62</sub> O <sub>11</sub> | 670.4292 | PPT                      |
| 108 | ginsenoside Rh <sub>6</sub>         | C <sub>36</sub> H <sub>62</sub> O <sub>11</sub> | 670.4292 | PPD                      |
| 109 | ginsenoside SF                      | C <sub>36</sub> H <sub>62</sub> O <sub>11</sub> | 670.4292 | PPT                      |
| 110 | ginsenoside SG <sub>2</sub>         | C <sub>36</sub> H <sub>62</sub> O <sub>11</sub> | 670.4292 | Others                   |
| 111 | ginsenoside SL <sub>1</sub>         | C <sub>36</sub> H <sub>62</sub> O <sub>11</sub> | 670.4292 | PPT                      |
| 112 | notoginsenoside SP4                 | C <sub>36</sub> H <sub>62</sub> O <sub>11</sub> | 670.4292 | PPT                      |
| 113 | notoginsenoside SP5                 | C <sub>36</sub> H <sub>62</sub> O <sub>11</sub> | 670.4292 | PPT                      |
| 114 | notoginsenoside SP6                 | C <sub>36</sub> H <sub>62</sub> O <sub>11</sub> | 670.4292 | PPT                      |
| 115 | notoginsenoside SP7                 | C <sub>36</sub> H <sub>62</sub> O <sub>11</sub> | 670.4292 | PPT                      |
| 116 | notoginsenoside SP8                 | C <sub>36</sub> H <sub>62</sub> O <sub>11</sub> | 670.4292 | PPT                      |
| 117 | notoginsenoside T4                  | C <sub>36</sub> H <sub>62</sub> O <sub>11</sub> | 670.4292 | PPT                      |
| 118 | 20(S) ginsenoside SG2               | C <sub>36</sub> H <sub>62</sub> O <sub>11</sub> | 670.4292 | others                   |
| 119 | compound K                          | C <sub>36</sub> H <sub>62</sub> O <sub>8</sub>  | 622.4445 | PPD                      |
| 120 | ginsenoside Rh <sub>2</sub> *       | C <sub>36</sub> H <sub>62</sub> O <sub>8</sub>  | 622.4445 | PPD                      |
| 121 | ginsenosides Rh <sub>10</sub>       | C <sub>36</sub> H <sub>62</sub> O <sub>8</sub>  | 622.4445 | PPD                      |
| 122 | notoginsenoside R7                  | C <sub>36</sub> H <sub>62</sub> O <sub>8</sub>  | 622.4445 | PPD                      |
| 123 | notoginsenoside SFt7                | C <sub>36</sub> H <sub>62</sub> O <sub>8</sub>  | 622.4445 | C17 side-chain<br>varied |
| 124 | ginsenoside M <sub>1</sub>          | C <sub>36</sub> H <sub>62</sub> O <sub>8</sub>  | 622.4445 | PPD                      |
| 125 | 20(R) ginsenoside Rh1*              | C <sub>36</sub> H <sub>62</sub> O <sub>9</sub>  | 638.4394 | PPT                      |
| 126 | chikusetsusaponin L <sub>10</sub> * | C <sub>36</sub> H <sub>62</sub> O <sub>9</sub>  | 638.4394 | PPT                      |
| 127 | ginsenoside F <sub>1</sub> *        | C <sub>36</sub> H <sub>62</sub> O <sub>9</sub>  | 638.4394 | PPT                      |
| 128 | ginsenoside Rh <sub>13</sub>        | C <sub>36</sub> H <sub>62</sub> O <sub>9</sub>  | 638.4394 | PPD                      |
| 129 | ginsenoside Rh <sub>19</sub>        | C <sub>36</sub> H <sub>62</sub> O <sub>9</sub>  | 638.4394 | PPT                      |
| 130 | notoginsenoside SFt1                | C <sub>36</sub> H <sub>62</sub> O <sub>9</sub>  | 638.4394 | PPD                      |
| 131 | notoginsenoside SFt5                | C <sub>36</sub> H <sub>62</sub> O <sub>9</sub>  | 638.4394 | C17 side-chain<br>varied |
| 132 | notoginsenoside ST13                | C <sub>36</sub> H <sub>62</sub> O <sub>9</sub>  | 638.4394 | PPT                      |
| 133 | sanchinoside B1                     | C <sub>36</sub> H <sub>62</sub> O <sub>9</sub>  | 638.4394 | PPT                      |
| 134 | 20(R) ginsenoside Rh19              | C <sub>36</sub> H <sub>62</sub> O <sub>9</sub>  | 638.4394 | PPT                      |



|     |                                                                                      |                                                 |          |                          |
|-----|--------------------------------------------------------------------------------------|-------------------------------------------------|----------|--------------------------|
| 135 | 20(S) ginsenoside Rh1*                                                               | C <sub>36</sub> H <sub>62</sub> O <sub>9</sub>  | 638.4394 | PPT                      |
| 136 | 20(S) ginsenoside Rh19                                                               | C <sub>36</sub> H <sub>62</sub> O <sub>9</sub>  | 638.4394 | PPT                      |
| 137 | 25-hydroxyginsenoside Rk3                                                            | C <sub>36</sub> H <sub>62</sub> O <sub>9</sub>  | 638.4394 | C17 side-chain<br>varied |
| 138 | 3-O-β-D-glucopyranosyl-20(S)-protopanaxtriol                                         | C <sub>36</sub> H <sub>62</sub> O <sub>9</sub>  | 638.4394 | PPT                      |
| 139 | ginsenoside Rh <sub>12</sub>                                                         | C <sub>36</sub> H <sub>64</sub> O <sub>10</sub> | 656.4499 | PPD                      |
| 140 | 20(R)-25-hydroxyginsenoside Rh1                                                      | C <sub>36</sub> H <sub>64</sub> O <sub>10</sub> | 656.4499 | PPT                      |
| 141 | vinaginsenoside R12                                                                  | C <sub>36</sub> H <sub>64</sub> O <sub>11</sub> | 672.4449 | PPT                      |
| 142 | 28-desglucosylchikusetsusaponin IVa methyl<br>ester*bai                              | C <sub>37</sub> H <sub>58</sub> O <sub>9</sub>  | 646.4081 | OA                       |
| 143 | 3-formyloxy-20-O-β-D-glucopyranosyl-20(S)-<br>protopanaxtriol                        | C <sub>37</sub> H <sub>62</sub> O <sub>10</sub> | 666.4343 | PPT                      |
| 144 | ginsenoside Rh <sub>23</sub>                                                         | C <sub>37</sub> H <sub>64</sub> O <sub>10</sub> | 666.4343 | PPT                      |
| 145 | notoginsenoside SP10                                                                 | C <sub>37</sub> H <sub>64</sub> O <sub>11</sub> | 682.4292 | PPT                      |
| 146 | notoginsenoside SP20                                                                 | C <sub>37</sub> H <sub>64</sub> O <sub>11</sub> | 682.4292 | PPT                      |
| 147 | notoginsenoside SP9                                                                  | C <sub>37</sub> H <sub>64</sub> O <sub>11</sub> | 682.4292 | PPT                      |
| 148 | ginsenoside Rs <sub>6</sub>                                                          | C <sub>38</sub> H <sub>60</sub> O <sub>8</sub>  | 644.4288 | C17 side-chain<br>varied |
| 149 | 28-desglucosylchikusetsusaponin IVa ethyl ester                                      | C <sub>38</sub> H <sub>60</sub> O <sub>9</sub>  | 660.4237 | OA                       |
| 150 | notoginsenoside ST10                                                                 | C <sub>38</sub> H <sub>62</sub> O <sub>13</sub> | 726.419  | PPD                      |
| 151 | ginsenoside Rs <sub>7</sub>                                                          | C <sub>38</sub> H <sub>62</sub> O <sub>9</sub>  | 662.4394 | PPT                      |
| 152 | 20(R) ginsenoside Rh1 6'-acetate*                                                    | C <sub>38</sub> H <sub>64</sub> O <sub>10</sub> | 680.4499 | PPT                      |
| 153 | 6'-acetyl ginsenoside-F1                                                             | C <sub>38</sub> H <sub>64</sub> O <sub>10</sub> | 680.4499 | PPT                      |
| 154 | 20(S) ginsenoside-Rh1-6'-acetate                                                     | C <sub>38</sub> H <sub>64</sub> O <sub>10</sub> | 680.4499 | PPT                      |
| 155 | 3β-acetoxyl ginsenoside F1*                                                          | C <sub>38</sub> H <sub>64</sub> O <sub>10</sub> | 680.4499 | PPT                      |
| 156 | notoginsenoside T3                                                                   | C <sub>38</sub> H <sub>66</sub> O <sub>9</sub>  | 666.4707 | PPT                      |
| 157 | malonylginsenoside Rk2                                                               | C <sub>39</sub> H <sub>62</sub> O <sub>10</sub> | 678.4343 | C17 side-chain<br>varied |
| 158 | malonylginsenoside Rk3                                                               | C <sub>39</sub> H <sub>62</sub> O <sub>11</sub> | 694.4292 | C17 side-chain<br>varied |
| 159 | 28-desglucosylchikusetsusaponin IVa butyl<br>ester*                                  | C <sub>40</sub> H <sub>64</sub> O <sub>9</sub>  | 688.4550 | OA                       |
| 160 | 20(S) sanchirrhinoside A9                                                            | C <sub>40</sub> H <sub>66</sub> O <sub>10</sub> | 706.4656 | PPT                      |
| 161 | 20(S) sanchirrhinoside A1                                                            | C <sub>40</sub> H <sub>66</sub> O <sub>10</sub> | 706.4656 | PPT                      |
| 162 | dammar-12,24-dien-3α,6β,15α-triol-3α-D-<br>arabinopyra-nosyl-6β-L-arabinopyranoside  | C <sub>40</sub> H <sub>66</sub> O <sub>11</sub> | 722.4605 | Miscellaneous            |
| 163 | 6'-malonyl methyl ester ginsenoside F1                                               | C <sub>40</sub> H <sub>66</sub> O <sub>12</sub> | 738.4554 | PPT                      |
| 164 | dammar-24-en-3α,6β,16α,20β-tetraol-3α-D-<br>arabinopy-ranosyl-6β-D-arabinopyranoside | C <sub>40</sub> H <sub>66</sub> O <sub>12</sub> | 738.4554 | Miscellaneous            |
| 165 | 20(R) protopanaxadiol                                                                | C <sub>40</sub> H <sub>70</sub> O <sub>12</sub> | 742.4867 | PPD                      |
| 166 | chikusetsusaponin Ia*                                                                | C <sub>41</sub> H <sub>70</sub> O <sub>12</sub> | 754.4867 | PPD                      |
| 167 | 24(S) majoroside R2*                                                                 | C <sub>41</sub> H <sub>70</sub> O <sub>14</sub> | 786.4766 | OT                       |
| 168 | yesanchinoside R2*                                                                   | C <sub>41</sub> H <sub>70</sub> O <sub>14</sub> | 786.4766 | PPT                      |
| 169 | 28-desglucosylchikusetsusaponin IV*                                                  | C <sub>41</sub> H <sub>64</sub> O <sub>13</sub> | 764.4347 | OA                       |
| 170 | pseudoginsenoside Rp1*                                                               | C <sub>41</sub> H <sub>64</sub> O <sub>13</sub> | 764.4347 | OA                       |
| 171 | pjs-4*                                                                               | C <sub>41</sub> H <sub>66</sub> O <sub>12</sub> | 750.4554 | OA                       |
| 172 | notoginsenoside ST11                                                                 | C <sub>41</sub> H <sub>68</sub> O <sub>11</sub> | 736.4762 | PPD                      |
| 173 | notoginsenoside ST12                                                                 | C <sub>41</sub> H <sub>68</sub> O <sub>11</sub> | 736.4762 | PPD                      |
| 174 | notoginsenoside-LY                                                                   | C <sub>41</sub> H <sub>68</sub> O <sub>12</sub> | 752.4711 | PPD                      |
| 175 | notoginsenoside T5*                                                                  | C <sub>41</sub> H <sub>68</sub> O <sub>12</sub> | 752.4711 | PPT                      |
| 176 | chikusetsusaponin FH <sub>1</sub> *                                                  | C <sub>41</sub> H <sub>68</sub> O <sub>13</sub> | 768.4660 | Others                   |
| 177 | chikusetsusaponin FT <sub>1</sub> *                                                  | C <sub>41</sub> H <sub>68</sub> O <sub>13</sub> | 768.4660 | Others                   |
| 178 | notoginsenoside SY3                                                                  | C <sub>41</sub> H <sub>68</sub> O <sub>14</sub> | 784.4609 | PPD                      |
| 179 | notoginsenoside SY1                                                                  | C <sub>41</sub> H <sub>68</sub> O <sub>17</sub> | 832.4457 | PPD                      |

|     |                                                                                          |                                                 |          |                       |
|-----|------------------------------------------------------------------------------------------|-------------------------------------------------|----------|-----------------------|
| 180 | ginsenoside Mc                                                                           | C <sub>41</sub> H <sub>70</sub> O <sub>12</sub> | 754.4867 | PPD                   |
| 181 | 20(R) notoginsenoside R2                                                                 | C <sub>41</sub> H <sub>70</sub> O <sub>13</sub> | 770.4816 | PPT                   |
| 182 | 20(R) sanchirrhinoside A3*                                                               | C <sub>41</sub> H <sub>70</sub> O <sub>13</sub> | 770.4816 | PPT                   |
| 183 | 20(R) sanchirrhinoside A4*                                                               | C <sub>41</sub> H <sub>70</sub> O <sub>13</sub> | 770.4816 | PPT                   |
| 184 | 20(S) notoginsenoside R2                                                                 | C <sub>41</sub> H <sub>70</sub> O <sub>13</sub> | 770.4816 | PPT                   |
| 185 | 20(S) sanchirrhinoside A3                                                                | C <sub>41</sub> H <sub>70</sub> O <sub>13</sub> | 770.4816 | PPT                   |
| 186 | 6-O-(β-D-glucopyranosyl)-20-O-(β-D-xylopyranosyl)-3β,6α,12β,20(S)-tetrahydroxydammar-ene | C <sub>41</sub> H <sub>70</sub> O <sub>13</sub> | 770.4816 | PPT                   |
| 187 | chikusetsusaponin L <sub>8</sub>                                                         | C <sub>41</sub> H <sub>70</sub> O <sub>13</sub> | 770.4816 | PPT                   |
| 188 | chikusetsusaponin LM <sub>1</sub> *                                                      | C <sub>41</sub> H <sub>70</sub> O <sub>13</sub> | 770.4816 | PPT                   |
| 189 | ginsenoside F <sub>3</sub> *                                                             | C <sub>41</sub> H <sub>70</sub> O <sub>13</sub> | 770.4816 | PPT                   |
| 190 | ginsenoside F <sub>5</sub> *                                                             | C <sub>41</sub> H <sub>70</sub> O <sub>13</sub> | 770.4816 | PPT                   |
| 191 | notoginsenoside R2*                                                                      | C <sub>41</sub> H <sub>70</sub> O <sub>13</sub> | 770.4816 | PPT                   |
| 192 | pseudoginsenoside RT <sub>3</sub> *                                                      | C <sub>41</sub> H <sub>70</sub> O <sub>13</sub> | 770.4816 | PPT                   |
| 193 | pseudoginsenoside RT <sub>2</sub> *                                                      | C <sub>41</sub> H <sub>70</sub> O <sub>13</sub> | 770.4816 | OT                    |
| 194 | 24(R) majoroside R2*                                                                     | C <sub>41</sub> H <sub>70</sub> O <sub>14</sub> | 786.4766 | OT                    |
| 195 | majonoside R2*                                                                           | C <sub>41</sub> H <sub>70</sub> O <sub>14</sub> | 786.4766 | OT                    |
| 196 | notoginsenoside Rw <sub>2</sub>                                                          | C <sub>41</sub> H <sub>70</sub> O <sub>14</sub> | 786.4766 | PPT                   |
| 197 | vinaginsenoside R11                                                                      | C <sub>41</sub> H <sub>70</sub> O <sub>14</sub> | 786.4766 | PPT                   |
| 198 | floralginsenoside C                                                                      | C <sub>41</sub> H <sub>70</sub> O <sub>15</sub> | 802.4715 | PPT                   |
| 199 | floralginsenoside D                                                                      | C <sub>41</sub> H <sub>70</sub> O <sub>15</sub> | 802.4715 | PPT                   |
| 200 | vinaginsenoside R14                                                                      | C <sub>41</sub> H <sub>70</sub> O <sub>15</sub> | 802.4715 | PPT                   |
| 201 | chikusetsusaponin II*                                                                    | C <sub>42</sub> H <sub>66</sub> O <sub>14</sub> | 794.4453 | OA                    |
| 202 | 24(S) Pseudoginsenoside F11*                                                             | C <sub>42</sub> H <sub>72</sub> O <sub>14</sub> | 800.4922 | OT                    |
| 203 | vinaginsenoside R15*                                                                     | C <sub>42</sub> H <sub>72</sub> O <sub>15</sub> | 816.4871 | C17 side-chain varied |
| 204 | notoginsenoside J*                                                                       | C <sub>42</sub> H <sub>74</sub> O <sub>16</sub> | 834.4977 | PPT                   |
| 205 | 28-desglucosylchikusetsusaponin IV methyl ester                                          | C <sub>42</sub> H <sub>66</sub> O <sub>13</sub> | 778.4503 | OA                    |
| 206 | bipinoside A*                                                                            | C <sub>42</sub> H <sub>66</sub> O <sub>13</sub> | 778.4503 | OA                    |
| 207 | chikusetsusaponin IVa*                                                                   | C <sub>42</sub> H <sub>66</sub> O <sub>14</sub> | 794.4453 | OA                    |
| 208 | zingibroside R1*                                                                         | C <sub>42</sub> H <sub>66</sub> O <sub>14</sub> | 794.4453 | OA                    |
| 209 | cynarasaponin C*                                                                         | C <sub>42</sub> H <sub>66</sub> O <sub>15</sub> | 810.4402 | UA                    |
| 210 | ginsenoside F <sub>4</sub> *                                                             | C <sub>42</sub> H <sub>70</sub> O <sub>12</sub> | 766.4867 | PPT                   |
| 211 | ginsenoside Rg <sub>4</sub>                                                              | C <sub>42</sub> H <sub>70</sub> O <sub>12</sub> | 766.4867 | PPT                   |
| 212 | ginsenoside Rg <sub>5</sub> *                                                            | C <sub>42</sub> H <sub>70</sub> O <sub>12</sub> | 766.4867 | PPD                   |
| 213 | ginsenoside Rg <sub>6</sub> *                                                            | C <sub>42</sub> H <sub>70</sub> O <sub>12</sub> | 766.4867 | PPD                   |
| 214 | ginsenoside Rk <sub>1</sub> *                                                            | C <sub>42</sub> H <sub>70</sub> O <sub>12</sub> | 766.4867 | C17 side-chain varied |
| 215 | ginsenoside Rz <sub>1</sub>                                                              | C <sub>42</sub> H <sub>70</sub> O <sub>12</sub> | 766.4867 | PPD                   |
| 216 | sanchirrhinoside D                                                                       | C <sub>42</sub> H <sub>70</sub> O <sub>12</sub> | 766.4867 | C17 side-chain varied |
| 217 | 20(E) ginsenoside Rg <sub>9</sub> *                                                      | C <sub>42</sub> H <sub>70</sub> O <sub>13</sub> | 782.4816 | PPT                   |
| 218 | 12-O-glucoginsenoside Rh <sub>4</sub>                                                    | C <sub>42</sub> H <sub>70</sub> O <sub>13</sub> | 782.4816 | PPT                   |
| 219 | 20(Z) ginsenoside Rg <sub>9</sub>                                                        | C <sub>42</sub> H <sub>70</sub> O <sub>13</sub> | 782.4816 | PPT                   |
| 220 | ginsenoside La                                                                           | C <sub>42</sub> H <sub>70</sub> O <sub>13</sub> | 782.4816 | PPT                   |
| 221 | ginsenoside Rh <sub>14</sub>                                                             | C <sub>42</sub> H <sub>70</sub> O <sub>13</sub> | 782.4816 | PPT                   |
| 222 | ginsenoside Rh <sub>15</sub>                                                             | C <sub>42</sub> H <sub>70</sub> O <sub>13</sub> | 782.4816 | PPT                   |
| 223 | ginsenoside Rh <sub>17</sub>                                                             | C <sub>42</sub> H <sub>70</sub> O <sub>13</sub> | 782.4816 | Miscellaneous         |
| 224 | sanchirrhinoside B                                                                       | C <sub>42</sub> H <sub>70</sub> O <sub>13</sub> | 782.4816 | PPT                   |
| 225 | 12,23-epoxyginsenoside-Rg1                                                               | C <sub>42</sub> H <sub>70</sub> O <sub>14</sub> | 798.4766 | PPT                   |
| 226 | 12-one-pseudoginsenoside F11                                                             | C <sub>42</sub> H <sub>70</sub> O <sub>14</sub> | 798.4766 | Miscellaneous         |
| 227 | ginsenoside Rg <sub>10</sub>                                                             | C <sub>42</sub> H <sub>70</sub> O <sub>14</sub> | 798.4766 | PPT                   |

|     |                                                                                                  |                                                 |          |                          |
|-----|--------------------------------------------------------------------------------------------------|-------------------------------------------------|----------|--------------------------|
| 228 | ginsenoside Rg <sub>8</sub>                                                                      | C <sub>42</sub> H <sub>70</sub> O <sub>14</sub> | 798.4766 | PPT                      |
| 229 | ginsenoside SL <sub>2</sub>                                                                      | C <sub>42</sub> H <sub>70</sub> O <sub>14</sub> | 798.4766 | PPT                      |
| 230 | ginsenoside SL <sub>3</sub>                                                                      | C <sub>42</sub> H <sub>70</sub> O <sub>14</sub> | 798.4766 | PPT                      |
| 231 | pseudoginsenoside G1                                                                             | C <sub>42</sub> H <sub>70</sub> O <sub>14</sub> | 798.4766 | Others                   |
| 232 | pseudoginsenoside G2                                                                             | C <sub>42</sub> H <sub>70</sub> O <sub>14</sub> | 798.4766 | Others                   |
| 233 | ginsenoside Rg <sub>11</sub>                                                                     | C <sub>42</sub> H <sub>70</sub> O <sub>14</sub> | 798.4766 | PPD                      |
| 234 | pseudoginsenoside RT8                                                                            | C <sub>42</sub> H <sub>70</sub> O <sub>15</sub> | 814.4715 | Others                   |
| 235 | vinaginsenoside R25                                                                              | C <sub>42</sub> H <sub>70</sub> O <sub>15</sub> | 814.4715 | PPT                      |
| 236 | 20(S) sanchirrhinoside A7                                                                        | C <sub>42</sub> H <sub>72</sub> O <sub>13</sub> | 784.4973 | PPT                      |
| 237 | 25-hydroxyl-(E)-20(22)-ene-ginsenoside Rg <sub>3</sub>                                           | C <sub>42</sub> H <sub>72</sub> O <sub>13</sub> | 784.4973 | PPD                      |
| 238 | ginsenoside F <sub>2</sub> <sup>*</sup>                                                          | C <sub>42</sub> H <sub>72</sub> O <sub>13</sub> | 784.4973 | PPD                      |
| 239 | ginsenoside Rg <sub>2</sub> <sup>*</sup>                                                         | C <sub>42</sub> H <sub>72</sub> O <sub>13</sub> | 784.4973 | PPT                      |
| 240 | 25-hydroxylginsenoside Rk1                                                                       | C <sub>42</sub> H <sub>72</sub> O <sub>13</sub> | 784.4973 | C17 side-chain<br>varied |
| 241 | ginsenoside Rg <sub>3</sub> <sup>*</sup>                                                         | C <sub>42</sub> H <sub>72</sub> O <sub>13</sub> | 784.4973 | PPD                      |
| 242 | 20(S) ginsenoside-Rf-1a                                                                          | C <sub>42</sub> H <sub>72</sub> O <sub>14</sub> | 800.4922 | PPT                      |
| 243 | 20(S) sanchirrhinoside A4                                                                        | C <sub>42</sub> H <sub>72</sub> O <sub>14</sub> | 800.4922 | PPT                      |
| 244 | 24(R) pseudoginsenoside F11 <sup>*</sup>                                                         | C <sub>42</sub> H <sub>72</sub> O <sub>14</sub> | 800.4922 | OT                       |
| 245 | ginsenoside Ia                                                                                   | C <sub>42</sub> H <sub>72</sub> O <sub>14</sub> | 800.4922 | PPT                      |
| 246 | ginsenoside Ib                                                                                   | C <sub>42</sub> H <sub>72</sub> O <sub>14</sub> | 800.4922 | Others                   |
| 247 | ginsenoside Rf <sup>*</sup>                                                                      | C <sub>42</sub> H <sub>72</sub> O <sub>14</sub> | 800.4922 | PPT                      |
| 248 | ginsenoside Rg <sub>1</sub> <sup>*</sup>                                                         | C <sub>42</sub> H <sub>72</sub> O <sub>14</sub> | 800.4922 | PPT                      |
| 249 | ginsenoside Rg <sub>7</sub>                                                                      | C <sub>42</sub> H <sub>72</sub> O <sub>14</sub> | 800.4922 | PPD                      |
| 250 | ginsenosides Rh <sub>20</sub>                                                                    | C <sub>42</sub> H <sub>72</sub> O <sub>14</sub> | 800.4922 | PPT                      |
| 251 | majoroside F2 <sup>*</sup>                                                                       | C <sub>42</sub> H <sub>72</sub> O <sub>14</sub> | 800.4922 | C17 side-chain<br>varied |
| 252 | majoroside F3 <sup>*</sup>                                                                       | C <sub>42</sub> H <sub>72</sub> O <sub>14</sub> | 800.4922 | C17 side-chain<br>varied |
| 253 | majoroside F4 <sup>*</sup>                                                                       | C <sub>42</sub> H <sub>72</sub> O <sub>14</sub> | 800.4922 | PPD                      |
| 254 | notoginsenoside ST-8                                                                             | C <sub>42</sub> H <sub>72</sub> O <sub>14</sub> | 800.4922 | PPT                      |
| 255 | notoginsenoside U                                                                                | C <sub>42</sub> H <sub>72</sub> O <sub>14</sub> | 800.4922 | PPT                      |
| 256 | 20(S)-6-O-[β-D-glucopyranosyl-(1→2)-β-D-glucopyranosyl]-dammar-20,25-epoxy-3β,6α,12β,24α-tetriol | C <sub>42</sub> H <sub>72</sub> O <sub>15</sub> | 816.4871 | PPT                      |
| 257 | 24(R) majoroside R1 <sup>*</sup>                                                                 | C <sub>42</sub> H <sub>72</sub> O <sub>15</sub> | 816.4871 | OT                       |
| 258 | 6-O-[β-D-glucopyranosyl-(1→2)-β-D-glucopyranosyl]-dammar-25(26)-ene-3β,6α,12β,20S,24R-pentaol    | C <sub>42</sub> H <sub>72</sub> O <sub>15</sub> | 816.4871 | PPT                      |
| 259 | floralginsenoside E <sup>*</sup>                                                                 | C <sub>42</sub> H <sub>72</sub> O <sub>15</sub> | 816.4871 | PPD                      |
| 260 | floralginsenoside F                                                                              | C <sub>42</sub> H <sub>72</sub> O <sub>15</sub> | 816.4871 | PPD                      |
| 261 | floralquinquenoside B <sup>*</sup>                                                               | C <sub>42</sub> H <sub>72</sub> O <sub>15</sub> | 816.4871 | PPT                      |
| 262 | floralquinquenoside C                                                                            | C <sub>42</sub> H <sub>72</sub> O <sub>15</sub> | 816.4871 | PPT                      |
| 263 | floralquinquenoside D <sup>*</sup>                                                               | C <sub>42</sub> H <sub>72</sub> O <sub>15</sub> | 816.4871 | PPD                      |
| 264 | ginsenoside Re <sub>5</sub>                                                                      | C <sub>42</sub> H <sub>72</sub> O <sub>15</sub> | 816.4871 | PPT                      |
| 265 | ginsenoside Rg <sub>12</sub>                                                                     | C <sub>42</sub> H <sub>72</sub> O <sub>15</sub> | 816.4871 | PPD                      |
| 266 | ginsenoside Rh <sub>21</sub>                                                                     | C <sub>42</sub> H <sub>72</sub> O <sub>15</sub> | 816.4871 | PPT                      |
| 267 | majonoside R1                                                                                    | C <sub>42</sub> H <sub>72</sub> O <sub>15</sub> | 816.4871 | OT                       |
| 268 | notoginsenoside SP1                                                                              | C <sub>42</sub> H <sub>72</sub> O <sub>15</sub> | 816.4871 | PPD                      |
| 269 | notoginsenoside SP11                                                                             | C <sub>42</sub> H <sub>72</sub> O <sub>15</sub> | 816.4871 | PPD                      |
| 270 | notoginsenoside SP2                                                                              | C <sub>42</sub> H <sub>72</sub> O <sub>15</sub> | 816.4871 | PPD                      |
| 271 | notoginsenoside SP3                                                                              | C <sub>42</sub> H <sub>72</sub> O <sub>15</sub> | 816.4871 | PPD                      |
| 272 | panajaponol A                                                                                    | C <sub>42</sub> H <sub>72</sub> O <sub>15</sub> | 816.4871 | PPT                      |

|     |                                                                                                            |                                                 |          |                       |
|-----|------------------------------------------------------------------------------------------------------------|-------------------------------------------------|----------|-----------------------|
| 273 | (20S,24S,25R)-6-O-[β-D-glucopyranosyl-(1→2)-β-D-glucopyranosyl]-dammar-20,24-epoxy-3β,6α,12β,25,26-pentaol | C <sub>42</sub> H <sub>72</sub> O <sub>16</sub> | 832.4820 | OT                    |
| 274 | floralginsenoside A                                                                                        | C <sub>42</sub> H <sub>72</sub> O <sub>16</sub> | 832.4820 | PPT                   |
| 275 | floralginsenoside B*                                                                                       | C <sub>42</sub> H <sub>72</sub> O <sub>16</sub> | 832.4820 | PPT                   |
| 276 | ursan-3β,19α,22β-triol-3-O-β-D-glucopyranosyl-(2'→1'')-β-D-glucopyranoside                                 | C <sub>42</sub> H <sub>73</sub> O <sub>13</sub> | 785.5051 | Miscellaneous         |
| 277 | 20(S) ginsenoside Rf2                                                                                      | C <sub>42</sub> H <sub>74</sub> O <sub>14</sub> | 802.5079 | PPT                   |
| 278 | quinquenoside L9                                                                                           | C <sub>42</sub> H <sub>74</sub> O <sub>15</sub> | 818.5028 | PPT                   |
| 279 | 24(S) vinaginsenoside R21                                                                                  | C <sub>42</sub> H <sub>74</sub> O <sub>16</sub> | 834.4977 | PPT                   |
| 280 | 24(R) vinaginsenoside R22                                                                                  | C <sub>42</sub> H <sub>74</sub> O <sub>16</sub> | 834.4977 | PPT                   |
| 281 | 6-O-[β-D-glucopyranosyl-(1→2)-β-D-glucopyranosyl]-dammar-3β,6α,12β,20S,24R,25-hexaol                       | C <sub>42</sub> H <sub>74</sub> O <sub>16</sub> | 834.4977 | PPT                   |
| 282 | 28-desglucosylchikusetsusaponin IVethyl ester                                                              | C <sub>43</sub> H <sub>68</sub> O <sub>13</sub> | 792.4660 | OA                    |
| 283 | chikusetsusaponin IVa methyl ester*                                                                        | C <sub>43</sub> H <sub>68</sub> O <sub>14</sub> | 808.4609 | OA                    |
| 284 | spinasaponin A methyl ester*                                                                               | C <sub>43</sub> H <sub>68</sub> O <sub>14</sub> | 808.4609 | OA                    |
| 285 | zingibroside R1 methyl ester*                                                                              | C <sub>43</sub> H <sub>68</sub> O <sub>14</sub> | 808.4609 | OA                    |
| 286 | 23-O-methylginsenoside-Rg11                                                                                | C <sub>43</sub> H <sub>72</sub> O <sub>14</sub> | 812.4922 | PPT                   |
| 287 | notoginsenoside SP17                                                                                       | C <sub>43</sub> H <sub>72</sub> O <sub>14</sub> | 812.4922 | PPD                   |
| 288 | sanchirrhinoside A2                                                                                        | C <sub>43</sub> H <sub>72</sub> O <sub>14</sub> | 812.4922 | PPT                   |
| 289 | 24(R) vinaginsenoside R2                                                                                   | C <sub>43</sub> H <sub>72</sub> O <sub>15</sub> | 828.4871 | OT                    |
| 290 | 24(S) vinaginsenoside R2*                                                                                  | C <sub>43</sub> H <sub>72</sub> O <sub>15</sub> | 828.4871 | OT                    |
| 291 | 20(R) methoxyl-ginsenoside Rg3                                                                             | C <sub>43</sub> H <sub>74</sub> O <sub>13</sub> | 789.5129 | PPD                   |
| 292 | 20(S) methoxyl-ginsenoside Rg3                                                                             | C <sub>43</sub> H <sub>74</sub> O <sub>13</sub> | 789.5129 | PPD                   |
| 293 | notoginsenoside SY4                                                                                        | C <sub>43</sub> H <sub>74</sub> O <sub>14</sub> | 815.5079 | PPD                   |
| 294 | notoginsenoside ST-2                                                                                       | C <sub>43</sub> H <sub>74</sub> O <sub>15</sub> | 830.5028 | PPD                   |
| 295 | notoginsenoside ST-3                                                                                       | C <sub>43</sub> H <sub>74</sub> O <sub>15</sub> | 830.5028 | PPD                   |
| 296 | dammar-9(11),24-dien-3β-ol-3α-L-arabinosyl-7α-octanoate                                                    | C <sub>43</sub> H <sub>75</sub> O <sub>7</sub>  | 703.5513 | Others                |
| 297 | 24(R) yesanchinoside A*                                                                                    | C <sub>44</sub> H <sub>74</sub> O <sub>16</sub> | 858.4977 | OT                    |
| 298 | 24(S) yesanchinoside A*                                                                                    | C <sub>44</sub> H <sub>74</sub> O <sub>16</sub> | 858.4977 | OT                    |
| 299 | chikusetsusaponin IVa ethyl ester*                                                                         | C <sub>44</sub> H <sub>70</sub> O <sub>14</sub> | 822.4766 | OA                    |
| 300 | zingibroside R1 ethyl ester                                                                                | C <sub>44</sub> H <sub>70</sub> O <sub>14</sub> | 822.4766 | OA                    |
| 301 | ginsenoside Rs <sub>4</sub>                                                                                | C <sub>44</sub> H <sub>72</sub> O <sub>13</sub> | 808.4973 | PPD                   |
| 302 | ginsenoside Rs <sub>5</sub> *                                                                              | C <sub>44</sub> H <sub>72</sub> O <sub>13</sub> | 808.4973 | PPD                   |
| 303 | notoginsenosides NL-D                                                                                      | C <sub>44</sub> H <sub>72</sub> O <sub>16</sub> | 856.482  | PPT                   |
| 304 | notoginsenoside NL-A <sub>4</sub>                                                                          | C <sub>44</sub> H <sub>72</sub> O <sub>17</sub> | 872.477  | PPD                   |
| 305 | acetylated Rg2                                                                                             | C <sub>44</sub> H <sub>74</sub> O <sub>14</sub> | 826.5079 | PPT                   |
| 306 | ginsenoside Rs <sub>3</sub> *                                                                              | C <sub>44</sub> H <sub>74</sub> O <sub>14</sub> | 826.5079 | PPD                   |
| 307 | 24(R) vinaginsenoside R1                                                                                   | C <sub>44</sub> H <sub>74</sub> O <sub>15</sub> | 842.5028 | OT                    |
| 308 | 24(S) vinaginsenoside R1*                                                                                  | C <sub>44</sub> H <sub>74</sub> O <sub>15</sub> | 842.5028 | OT                    |
| 309 | acetylginenoside Rf*                                                                                       | C <sub>44</sub> H <sub>74</sub> O <sub>15</sub> | 842.5028 | PPT                   |
| 310 | acetylginenoside Rg1*                                                                                      | C <sub>44</sub> H <sub>74</sub> O <sub>15</sub> | 842.5028 | PPT                   |
| 311 | vinaginsenoside R1*                                                                                        | C <sub>44</sub> H <sub>74</sub> O <sub>15</sub> | 842.5028 | OT                    |
| 312 | yesanchinoside D*                                                                                          | C <sub>44</sub> H <sub>74</sub> O <sub>15</sub> | 842.5028 | PPT                   |
| 313 | 28-desglucosylchikusetsusaponin IV butyl ester                                                             | C <sub>45</sub> H <sub>72</sub> O <sub>13</sub> | 820.4973 | OA                    |
| 314 | malonylginsenoside Rg5                                                                                     | C <sub>45</sub> H <sub>72</sub> O <sub>15</sub> | 852.4871 | PPD                   |
| 315 | malonylginsenoside Rg6                                                                                     | C <sub>45</sub> H <sub>72</sub> O <sub>15</sub> | 852.4871 | PPD                   |
| 316 | malonylginsenoside Rk1                                                                                     | C <sub>45</sub> H <sub>72</sub> O <sub>15</sub> | 852.4871 | C17 side-chain varied |
| 317 | malonylginsenoside Rg2                                                                                     | C <sub>45</sub> H <sub>74</sub> O <sub>16</sub> | 870.4977 | PPT                   |
| 318 | malonylginsenoside Rg3                                                                                     | C <sub>45</sub> H <sub>74</sub> O <sub>16</sub> | 870.4977 | PPD                   |
| 319 | malonylginsenoside Rf                                                                                      | C <sub>45</sub> H <sub>74</sub> O <sub>17</sub> | 886.4926 | PPT                   |

|     |                                     |                                                 |          |                          |
|-----|-------------------------------------|-------------------------------------------------|----------|--------------------------|
| 320 | malonylginsenoside Rg1*             | C <sub>45</sub> H <sub>74</sub> O <sub>17</sub> | 886.4926 | PPT                      |
| 321 | floralginsenoside Kb                | C <sub>45</sub> H <sub>76</sub> O <sub>19</sub> | 920.4981 | PPD                      |
| 322 | floralginsenoside Kc                | C <sub>45</sub> H <sub>76</sub> O <sub>20</sub> | 936.4930 | PPD                      |
| 323 | chikusetsusaponin IVa butyl ester*  | C <sub>46</sub> H <sub>74</sub> O <sub>14</sub> | 850.5079 | OA                       |
| 324 | zingibroside R1 butyl ester         | C <sub>46</sub> H <sub>74</sub> O <sub>14</sub> | 850.5079 | OA                       |
| 325 | ginsenoside Re <sub>6</sub>         | C <sub>46</sub> H <sub>76</sub> O <sub>15</sub> | 868.5184 | PPT                      |
| 326 | koryoginenoside R1                  | C <sub>46</sub> H <sub>76</sub> O <sub>15</sub> | 868.5184 | PPT                      |
| 327 | chikusetsusaponin L <sub>5</sub> *  | C <sub>46</sub> H <sub>78</sub> O <sub>17</sub> | 902.5239 | PPT                      |
| 328 | chikusetsusaponin LM <sub>2</sub> * | C <sub>46</sub> H <sub>78</sub> O <sub>17</sub> | 902.5239 | PPT                      |
| 329 | chikusetsusaponin LM <sub>3</sub> * | C <sub>46</sub> H <sub>78</sub> O <sub>17</sub> | 902.5239 | PPT                      |
| 330 | notoginsenoside Rw <sub>1</sub>     | C <sub>46</sub> H <sub>78</sub> O <sub>17</sub> | 902.5239 | PPT                      |
| 331 | vinaginsenoside R2*                 | C <sub>47</sub> H <sub>70</sub> O <sub>13</sub> | 842.4816 | OT                       |
| 332 | chikusetsusaponin Ib*               | C <sub>47</sub> H <sub>74</sub> O <sub>18</sub> | 926.4875 | OA                       |
| 333 | Chikusetsusaponin IV*               | C <sub>47</sub> H <sub>74</sub> O <sub>18</sub> | 926.4875 | OA                       |
| 334 | pjs-2*                              | C <sub>47</sub> H <sub>74</sub> O <sub>18</sub> | 926.4875 | OA                       |
| 335 | pseudoginsenoside Rt1*              | C <sub>47</sub> H <sub>74</sub> O <sub>18</sub> | 926.4875 | OA                       |
| 336 | stipuleanoside R1*                  | C <sub>47</sub> H <sub>74</sub> O <sub>18</sub> | 926.4875 | OA                       |
| 337 | notoginsenoside Sft10               | C <sub>47</sub> H <sub>78</sub> O <sub>16</sub> | 898.5290 | C17 side-chain<br>varied |
| 338 | chikusetsusaponin FT <sub>4</sub> * | C <sub>47</sub> H <sub>78</sub> O <sub>17</sub> | 914.5239 | Others                   |
| 339 | notoginsenoside LX                  | C <sub>47</sub> H <sub>78</sub> O <sub>17</sub> | 914.5239 | PPD                      |
| 340 | notoginsenoside Ng <sub>1</sub>     | C <sub>47</sub> H <sub>78</sub> O <sub>17</sub> | 914.5239 | PPD                      |
| 341 | notoginsenoside SY2                 | C <sub>47</sub> H <sub>78</sub> O <sub>17</sub> | 914.5239 | PPD                      |
| 342 | notoginsenoside NL-C <sub>1</sub>   | C <sub>47</sub> H <sub>78</sub> O <sub>18</sub> | 930.5188 | PPD                      |
| 343 | notoginsenoside NL-C <sub>2</sub>   | C <sub>47</sub> H <sub>78</sub> O <sub>18</sub> | 930.5188 | PPD                      |
| 344 | 24(R) yesanchinoside C*             | C <sub>47</sub> H <sub>80</sub> O <sub>19</sub> | 948.5294 | OT                       |
| 345 | 24(S) yesanchinoside C*             | C <sub>47</sub> H <sub>80</sub> O <sub>19</sub> | 948.5294 | OT                       |
| 346 | chikusetsusaponin III*              | C <sub>47</sub> H <sub>80</sub> O <sub>17</sub> | 916.5396 | PPD                      |
| 347 | ginsenoside Mb                      | C <sub>47</sub> H <sub>80</sub> O <sub>17</sub> | 916.5396 | PPD                      |
| 348 | ginsenoside Rd <sub>2</sub>         | C <sub>47</sub> H <sub>80</sub> O <sub>17</sub> | 916.5396 | PPD                      |
| 349 | ginsenoside Rh <sub>24</sub>        | C <sub>47</sub> H <sub>80</sub> O <sub>17</sub> | 916.5396 | PPT                      |
| 350 | gypenoside IX                       | C <sub>47</sub> H <sub>80</sub> O <sub>17</sub> | 916.5396 | PPD                      |
| 351 | notoginsenoside Fe*                 | C <sub>47</sub> H <sub>80</sub> O <sub>17</sub> | 916.5396 | PPD                      |
| 352 | notoginsenoside Ft <sub>1</sub>     | C <sub>47</sub> H <sub>80</sub> O <sub>17</sub> | 916.5396 | PPD                      |
| 353 | quinquenoside L10                   | C <sub>47</sub> H <sub>80</sub> O <sub>17</sub> | 916.5396 | PPD                      |
| 354 | quinquenoside L14                   | C <sub>47</sub> H <sub>80</sub> O <sub>17</sub> | 916.5396 | PPD                      |
| 355 | vinaginsenoside R16*                | C <sub>47</sub> H <sub>80</sub> O <sub>17</sub> | 916.5396 | PPD                      |
| 356 | vinaginsenoside R17*                | C <sub>47</sub> H <sub>80</sub> O <sub>17</sub> | 916.5396 | PPD                      |
| 357 | vinaginsenoside R18                 | C <sub>47</sub> H <sub>80</sub> O <sub>17</sub> | 916.5396 | PPD                      |
| 358 | notoginsenoside NL-H <sub>1</sub>   | C <sub>47</sub> H <sub>80</sub> O <sub>18</sub> | 932.5345 | PPD                      |
| 359 | 20(S) sanchirrhinoside A5           | C <sub>47</sub> H <sub>80</sub> O <sub>18</sub> | 932.5345 | PPT                      |
| 360 | ginsenoside Re <sub>4</sub> *       | C <sub>47</sub> H <sub>80</sub> O <sub>18</sub> | 932.5345 | PPT                      |
| 361 | notoginsenoside Fp <sub>1</sub> *   | C <sub>47</sub> H <sub>80</sub> O <sub>18</sub> | 932.5345 | PPT                      |
| 362 | notoginsenoside Ft <sub>3</sub>     | C <sub>47</sub> H <sub>80</sub> O <sub>18</sub> | 932.5345 | PPD                      |
| 363 | notoginsenoside LK <sub>8</sub>     | C <sub>47</sub> H <sub>80</sub> O <sub>18</sub> | 932.5345 | PPD                      |
| 364 | notoginsenoside NL-B <sub>1</sub>   | C <sub>47</sub> H <sub>80</sub> O <sub>18</sub> | 932.5345 | PPD                      |
| 365 | notoginsenoside NL-G <sub>1</sub>   | C <sub>47</sub> H <sub>80</sub> O <sub>18</sub> | 932.5345 | PPD                      |
| 366 | notoginsenoside NL-H <sub>2</sub>   | C <sub>47</sub> H <sub>80</sub> O <sub>18</sub> | 932.5345 | PPD                      |
| 367 | notoginsenoside R1*                 | C <sub>47</sub> H <sub>80</sub> O <sub>18</sub> | 932.5345 | PPT                      |
| 368 | notoginsenoside ST-5                | C <sub>47</sub> H <sub>80</sub> O <sub>18</sub> | 932.5345 | PPD                      |
| 369 | quinquenoside F6                    | C <sub>47</sub> H <sub>80</sub> O <sub>18</sub> | 932.5345 | PPT                      |
| 370 | quinquenoside L17*                  | C <sub>47</sub> H <sub>80</sub> O <sub>18</sub> | 932.5345 | PPT                      |
| 371 | quinquenoside L3                    | C <sub>47</sub> H <sub>80</sub> O <sub>18</sub> | 932.5345 | PPD                      |
| 372 | notoginsenoside H                   | C <sub>47</sub> H <sub>80</sub> O <sub>19</sub> | 948.5294 | PPT                      |

|     |                                                                      |                                                 |          |                          |
|-----|----------------------------------------------------------------------|-------------------------------------------------|----------|--------------------------|
| 373 | notoginsenoside NL-A <sub>1</sub>                                    | C <sub>47</sub> H <sub>80</sub> O <sub>19</sub> | 948.5294 | PPD                      |
| 374 | notoginsenoside NL-A <sub>2</sub>                                    | C <sub>47</sub> H <sub>80</sub> O <sub>19</sub> | 948.5294 | PPD                      |
| 375 | notoginsenoside SFt9                                                 | C <sub>47</sub> H <sub>80</sub> O <sub>19</sub> | 948.5294 | C17 side-chain<br>varied |
| 376 | vinaginsenoside R5                                                   | C <sub>47</sub> H <sub>80</sub> O <sub>19</sub> | 948.5294 | OT                       |
| 377 | vinaginsenoside R6*                                                  | C <sub>47</sub> H <sub>80</sub> O <sub>19</sub> | 948.5294 | OT                       |
| 378 | 3β,4α,12β-trihydroxystigmast-5-en-21-<br>yloctadecan-9',12'-dienoate | C <sub>47</sub> H <sub>80</sub> O <sub>5</sub>  | 724.6006 | Others                   |
| 379 | notoginsenoside Ft <sub>2</sub>                                      | C <sub>47</sub> H <sub>82</sub> O <sub>18</sub> | 934.5501 | PPD                      |
| 380 | notoginsenoside NL-E <sub>1</sub>                                    | C <sub>47</sub> H <sub>82</sub> O <sub>19</sub> | 950.545  | PPD                      |
| 381 | chikusetsusaponin IV methyl ester*                                   | C <sub>48</sub> H <sub>76</sub> O <sub>18</sub> | 940.5032 | OA                       |
| 382 | araloside A methyl ester                                             | C <sub>48</sub> H <sub>76</sub> O <sub>18</sub> | 940.5032 | OA                       |
| 383 | bipinoside B                                                         | C <sub>48</sub> H <sub>76</sub> O <sub>18</sub> | 940.5032 | OA                       |
| 384 | pseudoginsenoside Rt <sub>1</sub> methyl ester*                      | C <sub>48</sub> H <sub>76</sub> O <sub>18</sub> | 940.5032 | OA                       |
| 385 | chikusetsusaponin V*                                                 | C <sub>48</sub> H <sub>76</sub> O <sub>19</sub> | 956.4981 | OA                       |
| 386 | hemsgiganoside B*                                                    | C <sub>48</sub> H <sub>76</sub> O <sub>19</sub> | 956.4981 | OA                       |
| 387 | spinasaponin A 28-O-glucoside                                        | C <sub>48</sub> H <sub>76</sub> O <sub>19</sub> | 956.4981 | OA                       |
| 388 | tuberoside A*                                                        | C <sub>48</sub> H <sub>76</sub> O <sub>19</sub> | 956.4981 | OA                       |
| 389 | 5,6-didehydroginsenoside Rd                                          | C <sub>48</sub> H <sub>80</sub> O <sub>18</sub> | 944.5345 | Miscellaneous            |
| 390 | chikusetsusaponin FK <sub>2</sub> *                                  | C <sub>48</sub> H <sub>80</sub> O <sub>18</sub> | 944.5345 | Miscellaneous            |
| 391 | ginsenoside Rh <sub>18</sub>                                         | C <sub>48</sub> H <sub>80</sub> O <sub>18</sub> | 944.5345 | PPT                      |
| 392 | quinquefoloside Ld                                                   | C <sub>48</sub> H <sub>80</sub> O <sub>18</sub> | 944.5345 | PPT                      |
| 393 | quinquefoloside Le                                                   | C <sub>48</sub> H <sub>80</sub> O <sub>18</sub> | 944.5345 | PPD                      |
| 394 | quinquenoside L1*                                                    | C <sub>48</sub> H <sub>80</sub> O <sub>18</sub> | 944.5345 | PPD                      |
| 395 | ginsenoside III*                                                     | C <sub>48</sub> H <sub>80</sub> O <sub>19</sub> | 960.5294 | PPD                      |
| 396 | notoginsenoside G*                                                   | C <sub>48</sub> H <sub>80</sub> O <sub>19</sub> | 960.5294 | Miscellaneous            |
| 397 | vinaginsenoside R20                                                  | C <sub>48</sub> H <sub>80</sub> O <sub>19</sub> | 960.5294 | PPT                      |
| 398 | vinaginsenoside R3*                                                  | C <sub>48</sub> H <sub>82</sub> O <sub>17</sub> | 930.5552 | Miscellaneous            |
| 399 | chikusetsusaponin FK <sub>1</sub> *                                  | C <sub>48</sub> H <sub>82</sub> O <sub>18</sub> | 946.5501 | PPT                      |
| 400 | chikusetsusaponin FK <sub>7</sub> *                                  | C <sub>48</sub> H <sub>82</sub> O <sub>18</sub> | 946.5501 | PPD                      |
| 401 | ginsenoside Rd*                                                      | C <sub>48</sub> H <sub>82</sub> O <sub>18</sub> | 946.5501 | PPD                      |
| 402 | ginsenoside Re*                                                      | C <sub>48</sub> H <sub>82</sub> O <sub>18</sub> | 946.5501 | PPT                      |
| 403 | notoginsenoside K*                                                   | C <sub>48</sub> H <sub>82</sub> O <sub>18</sub> | 946.5501 | PPD                      |
| 404 | ginsenoside Rd <sub>6</sub>                                          | C <sub>48</sub> H <sub>82</sub> O <sub>18</sub> | 946.5501 | PPD                      |
| 405 | ginsenoside Rg <sub>18</sub>                                         | C <sub>48</sub> H <sub>82</sub> O <sub>18</sub> | 946.5501 | PPT                      |
| 406 | 7β-hydroxyl ginsenoside Rd                                           | C <sub>48</sub> H <sub>82</sub> O <sub>19</sub> | 962.5450 | PPD                      |
| 407 | majoroside F1                                                        | C <sub>48</sub> H <sub>82</sub> O <sub>19</sub> | 962.5450 | PPD                      |
| 408 | 20-glc-ginsenoside-Rf*                                               | C <sub>48</sub> H <sub>82</sub> O <sub>19</sub> | 962.5450 | PPT                      |
| 409 | chikusetsusaponin LM4*                                               | C <sub>48</sub> H <sub>82</sub> O <sub>19</sub> | 962.5450 | PPT                      |
| 410 | floralginsenoside La                                                 | C <sub>48</sub> H <sub>82</sub> O <sub>19</sub> | 962.5450 | PPT                      |
| 411 | floralginsenoside Lb                                                 | C <sub>48</sub> H <sub>82</sub> O <sub>19</sub> | 962.5450 | PPT                      |
| 412 | ginsenoside Re <sub>1</sub> *                                        | C <sub>48</sub> H <sub>82</sub> O <sub>19</sub> | 962.5450 | PPT                      |
| 413 | ginsenoside Re <sub>2</sub> *                                        | C <sub>48</sub> H <sub>82</sub> O <sub>19</sub> | 962.5450 | PPT                      |
| 414 | ginsenoside Re <sub>3</sub> *                                        | C <sub>48</sub> H <sub>82</sub> O <sub>19</sub> | 962.5450 | PPT                      |
| 415 | ginsenoside Re <sub>7</sub>                                          | C <sub>48</sub> H <sub>82</sub> O <sub>19</sub> | 962.5450 | PPT                      |
| 416 | majoroside F5                                                        | C <sub>48</sub> H <sub>82</sub> O <sub>19</sub> | 962.5450 | PPT                      |
| 417 | majoroside F6                                                        | C <sub>48</sub> H <sub>82</sub> O <sub>19</sub> | 962.5450 | PPT                      |
| 418 | notoginsenoside M*                                                   | C <sub>48</sub> H <sub>82</sub> O <sub>19</sub> | 962.5450 | PPT                      |
| 419 | notoginsenoside N*                                                   | C <sub>48</sub> H <sub>82</sub> O <sub>19</sub> | 962.5450 | PPT                      |
| 420 | notoginsenoside R3*                                                  | C <sub>48</sub> H <sub>82</sub> O <sub>19</sub> | 962.5450 | PPT                      |
| 421 | notoginsenoside R6*                                                  | C <sub>48</sub> H <sub>82</sub> O <sub>19</sub> | 962.5450 | PPT                      |
| 422 | quinquenoside L2                                                     | C <sub>48</sub> H <sub>82</sub> O <sub>19</sub> | 962.5450 | PPD                      |
| 423 | vinaginsenoside R24                                                  | C <sub>48</sub> H <sub>82</sub> O <sub>19</sub> | 962.5450 | PPD                      |
| 424 | vinaginsenoside R4                                                   | C <sub>48</sub> H <sub>82</sub> O <sub>19</sub> | 962.5450 | PPT                      |

|     |                                                                                                                                                                                            |                                                 |           |               |
|-----|--------------------------------------------------------------------------------------------------------------------------------------------------------------------------------------------|-------------------------------------------------|-----------|---------------|
| 425 | vinaginsenoside R8                                                                                                                                                                         | C <sub>48</sub> H <sub>82</sub> O <sub>19</sub> | 962.5450  | PPD           |
| 426 | vinaginsenoside R9                                                                                                                                                                         | C <sub>48</sub> H <sub>82</sub> O <sub>19</sub> | 962.5450  | PPD           |
| 427 | bipinnatifidusoside F2                                                                                                                                                                     | C <sub>48</sub> H <sub>82</sub> O <sub>20</sub> | 978.5399  | PPT           |
| 428 | floralginsenoside I                                                                                                                                                                        | C <sub>48</sub> H <sub>82</sub> O <sub>20</sub> | 978.5399  | PPT           |
| 429 | floralginsenoside J                                                                                                                                                                        | C <sub>48</sub> H <sub>82</sub> O <sub>20</sub> | 978.5399  | PPT           |
| 430 | floralginsenoside K                                                                                                                                                                        | C <sub>48</sub> H <sub>82</sub> O <sub>20</sub> | 978.5399  | PPT           |
| 431 | ginsenoside I                                                                                                                                                                              | C <sub>48</sub> H <sub>82</sub> O <sub>20</sub> | 978.5399  | PPD           |
| 432 | ginsenoside II                                                                                                                                                                             | C <sub>48</sub> H <sub>82</sub> O <sub>20</sub> | 978.5399  | PPD           |
| 433 | ginsenoside S <sub>4</sub>                                                                                                                                                                 | C <sub>48</sub> H <sub>82</sub> O <sub>20</sub> | 978.5399  | PPT           |
| 434 | notoginsenoside E                                                                                                                                                                          | C <sub>48</sub> H <sub>82</sub> O <sub>20</sub> | 978.5399  | PPD           |
| 435 | yesanchinoside B*                                                                                                                                                                          | C <sub>48</sub> H <sub>82</sub> O <sub>20</sub> | 978.5399  | OT            |
| 436 | ginsenoside S <sub>3</sub>                                                                                                                                                                 | C <sub>48</sub> H <sub>84</sub> O <sub>20</sub> | 980.5556  | PPT           |
| 437 | vinaginsenoside R13                                                                                                                                                                        | C <sub>48</sub> H <sub>84</sub> O <sub>20</sub> | 980.5556  | PPD           |
| 438 | taibaienoside II*                                                                                                                                                                          | C <sub>49</sub> H <sub>78</sub> O <sub>18</sub> | 954.5188  | OA            |
| 439 | pseudoginsenoside Rt1 ethyl ester                                                                                                                                                          | C <sub>49</sub> H <sub>78</sub> O <sub>18</sub> | 954.5188  | OA            |
| 440 | chikusetsusaponinV methyl ester*                                                                                                                                                           | C <sub>49</sub> H <sub>78</sub> O <sub>19</sub> | 970.5137  | OA            |
| 441 | chikusetsusaponinV ethyl ester*                                                                                                                                                            | C <sub>50</sub> H <sub>80</sub> O <sub>19</sub> | 984.5294  | OA            |
| 442 | malonylginsenoside Re4                                                                                                                                                                     | C <sub>50</sub> H <sub>82</sub> O <sub>21</sub> | 1018.5349 | PPT           |
| 443 | acetylginsenoside Re*                                                                                                                                                                      | C <sub>50</sub> H <sub>84</sub> O <sub>19</sub> | 988.5607  | PPT           |
| 444 | pseudoginsenoside Rc1                                                                                                                                                                      | C <sub>50</sub> H <sub>84</sub> O <sub>19</sub> | 988.5607  | PPD           |
| 445 | pseudoginsenoside Rs1*                                                                                                                                                                     | C <sub>50</sub> H <sub>84</sub> O <sub>19</sub> | 988.5607  | PPT           |
| 446 | quinquenoside III                                                                                                                                                                          | C <sub>50</sub> H <sub>84</sub> O <sub>19</sub> | 988.5607  | PPD           |
| 447 | acetylginsenoside Rg3                                                                                                                                                                      | C <sub>50</sub> H <sub>84</sub> O <sub>20</sub> | 1004.5556 | PPT           |
| 448 | floralginsenoside G                                                                                                                                                                        | C <sub>50</sub> H <sub>84</sub> O <sub>21</sub> | 1020.5505 | PPD           |
| 449 | floralginsenoside H                                                                                                                                                                        | C <sub>50</sub> H <sub>84</sub> O <sub>21</sub> | 1020.5505 | PPT           |
| 450 | pseudoginsenoside Rt1 butyl ester*                                                                                                                                                         | C <sub>51</sub> H <sub>82</sub> O <sub>18</sub> | 982.5501  | OA            |
| 451 | taibaienoside I*                                                                                                                                                                           | C <sub>51</sub> H <sub>82</sub> O <sub>18</sub> | 982.5501  | OA            |
| 452 | epoxynotoginsenoside A                                                                                                                                                                     | C <sub>51</sub> H <sub>84</sub> O <sub>21</sub> | 1032.5505 | Others        |
| 453 | malonylfloralginsenoside Re1*                                                                                                                                                              | C <sub>51</sub> H <sub>84</sub> O <sub>21</sub> | 1032.5505 | PPT           |
| 454 | malonylginsenoside Rd*                                                                                                                                                                     | C <sub>51</sub> H <sub>84</sub> O <sub>21</sub> | 1032.5505 | PPD           |
| 455 | malonylfloralginsenoside Rd1                                                                                                                                                               | C <sub>51</sub> H <sub>84</sub> O <sub>21</sub> | 1032.5505 | PPD           |
| 456 | malonylfloralginsenoside Rd2                                                                                                                                                               | C <sub>51</sub> H <sub>84</sub> O <sub>21</sub> | 1032.5505 | PPD           |
| 457 | malonylfloralginsenoside Rd3                                                                                                                                                               | C <sub>51</sub> H <sub>84</sub> O <sub>21</sub> | 1032.5505 | PPD           |
| 458 | malonylfloralginsenoside Rd4                                                                                                                                                               | C <sub>51</sub> H <sub>84</sub> O <sub>21</sub> | 1032.5505 | PPD           |
| 459 | malonylfloralginsenoside Rd5                                                                                                                                                               | C <sub>51</sub> H <sub>84</sub> O <sub>21</sub> | 1032.5505 | PPD           |
| 460 | malonylfloralginsenoside Re2                                                                                                                                                               | C <sub>51</sub> H <sub>84</sub> O <sub>21</sub> | 1032.5505 | PPT           |
| 461 | malonylfloralginsenoside Re3                                                                                                                                                               | C <sub>51</sub> H <sub>84</sub> O <sub>21</sub> | 1032.5505 | PPT           |
| 462 | malonylginsenoside Rd6                                                                                                                                                                     | C <sub>51</sub> H <sub>84</sub> O <sub>21</sub> | 1032.5505 | PPD           |
| 463 | malonylginsenoside Re                                                                                                                                                                      | C <sub>51</sub> H <sub>84</sub> O <sub>21</sub> | 1032.5505 | PPT           |
| 464 | malonylginsenoside Re2                                                                                                                                                                     | C <sub>51</sub> H <sub>84</sub> O <sub>22</sub> | 1048.5454 | PPT           |
| 465 | malonylginsenoside Re3                                                                                                                                                                     | C <sub>51</sub> H <sub>84</sub> O <sub>22</sub> | 1048.5454 | PPT           |
| 466 | chikusetsusaponin V butyl ester*                                                                                                                                                           | C <sub>52</sub> H <sub>84</sub> O <sub>19</sub> | 1012.5607 | OA            |
| 467 | 3-O- $\{\beta$ -D-xylopyranosyl(1 $\rightarrow$ 3)- $[\alpha$ -l-arabinofuranosyl(1 $\rightarrow$ 4)]- $\beta$ -D-glucopyranosyl $\}$ oleanolic acid 28-O- $\beta$ -D-glucopyranosyl ester | C <sub>52</sub> H <sub>84</sub> O <sub>21</sub> | 1044.5505 | Miscellaneous |
| 468 | ginsenoside Rh <sub>26</sub>                                                                                                                                                               | C <sub>52</sub> H <sub>86</sub> O <sub>19</sub> | 1014.5763 | PPD           |
| 469 | quinquenoside I                                                                                                                                                                            | C <sub>52</sub> H <sub>86</sub> O <sub>19</sub> | 1014.5763 | PPD           |
| 470 | ginsenoside Rh <sub>25</sub>                                                                                                                                                               | C <sub>52</sub> H <sub>88</sub> O <sub>21</sub> | 1048.5818 | PPD           |
| 471 | gypenoside XV                                                                                                                                                                              | C <sub>52</sub> H <sub>88</sub> O <sub>21</sub> | 1048.5818 | PPD           |
| 472 | notoginsenoside O                                                                                                                                                                          | C <sub>52</sub> H <sub>88</sub> O <sub>21</sub> | 1048.5818 | PPD           |
| 473 | notoginsenoside P                                                                                                                                                                          | C <sub>52</sub> H <sub>88</sub> O <sub>21</sub> | 1048.5818 | PPD           |
| 474 | chikusetsusaponin VII*                                                                                                                                                                     | C <sub>53</sub> H <sub>90</sub> O <sub>22</sub> | 1078.5924 | PPD           |
| 475 | bipinoside C                                                                                                                                                                               | C <sub>53</sub> H <sub>84</sub> O <sub>22</sub> | 1072.5454 | OA            |

|     |                                                                                                                                |                                                 |           |               |
|-----|--------------------------------------------------------------------------------------------------------------------------------|-------------------------------------------------|-----------|---------------|
| 476 | Stipuleanoside R2*                                                                                                             | C <sub>53</sub> H <sub>84</sub> O <sub>23</sub> | 1088.5403 | OA            |
| 477 | chikusetsusaponin FK <sub>3</sub> *                                                                                            | C <sub>53</sub> H <sub>88</sub> O <sub>22</sub> | 1076.5767 | Miscellaneous |
| 478 | chikusetsusaponin FK <sub>6</sub> *                                                                                            | C <sub>53</sub> H <sub>88</sub> O <sub>22</sub> | 1076.5767 | PPD           |
| 479 | quinquefoloside Lb                                                                                                             | C <sub>53</sub> H <sub>88</sub> O <sub>22</sub> | 1076.5767 | PPD           |
| 480 | notoginsenoside LK <sub>1</sub>                                                                                                | C <sub>53</sub> H <sub>88</sub> O <sub>23</sub> | 1092.5716 | PPD           |
| 481 | notoginsenoside Ng <sub>2</sub>                                                                                                | C <sub>53</sub> H <sub>88</sub> O <sub>23</sub> | 1092.5716 | PPD           |
| 482 | notoginsenoside NL-C <sub>3</sub>                                                                                              | C <sub>53</sub> H <sub>88</sub> O <sub>23</sub> | 1092.5716 | PPD           |
| 483 | yesanchinoside G*                                                                                                              | C <sub>53</sub> H <sub>88</sub> O <sub>23</sub> | 1092.5716 | Miscellaneous |
| 484 | floralginsenoside M*                                                                                                           | C <sub>53</sub> H <sub>90</sub> O <sub>22</sub> | 1078.5924 | PPT           |
| 485 | floralginsenoside N*                                                                                                           | C <sub>53</sub> H <sub>90</sub> O <sub>22</sub> | 1078.5924 | PPT           |
| 486 | floralquinquenoside E                                                                                                          | C <sub>53</sub> H <sub>90</sub> O <sub>22</sub> | 1078.5924 | PPT           |
| 487 | ginsenoside Rb <sub>2</sub> *                                                                                                  | C <sub>53</sub> H <sub>90</sub> O <sub>22</sub> | 1078.5924 | PPD           |
| 488 | ginsenoside Rb <sub>3</sub> *                                                                                                  | C <sub>53</sub> H <sub>90</sub> O <sub>22</sub> | 1078.5924 | PPD           |
| 489 | ginsenoside Rc*                                                                                                                | C <sub>53</sub> H <sub>90</sub> O <sub>22</sub> | 1078.5924 | PPD           |
| 490 | notoginsenoside L                                                                                                              | C <sub>53</sub> H <sub>90</sub> O <sub>22</sub> | 1078.5924 | PPD           |
| 491 | vinaginsenoside R7*                                                                                                            | C <sub>53</sub> H <sub>90</sub> O <sub>22</sub> | 1078.5924 | PPD           |
| 492 | 20(S) sanchirrhinoside A <sub>6</sub>                                                                                          | C <sub>53</sub> H <sub>90</sub> O <sub>23</sub> | 1094.5873 | PPT           |
| 493 | chikusetsusaponin LM <sub>5</sub> *                                                                                            | C <sub>53</sub> H <sub>90</sub> O <sub>23</sub> | 1094.5873 | PPT           |
| 494 | floralginsenoside P*                                                                                                           | C <sub>53</sub> H <sub>90</sub> O <sub>23</sub> | 1094.5873 | PPT           |
| 495 | floranotoginsenoside A                                                                                                         | C <sub>53</sub> H <sub>90</sub> O <sub>23</sub> | 1094.5873 | PPD           |
| 496 | floranotoginsenoside D                                                                                                         | C <sub>53</sub> H <sub>90</sub> O <sub>23</sub> | 1094.5873 | PPD           |
| 497 | gypenoside LXXI                                                                                                                | C <sub>53</sub> H <sub>90</sub> O <sub>23</sub> | 1094.5873 | PPD           |
| 498 | notoginsenoside LK <sub>6</sub>                                                                                                | C <sub>53</sub> H <sub>90</sub> O <sub>23</sub> | 1094.5873 | PPD           |
| 499 | notoginsenoside LK <sub>7</sub>                                                                                                | C <sub>53</sub> H <sub>90</sub> O <sub>23</sub> | 1094.5873 | PPD           |
| 500 | yesanchinoside H*                                                                                                              | C <sub>53</sub> H <sub>90</sub> O <sub>23</sub> | 1094.5873 | PPD           |
| 501 | floralginsenoside O                                                                                                            | C <sub>53</sub> H <sub>90</sub> O <sub>24</sub> | 1110.5822 | PPD           |
| 502 | floralginsenoside T <sub>c</sub>                                                                                               | C <sub>53</sub> H <sub>90</sub> O <sub>24</sub> | 1110.5822 | PPD           |
| 503 | floralginsenoside T <sub>d</sub>                                                                                               | C <sub>53</sub> H <sub>90</sub> O <sub>24</sub> | 1110.5822 | PPD           |
| 504 | floranotoginsenoside B                                                                                                         | C <sub>53</sub> H <sub>90</sub> O <sub>24</sub> | 1110.5822 | PPD           |
| 505 | floranotoginsenoside C                                                                                                         | C <sub>53</sub> H <sub>90</sub> O <sub>24</sub> | 1110.5822 | PPD           |
| 506 | chikusetsusaponin FM <sub>1</sub> *                                                                                            | C <sub>53</sub> H <sub>92</sub> O <sub>24</sub> | 1112.5979 | PPD           |
| 507 | notoginsenosides NL-E <sub>2</sub>                                                                                             | C <sub>53</sub> H <sub>92</sub> O <sub>24</sub> | 1112.5979 | PPD           |
| 508 | notoginsenosides NL-F <sub>1</sub>                                                                                             | C <sub>53</sub> H <sub>92</sub> O <sub>24</sub> | 1112.5979 | PPD           |
| 509 | stipuleanoside R2 methyl ester                                                                                                 | C <sub>54</sub> H <sub>86</sub> O <sub>23</sub> | 1102.5560 | OA            |
| 510 | malonylfloralginsenoside Rd <sub>6</sub> *                                                                                     | C <sub>54</sub> H <sub>86</sub> O <sub>24</sub> | 1118.5509 | PPD           |
| 511 | 5,6-didehydroginsenoside Rb <sub>1</sub>                                                                                       | C <sub>54</sub> H <sub>90</sub> O <sub>23</sub> | 1106.5873 | Miscellaneous |
| 512 | notoginsenoside B*                                                                                                             | C <sub>54</sub> H <sub>90</sub> O <sub>24</sub> | 1122.5822 | PPD           |
| 513 | quinquenoside IV                                                                                                               | C <sub>54</sub> H <sub>90</sub> O <sub>24</sub> | 1122.5822 | Miscellaneous |
| 514 | notoginsenoside I                                                                                                              | C <sub>54</sub> H <sub>92</sub> O <sub>22</sub> | 1092.608  | Miscellaneous |
| 515 | ginsenoside B <sub>1</sub> *                                                                                                   | C <sub>54</sub> H <sub>92</sub> O <sub>23</sub> | 1108.6029 | PPD           |
| 516 | ginsenoside Rb <sub>1</sub> *                                                                                                  | C <sub>54</sub> H <sub>92</sub> O <sub>23</sub> | 1108.6029 | PPD           |
| 517 | ginsenoside Re*                                                                                                                | C <sub>54</sub> H <sub>92</sub> O <sub>23</sub> | 1108.6029 | PPT           |
| 518 | quinquefoloside La                                                                                                             | C <sub>54</sub> H <sub>92</sub> O <sub>23</sub> | 1108.6029 | PPD           |
| 519 | quinquefoloside Lc                                                                                                             | C <sub>54</sub> H <sub>92</sub> O <sub>23</sub> | 1108.6029 | PPD           |
| 520 | quinquenoside Ja                                                                                                               | C <sub>54</sub> H <sub>92</sub> O <sub>23</sub> | 1108.6029 | PPT           |
| 521 | yesanchinoside E*                                                                                                              | C <sub>54</sub> H <sub>92</sub> O <sub>23</sub> | 1108.6029 | PPT           |
| 522 | ginsenoside Rb <sub>4</sub>                                                                                                    | C <sub>54</sub> H <sub>92</sub> O <sub>23</sub> | 1108.6029 | PPD           |
| 523 | 6-O-[[β-D-glucopyranosyl-(1→2)-β-D-glucopyranosyl]-20-O-[[β-D-glucopyranosyl-(1→4)-β-D-glucopyranosyl]-20(S) protopanaxatriol* | C <sub>54</sub> H <sub>92</sub> O <sub>24</sub> | 1124.5979 | PPT           |
| 524 | ginsenoside V                                                                                                                  | C <sub>54</sub> H <sub>92</sub> O <sub>24</sub> | 1124.5979 | PPD           |
| 525 | koryoginsenoside R2                                                                                                            | C <sub>54</sub> H <sub>92</sub> O <sub>24</sub> | 1124.5979 | PPD           |
| 526 | notoginsenoside A                                                                                                              | C <sub>54</sub> H <sub>92</sub> O <sub>24</sub> | 1124.5979 | PPD           |
| 527 | notoginsenoside C                                                                                                              | C <sub>54</sub> H <sub>92</sub> O <sub>25</sub> | 1140.5928 | PPD           |



|     |                                                                                                                                                                                          |                                                  |           |               |
|-----|------------------------------------------------------------------------------------------------------------------------------------------------------------------------------------------|--------------------------------------------------|-----------|---------------|
| 528 | ursan-3 $\alpha$ ,11 $\beta$ -diol-3-O- $\alpha$ -D-glucopyranosyl-(6'→1'')- $\alpha$ -D-glucopyranosyl-(6''→1''')- $\alpha$ -D-glucopyranosyl-(6'''→1'''')- $\alpha$ -D-glucopyranoside | C <sub>54</sub> H <sub>93</sub> O <sub>22</sub>  | 1093.6158 | Miscellaneous |
| 529 | quinquenoside L16                                                                                                                                                                        | C <sub>54</sub> H <sub>94</sub> O <sub>25</sub>  | 1142.6084 | PPD           |
| 530 | ginsenoside Rs <sub>1</sub> *                                                                                                                                                            | C <sub>55</sub> H <sub>92</sub> O <sub>23</sub>  | 1120.6029 | PPD           |
| 531 | ginsenoside Rs <sub>11</sub>                                                                                                                                                             | C <sub>55</sub> H <sub>92</sub> O <sub>23</sub>  | 1120.6029 | PPD           |
| 532 | ginsenoside Rs <sub>2</sub> *                                                                                                                                                            | C <sub>55</sub> H <sub>92</sub> O <sub>23</sub>  | 1120.6029 | PPD           |
| 533 | pseudoginsenoside F8                                                                                                                                                                     | C <sub>55</sub> H <sub>92</sub> O <sub>23</sub>  | 1120.6029 | PPD           |
| 534 | malonylfloralginsenoside Rc <sub>1</sub>                                                                                                                                                 | C <sub>56</sub> H <sub>92</sub> O <sub>25</sub>  | 1164.5928 | PPD           |
| 535 | malonylfloralginsenoside Rc <sub>2</sub>                                                                                                                                                 | C <sub>56</sub> H <sub>92</sub> O <sub>25</sub>  | 1164.5928 | PPD           |
| 536 | malonylfloralginsenoside Rc <sub>3</sub>                                                                                                                                                 | C <sub>56</sub> H <sub>92</sub> O <sub>25</sub>  | 1164.5928 | PPD           |
| 537 | malonylfloralginsenoside Rc <sub>4</sub>                                                                                                                                                 | C <sub>56</sub> H <sub>92</sub> O <sub>25</sub>  | 1164.5928 | PPD           |
| 538 | malonylginsenoside Rb <sub>2</sub>                                                                                                                                                       | C <sub>56</sub> H <sub>92</sub> O <sub>25</sub>  | 1164.5928 | PPD           |
| 539 | malonylginsenoside Rb <sub>3</sub> *                                                                                                                                                     | C <sub>56</sub> H <sub>92</sub> O <sub>25</sub>  | 1164.5928 | PPD           |
| 540 | malonylginsenoside Rc                                                                                                                                                                    | C <sub>56</sub> H <sub>92</sub> O <sub>25</sub>  | 1164.5928 | PPD           |
| 541 | 6''-O-acetylginsenoside Rb <sub>1</sub>                                                                                                                                                  | C <sub>56</sub> H <sub>94</sub> O <sub>24</sub>  | 1150.6135 | PPD           |
| 542 | quinquenoside R1*                                                                                                                                                                        | C <sub>56</sub> H <sub>94</sub> O <sub>24</sub>  | 1150.6135 | PPD           |
| 543 | yesanchinoside F*                                                                                                                                                                        | C <sub>56</sub> H <sub>94</sub> O <sub>24</sub>  | 1150.6135 | PPT           |
| 544 | ginsenoside Ra <sub>7</sub>                                                                                                                                                              | C <sub>57</sub> H <sub>94</sub> O <sub>23</sub>  | 1146.6186 | PPD           |
| 545 | ginsenoside Ra <sub>8</sub>                                                                                                                                                              | C <sub>57</sub> H <sub>94</sub> O <sub>23</sub>  | 1146.6186 | PPD           |
| 546 | ginsenoside Ra <sub>9</sub>                                                                                                                                                              | C <sub>57</sub> H <sub>94</sub> O <sub>23</sub>  | 1146.6186 | PPD           |
| 547 | malonylfloralginsenoside Rb <sub>1</sub>                                                                                                                                                 | C <sub>57</sub> H <sub>94</sub> O <sub>26</sub>  | 1194.6033 | PPD           |
| 548 | malonylfloralginsenoside Rb <sub>2</sub>                                                                                                                                                 | C <sub>57</sub> H <sub>94</sub> O <sub>26</sub>  | 1194.6033 | PPD           |
| 549 | malonylginsenoside Rb <sub>1</sub> *                                                                                                                                                     | C <sub>57</sub> H <sub>94</sub> O <sub>26</sub>  | 1194.6033 | PPD           |
| 550 | malonylginsenoside Re <sub>8</sub>                                                                                                                                                       | C <sub>57</sub> H <sub>94</sub> O <sub>26</sub>  | 1194.6033 | PPT           |
| 551 | notoginsenoside NL-J                                                                                                                                                                     | C <sub>57</sub> H <sub>94</sub> O <sub>27</sub>  | 1210.5982 | PPD           |
| 552 | notoginsenoside Fc*                                                                                                                                                                      | C <sub>58</sub> H <sub>98</sub> O <sub>26</sub>  | 1210.6346 | PPD           |
| 553 | notoginsenosides NL-E <sub>3</sub>                                                                                                                                                       | C <sub>58</sub> H <sub>100</sub> O <sub>28</sub> | 1244.6401 | PPD           |
| 554 | notoginsenosides NL-E <sub>4</sub>                                                                                                                                                       | C <sub>58</sub> H <sub>100</sub> O <sub>28</sub> | 1244.6401 | PPD           |
| 555 | notoginsenosides NL-F <sub>2</sub>                                                                                                                                                       | C <sub>58</sub> H <sub>100</sub> O <sub>28</sub> | 1244.6401 | PPD           |
| 556 | ginsenoside IV                                                                                                                                                                           | C <sub>58</sub> H <sub>96</sub> O <sub>24</sub>  | 1210.6346 | PPD           |
| 557 | ginsenoside Ra <sub>6</sub> *                                                                                                                                                            | C <sub>58</sub> H <sub>96</sub> O <sub>24</sub>  | 1210.6346 | PPD           |
| 558 | chikusetsusaponin FH <sub>2</sub> *                                                                                                                                                      | C <sub>58</sub> H <sub>96</sub> O <sub>26</sub>  | 1208.6190 | Miscellaneous |
| 559 | chikusetsusaponin FT <sub>3</sub> *                                                                                                                                                      | C <sub>58</sub> H <sub>96</sub> O <sub>26</sub>  | 1208.6190 | Others        |
| 560 | notoginsenoside LK <sub>2</sub>                                                                                                                                                          | C <sub>58</sub> H <sub>96</sub> O <sub>26</sub>  | 1208.6190 | PPD           |
| 561 | notoginsenoside LK <sub>4</sub>                                                                                                                                                          | C <sub>58</sub> H <sub>96</sub> O <sub>27</sub>  | 1224.6139 | PPD           |
| 562 | notoginsenoside LK <sub>5</sub>                                                                                                                                                          | C <sub>58</sub> H <sub>96</sub> O <sub>27</sub>  | 1224.6139 | PPD           |
| 563 | ginsenoside Ra <sub>1</sub> *                                                                                                                                                            | C <sub>58</sub> H <sub>98</sub> O <sub>26</sub>  | 1210.6346 | PPD           |
| 564 | ginsenoside Ra <sub>2</sub> *                                                                                                                                                            | C <sub>58</sub> H <sub>98</sub> O <sub>26</sub>  | 1210.6346 | PPD           |
| 565 | notoginsenoside FP <sub>2</sub>                                                                                                                                                          | C <sub>58</sub> H <sub>98</sub> O <sub>26</sub>  | 1210.6346 | PPD           |
| 566 | notoginsenoside Fz                                                                                                                                                                       | C <sub>58</sub> H <sub>98</sub> O <sub>26</sub>  | 1210.6346 | PPD           |
| 567 | notoginsenoside NL-G <sub>2</sub>                                                                                                                                                        | C <sub>58</sub> H <sub>98</sub> O <sub>27</sub>  | 1226.6295 | PPD           |
| 568 | chikusetsusaponin LM <sub>6</sub> *                                                                                                                                                      | C <sub>58</sub> H <sub>98</sub> O <sub>27</sub>  | 1226.6295 | PPT           |
| 569 | notoginsenoside NL-B <sub>2</sub>                                                                                                                                                        | C <sub>58</sub> H <sub>98</sub> O <sub>27</sub>  | 1226.6295 | PPD           |
| 570 | notoginsenoside NL-B <sub>3</sub>                                                                                                                                                        | C <sub>58</sub> H <sub>98</sub> O <sub>27</sub>  | 1226.6295 | PPD           |
| 571 | notoginsenoside NL-H <sub>3</sub>                                                                                                                                                        | C <sub>58</sub> H <sub>98</sub> O <sub>27</sub>  | 1226.6295 | PPD           |
| 572 | notoginsenoside NL-A <sub>3</sub>                                                                                                                                                        | C <sub>58</sub> H <sub>98</sub> O <sub>28</sub>  | 1242.6245 | PPD           |
| 573 | chikusetsusaponin VI*                                                                                                                                                                    | C <sub>59</sub> H <sub>100</sub> O <sub>27</sub> | 1240.6452 | PPD           |
| 574 | baisanqisaponin A*                                                                                                                                                                       | C <sub>59</sub> H <sub>90</sub> O <sub>16</sub>  | 1054.6229 | OA            |
| 575 | baisanqisaponin C*                                                                                                                                                                       | C <sub>59</sub> H <sub>90</sub> O <sub>16</sub>  | 1054.6229 | OA            |
| 576 | yesanchinoside I*                                                                                                                                                                        | C <sub>59</sub> H <sub>100</sub> O <sub>26</sub> | 1224.6503 | DD- II        |
| 577 | ginsenoside Ra <sub>3</sub>                                                                                                                                                              | C <sub>59</sub> H <sub>100</sub> O <sub>27</sub> | 1240.6452 | PPD           |
| 578 | notoginsenoside Fa*                                                                                                                                                                      | C <sub>59</sub> H <sub>100</sub> O <sub>27</sub> | 1240.6452 | PPD           |
| 579 | notoginsenoside R4*                                                                                                                                                                      | C <sub>59</sub> H <sub>100</sub> O <sub>27</sub> | 1240.6452 | PPD           |

|     |                                                                        |                                                  |           |               |
|-----|------------------------------------------------------------------------|--------------------------------------------------|-----------|---------------|
| 580 | quinquenoside Jb                                                       | C <sub>59</sub> H <sub>100</sub> O <sub>27</sub> | 1240.6452 | PPD           |
| 581 | chikusetsusaponin FT <sub>2</sub> *                                    | C <sub>59</sub> H <sub>98</sub> O <sub>27</sub>  | 1238.6295 | Miscellaneous |
| 582 | notoginsenoside LK <sub>3</sub>                                        | C <sub>59</sub> H <sub>98</sub> O <sub>27</sub>  | 1238.6295 | PPD           |
| 583 | ginsenoside Ra <sub>5</sub>                                            | C <sub>60</sub> H <sub>100</sub> O <sub>27</sub> | 1252.6452 | PPD           |
| 584 | ginsenoside Ra <sub>0</sub>                                            | C <sub>60</sub> H <sub>102</sub> O <sub>28</sub> | 1270.6558 | PPD           |
| 585 | ginsenoside Rb <sub>6</sub>                                            | C <sub>60</sub> H <sub>102</sub> O <sub>28</sub> | 1270.6558 | PPD           |
| 586 | quinquenoside V                                                        | C <sub>60</sub> H <sub>102</sub> O <sub>28</sub> | 1270.6558 | PPD           |
| 587 | ginsenoside Rb <sub>5</sub>                                            | C <sub>60</sub> H <sub>102</sub> O <sub>28</sub> | 1270.6558 | PPD           |
| 588 | yesaninoside J*                                                        | C <sub>61</sub> H <sub>102</sub> O <sub>28</sub> | 1282.6558 | PPD           |
| 589 | malonylginsenoside Ra <sub>1</sub> *                                   | C <sub>61</sub> H <sub>100</sub> O <sub>29</sub> | 1296.6350 | PPD           |
| 590 | malonylginsenoside Ra <sub>2</sub> *                                   | C <sub>61</sub> H <sub>100</sub> O <sub>29</sub> | 1296.6350 | PPD           |
| 591 | malonylginsenoside Ra <sub>6</sub>                                     | C <sub>61</sub> H <sub>98</sub> O <sub>27</sub>  | 1262.6295 | PPD           |
| 592 | malonylnotoginsenoside R <sub>4</sub>                                  | C <sub>62</sub> H <sub>101</sub> O <sub>30</sub> | 1325.6378 | PPD           |
| 593 | ginsenoside Ra <sub>4</sub>                                            | C <sub>62</sub> H <sub>102</sub> O <sub>27</sub> | 1278.6608 | PPD           |
| 594 | malonylginsenoside Ra <sub>3</sub> *                                   | C <sub>62</sub> H <sub>102</sub> O <sub>30</sub> | 1326.6456 | PPD           |
| 595 | quinquenoside II                                                       | C <sub>62</sub> H <sub>104</sub> O <sub>24</sub> | 1232.6918 | PPD           |
| 596 | notoginsenoside Q*                                                     | C <sub>63</sub> H <sub>106</sub> O <sub>30</sub> | 1342.6769 | PPD           |
| 597 | notoginsenoside S                                                      | C <sub>63</sub> H <sub>106</sub> O <sub>30</sub> | 1342.6769 | PPD           |
| 598 | notoginsenoside D                                                      | C <sub>64</sub> H <sub>108</sub> O <sub>31</sub> | 1372.6875 | PPD           |
| 599 | notoginsenoside T                                                      | C <sub>64</sub> H <sub>108</sub> O <sub>31</sub> | 1372.6875 | PPD           |
| 600 | baisanqisaponin B*                                                     | C <sub>64</sub> H <sub>98</sub> O <sub>20</sub>  | 1186.6651 | OA            |
| 601 | polyacetyleneginsenoside Ro*                                           | C <sub>65</sub> H <sub>100</sub> O <sub>21</sub> | 1216.6757 | OA            |
| 602 | (cis)-7β,11α,19,21-tetra-O-decanoyl-18,22β-dihydroxy-dammar-1-en-3-one | C <sub>70</sub> H <sub>122</sub> O <sub>11</sub> | 1138.8987 | Others        |
| 603 | chikusetsusaponin FK <sub>4</sub> *                                    | C <sub>58</sub> H <sub>98</sub> O <sub>26</sub>  | 1210.6346 | PPD           |
| 604 | chikusetsusaponin LT <sub>8</sub> *                                    | C <sub>42</sub> H <sub>70</sub> O <sub>13</sub>  | 782.4816  | Miscellaneous |
| 605 | chikusetsusaponin LT <sub>5</sub> *                                    | C <sub>48</sub> H <sub>80</sub> O <sub>18</sub>  | 944.5345  | Miscellaneous |
| 606 | chikusetsusaponin LN <sub>4</sub> *                                    | C <sub>52</sub> H <sub>86</sub> O <sub>21</sub>  | 1046.5662 | Miscellaneous |
| 607 | chikusetsusaponin FK <sub>5</sub> *                                    | C <sub>58</sub> H <sub>98</sub> O <sub>26</sub>  | 1210.6346 | PPD           |
| 608 | gypenoside LVI*                                                        | C <sub>53</sub> H <sub>90</sub> O <sub>23</sub>  | 1094.5873 | PPD           |
| 609 | gypenoside LXVII*                                                      | C <sub>53</sub> H <sub>90</sub> O <sub>23</sub>  | 1094.5873 | PPD           |
| 610 | gypenoside XVII*                                                       | C <sub>48</sub> H <sub>82</sub> O <sub>18</sub>  | 946.5501  | PPD           |
| 611 | chikusetsusaponin L9 <sub>bc</sub> *                                   | C <sub>36</sub> H <sub>62</sub> O <sub>10</sub>  | 654.4343  | PPT           |
| 612 | ginsenoside F6*                                                        | C <sub>47</sub> H <sub>80</sub> O <sub>18</sub>  | 932.5345  | PPT           |

\* The compound reported in *Panacis Japonici*.

Table S7. 228 predicted saponin metabolites of *Panacis Japonici*.

| No. | Compound                                                                                  | Modified groups | Molecular formula                                | Exact mass |
|-----|-------------------------------------------------------------------------------------------|-----------------|--------------------------------------------------|------------|
| 1   | ginsenoside Rh1                                                                           | Mal             | C <sub>39</sub> H <sub>64</sub> O <sub>12</sub>  | 724.4398   |
| 2   | 20-glc-ginsenoside-Rf                                                                     | Mal             | C <sub>45</sub> H <sub>74</sub> O <sub>17</sub>  | 886.4926   |
| 3   | 6-O-[β-D-glucopyranosyl-(1→2)-β-D-                                                        | Ac              | C <sub>56</sub> H <sub>94</sub> O <sub>25</sub>  | 1166.6084  |
| 4   | glucopyranosyl]-20-O-[β-D-glucopyranosyl-(1→4)-β-D-glucopyranosyl]-20(s)-protopanaxatriol | Mal             | C <sub>57</sub> H <sub>94</sub> O <sub>27</sub>  | 1210.5982  |
| 5   |                                                                                           | Me              | C <sub>60</sub> H <sub>92</sub> O <sub>16</sub>  | 1068.6385  |
| 6   | baisanqisaponin A                                                                         | Et              | C <sub>61</sub> H <sub>94</sub> O <sub>16</sub>  | 1082.6542  |
| 7   |                                                                                           | Bu              | C <sub>63</sub> H <sub>98</sub> O <sub>16</sub>  | 1110.6855  |
| 8   |                                                                                           | Me              | C <sub>65</sub> H <sub>100</sub> O <sub>20</sub> | 1200.6808  |
| 9   | baisanqisaponin B                                                                         | Et              | C <sub>66</sub> H <sub>102</sub> O <sub>20</sub> | 1214.6964  |
| 10  |                                                                                           | Bu              | C <sub>68</sub> H <sub>106</sub> O <sub>20</sub> | 1242.7277  |
| 11  |                                                                                           | Me              | C <sub>60</sub> H <sub>92</sub> O <sub>16</sub>  | 1068.6385  |
| 12  | baisanqisaponin C                                                                         | Et              | C <sub>61</sub> H <sub>94</sub> O <sub>16</sub>  | 1082.6542  |
| 13  |                                                                                           | Bu              | C <sub>63</sub> H <sub>98</sub> O <sub>16</sub>  | 1110.6855  |
| 14  |                                                                                           | Ac              | C <sub>43</sub> H <sub>70</sub> O <sub>14</sub>  | 810.4766   |
| 15  | chikusetsusaponin FH1                                                                     | Mal             | C <sub>44</sub> H <sub>70</sub> O <sub>16</sub>  | 854.4664   |
| 16  |                                                                                           | Ac              | C <sub>60</sub> H <sub>98</sub> O <sub>27</sub>  | 1250.6295  |
| 17  | chikusetsusaponin FH2                                                                     | Mal             | C <sub>61</sub> H <sub>98</sub> O <sub>29</sub>  | 1294.6194  |
| 18  |                                                                                           | Ac              | C <sub>50</sub> H <sub>84</sub> O <sub>19</sub>  | 988.5607   |
| 19  | chikusetsusaponin FK1                                                                     | Mal             | C <sub>51</sub> H <sub>84</sub> O <sub>21</sub>  | 1032.5505  |
| 20  |                                                                                           | Ac              | C <sub>50</sub> H <sub>82</sub> O <sub>19</sub>  | 986.5450   |
| 21  | chikusetsusaponin FK2                                                                     | Mal             | C <sub>51</sub> H <sub>82</sub> O <sub>21</sub>  | 1030.5349  |
| 22  |                                                                                           | Ac              | C <sub>55</sub> H <sub>90</sub> O <sub>23</sub>  | 1118.5873  |
| 23  | chikusetsusaponin FK3                                                                     | Mal             | C <sub>56</sub> H <sub>90</sub> O <sub>25</sub>  | 1162.5771  |
| 24  |                                                                                           | Ac              | C <sub>60</sub> H <sub>100</sub> O <sub>27</sub> | 1252.6452  |
| 25  | chikusetsusaponin FK4                                                                     | Mal             | C <sub>61</sub> H <sub>100</sub> O <sub>29</sub> | 1296.6350  |
| 26  |                                                                                           | Ac              | C <sub>60</sub> H <sub>100</sub> O <sub>27</sub> | 1252.6452  |
| 27  | chikusetsusaponin FK5                                                                     | Mal             | C <sub>61</sub> H <sub>100</sub> O <sub>29</sub> | 1296.6350  |
| 28  |                                                                                           | Ac              | C <sub>55</sub> H <sub>90</sub> O <sub>23</sub>  | 1118.5873  |
| 29  | chikusetsusaponin FK6                                                                     | Mal             | C <sub>56</sub> H <sub>90</sub> O <sub>25</sub>  | 1162.5771  |
| 30  |                                                                                           | Ac              | C <sub>50</sub> H <sub>84</sub> O <sub>19</sub>  | 988.5607   |
| 31  | chikusetsusaponin FK7                                                                     | Mal             | C <sub>51</sub> H <sub>84</sub> O <sub>21</sub>  | 1032.5505  |
| 32  |                                                                                           | Ac              | C <sub>55</sub> H <sub>94</sub> O <sub>25</sub>  | 1154.6084  |
| 33  | chikusetsusaponin FM1                                                                     | Mal             | C <sub>56</sub> H <sub>94</sub> O <sub>27</sub>  | 1198.5982  |
| 34  |                                                                                           | Ac              | C <sub>43</sub> H <sub>70</sub> O <sub>14</sub>  | 810.4766   |
| 35  | chikusetsusaponin FT1                                                                     | Mal             | C <sub>44</sub> H <sub>70</sub> O <sub>16</sub>  | 854.4664   |
| 36  |                                                                                           | Ac              | C <sub>61</sub> H <sub>100</sub> O <sub>28</sub> | 1280.6401  |
| 37  | chikusetsusaponin FT2                                                                     | Mal             | C <sub>62</sub> H <sub>100</sub> O <sub>30</sub> | 1324.6299  |
| 38  |                                                                                           | Ac              | C <sub>60</sub> H <sub>98</sub> O <sub>27</sub>  | 1250.6295  |
| 39  | chikusetsusaponin FT3                                                                     | Mal             | C <sub>61</sub> H <sub>96</sub> O <sub>29</sub>  | 1292.6037  |
| 40  |                                                                                           | Ac              | C <sub>49</sub> H <sub>80</sub> O <sub>18</sub>  | 956.5345   |
| 41  | chikusetsusaponin FT4                                                                     | Mal             | C <sub>50</sub> H <sub>80</sub> O <sub>20</sub>  | 1000.5243  |
| 42  |                                                                                           | Ac              | C <sub>43</sub> H <sub>72</sub> O <sub>13</sub>  | 796.4973   |
| 43  | chikusetsusaponin Ia                                                                      | Mal             | C <sub>44</sub> H <sub>72</sub> O <sub>15</sub>  | 840.4871   |
| 44  |                                                                                           | Mt              | C <sub>48</sub> H <sub>76</sub> O <sub>18</sub>  | 940.5032   |
| 45  | chikusetsusaponin Ib                                                                      | Et              | C <sub>49</sub> H <sub>78</sub> O <sub>18</sub>  | 954.5188   |
| 46  |                                                                                           | Bu              | C <sub>51</sub> H <sub>82</sub> O <sub>18</sub>  | 982.5501   |
| 47  |                                                                                           | Mt              | C <sub>43</sub> H <sub>68</sub> O <sub>14</sub>  | 808.4609   |
| 48  | chikusetsusaponin II                                                                      | Et              | C <sub>44</sub> H <sub>70</sub> O <sub>14</sub>  | 822.4766   |

|    |                                    |     |                                                  |           |
|----|------------------------------------|-----|--------------------------------------------------|-----------|
| 49 |                                    | Bu  | C <sub>46</sub> H <sub>74</sub> O <sub>14</sub>  | 850.5079  |
| 50 |                                    | Ac  | C <sub>49</sub> H <sub>82</sub> O <sub>18</sub>  | 958.5501  |
| 51 | chikusetsusaponin III              | Mal | C <sub>50</sub> H <sub>82</sub> O <sub>20</sub>  | 1002.5399 |
| 52 |                                    | Ac  | C <sub>38</sub> H <sub>64</sub> O <sub>10</sub>  | 680.4499  |
| 53 | chikusetsusaponin L10              | Mal | C <sub>39</sub> H <sub>64</sub> O <sub>12</sub>  | 724.4398  |
| 54 |                                    | Ac  | C <sub>48</sub> H <sub>80</sub> O <sub>18</sub>  | 944.5345  |
| 55 | chikusetsusaponin L <sub>5</sub>   | Mal | C <sub>49</sub> H <sub>80</sub> O <sub>20</sub>  | 988.5243  |
| 56 |                                    | Ac  | C <sub>38</sub> H <sub>64</sub> O <sub>11</sub>  | 696.4449  |
| 57 | chikusetsusaponin L9 <sub>a</sub>  | Mal | C <sub>39</sub> H <sub>64</sub> O <sub>13</sub>  | 740.4347  |
| 58 |                                    | Ac  | C <sub>38</sub> H <sub>64</sub> O <sub>11</sub>  | 696.4449  |
| 59 | chikusetsusaponin L9 <sub>bc</sub> | Mal | C <sub>39</sub> H <sub>64</sub> O <sub>13</sub>  | 740.4347  |
| 60 |                                    | Ac  | C <sub>43</sub> H <sub>72</sub> O <sub>14</sub>  | 812.4922  |
| 61 | chikusetsusaponin LM1              | Mal | C <sub>44</sub> H <sub>72</sub> O <sub>16</sub>  | 856.4820  |
| 62 |                                    | Ac  | C <sub>48</sub> H <sub>80</sub> O <sub>18</sub>  | 944.5345  |
| 63 | chikusetsusaponin LM2              | Mal | C <sub>49</sub> H <sub>80</sub> O <sub>20</sub>  | 988.5243  |
| 64 |                                    | Ac  | C <sub>48</sub> H <sub>80</sub> O <sub>18</sub>  | 944.5345  |
| 65 | chikusetsusaponin LM3              | Mal | C <sub>49</sub> H <sub>80</sub> O <sub>20</sub>  | 988.5243  |
| 66 |                                    | Ac  | C <sub>50</sub> H <sub>84</sub> O <sub>20</sub>  | 1004.5556 |
| 67 | chikusetsusaponin LM4              | Mal | C <sub>51</sub> H <sub>84</sub> O <sub>22</sub>  | 1048.5454 |
| 68 |                                    | Ac  | C <sub>55</sub> H <sub>92</sub> O <sub>24</sub>  | 1136.5979 |
| 69 | chikusetsusaponin LM5              | Mal | C <sub>56</sub> H <sub>92</sub> O <sub>26</sub>  | 1180.5877 |
| 70 |                                    | Ac  | C <sub>60</sub> H <sub>100</sub> O <sub>28</sub> | 1268.6401 |
| 71 | chikusetsusaponin LM6              | Mal | C <sub>61</sub> H <sub>100</sub> O <sub>30</sub> | 1312.6299 |
| 72 |                                    | Ac  | C <sub>54</sub> H <sub>88</sub> O <sub>22</sub>  | 1088.5767 |
| 73 | chikusetsusaponin LN4              | Mal | C <sub>55</sub> H <sub>88</sub> O <sub>24</sub>  | 1132.5666 |
| 74 |                                    | Ac  | C <sub>50</sub> H <sub>82</sub> O <sub>19</sub>  | 986.5450  |
| 75 | chikusetsusaponin LT5              | Mal | C <sub>51</sub> H <sub>82</sub> O <sub>21</sub>  | 1030.5349 |
| 76 |                                    | Ac  | C <sub>44</sub> H <sub>72</sub> O <sub>14</sub>  | 824.4922  |
| 77 | chikusetsusaponin LT8              | Mal | C <sub>45</sub> H <sub>72</sub> O <sub>16</sub>  | 868.4820  |
| 78 |                                    | Ac  | C <sub>61</sub> H <sub>102</sub> O <sub>28</sub> | 1282.6558 |
| 79 | chikusetsusaponin VI               | Mal | C <sub>62</sub> H <sub>102</sub> O <sub>30</sub> | 1326.6456 |
| 80 |                                    | Ac  | C <sub>55</sub> H <sub>92</sub> O <sub>23</sub>  | 1120.6029 |
| 81 | chikusetsusaponin VII              | Mal | C <sub>56</sub> H <sub>92</sub> O <sub>25</sub>  | 1164.5928 |
| 82 |                                    | Ac  | C <sub>38</sub> H <sub>64</sub> O <sub>9</sub>   | 664.4550  |
| 83 | ginsenoside K                      | Mal | C <sub>39</sub> H <sub>64</sub> O <sub>11</sub>  | 708.4449  |
| 84 |                                    | Ac  | C <sub>56</sub> H <sub>94</sub> O <sub>24</sub>  | 1150.6135 |
| 85 | ginsenoside B1                     | Mal | C <sub>57</sub> H <sub>94</sub> O <sub>26</sub>  | 1194.6033 |
| 86 |                                    | Ac  | C <sub>44</sub> H <sub>74</sub> O <sub>14</sub>  | 826.5079  |
| 87 | ginsenoside F2                     | Mal | C <sub>45</sub> H <sub>74</sub> O <sub>16</sub>  | 870.4977  |
| 88 |                                    | Ac  | C <sub>43</sub> H <sub>72</sub> O <sub>14</sub>  | 812.4922  |
| 89 | ginsenoside F3                     | Mal | C <sub>44</sub> H <sub>72</sub> O <sub>16</sub>  | 856.4820  |
| 90 |                                    | Ac  | C <sub>44</sub> H <sub>72</sub> O <sub>13</sub>  | 808.4973  |
| 91 | ginsenoside F4                     | Mal | C <sub>45</sub> H <sub>72</sub> O <sub>15</sub>  | 852.4871  |
| 92 |                                    | Ac  | C <sub>43</sub> H <sub>72</sub> O <sub>14</sub>  | 812.4922  |
| 93 | ginsenoside F5                     | Mal | C <sub>44</sub> H <sub>72</sub> O <sub>16</sub>  | 856.4820  |
| 94 |                                    | Ac  | C <sub>49</sub> H <sub>82</sub> O <sub>19</sub>  | 974.5450  |
| 95 | ginsenoside F6                     | Mal | C <sub>50</sub> H <sub>82</sub> O <sub>21</sub>  | 1018.5349 |
| 96 |                                    | Ac  | C <sub>50</sub> H <sub>82</sub> O <sub>20</sub>  | 1002.5399 |
| 97 | ginsenoside III                    | Mal | C <sub>51</sub> H <sub>82</sub> O <sub>22</sub>  | 1046.5298 |
| 98 | ginsenoside Ra6                    | Ac  | C <sub>60</sub> H <sub>98</sub> O <sub>25</sub>  | 1218.6397 |

|     |                                        |     |                                                  |           |
|-----|----------------------------------------|-----|--------------------------------------------------|-----------|
| 99  | ginsenoside Rb2                        | Ac  | C <sub>55</sub> H <sub>92</sub> O <sub>23</sub>  | 1120.6029 |
| 100 | ginsenoside Rc                         | Ac  | C <sub>55</sub> H <sub>92</sub> O <sub>24</sub>  | 1136.5979 |
| 101 | ginsenoside Re2                        | Ac  | C <sub>50</sub> H <sub>84</sub> O <sub>20</sub>  | 1004.5556 |
| 102 | ginsenoside Re3                        | Ac  | C <sub>50</sub> H <sub>84</sub> O <sub>20</sub>  | 1004.5556 |
| 103 | ginsenoside Re4                        | Ac  | C <sub>49</sub> H <sub>82</sub> O <sub>19</sub>  | 974.5450  |
| 104 | ginsenoside Re8                        | Ac  | C <sub>56</sub> H <sub>94</sub> O <sub>24</sub>  | 1150.6135 |
| 105 | ginsenoside Rg2                        | Ac  | C <sub>44</sub> H <sub>74</sub> O <sub>14</sub>  | 826.5079  |
| 106 | ginsenoside Rg5                        | Ac  | C <sub>44</sub> H <sub>72</sub> O <sub>13</sub>  | 808.4973  |
| 107 | ginsenoside Rg6                        | Ac  | C <sub>44</sub> H <sub>72</sub> O <sub>13</sub>  | 808.4973  |
| 108 |                                        | Ac  | C <sub>44</sub> H <sub>72</sub> O <sub>14</sub>  | 824.4922  |
| 109 | ginsenoside Rg9                        | Mal | C <sub>45</sub> H <sub>72</sub> O <sub>16</sub>  | 868.4820  |
| 110 |                                        | Ac  | C <sub>38</sub> H <sub>64</sub> O <sub>9</sub>   | 664.4550  |
| 111 | ginsenoside Rh2                        | Mal | C <sub>39</sub> H <sub>64</sub> O <sub>11</sub>  | 708.4449  |
| 112 |                                        | Ac  | C <sub>38</sub> H <sub>62</sub> O <sub>9</sub>   | 662.4394  |
| 113 | ginsenoside Rh4                        | Mal | C <sub>39</sub> H <sub>62</sub> O <sub>11</sub>  | 706.4292  |
| 114 | ginsenoside Rk1                        | Ac  | C <sub>44</sub> H <sub>72</sub> O <sub>13</sub>  | 808.4973  |
| 115 | ginsenoside Rk2                        | Ac  | C <sub>38</sub> H <sub>62</sub> O <sub>8</sub>   | 646.4445  |
| 116 | ginsenoside Rk3                        | Ac  | C <sub>38</sub> H <sub>62</sub> O <sub>9</sub>   | 662.4394  |
| 117 | ginsenoside Rs1                        | Mal | C <sub>58</sub> H <sub>94</sub> O <sub>26</sub>  | 1206.6033 |
| 118 | ginsenoside Rs2                        | Mal | C <sub>58</sub> H <sub>94</sub> O <sub>26</sub>  | 1206.6033 |
| 119 | ginsenoside Rs3                        | Mal | C <sub>47</sub> H <sub>76</sub> O <sub>17</sub>  | 912.5083  |
| 120 | ginsenoside Rs5                        | Mal | C <sub>47</sub> H <sub>74</sub> O <sub>16</sub>  | 894.4977  |
| 121 |                                        | Ac  | C <sub>55</sub> H <sub>92</sub> O <sub>24</sub>  | 1136.5979 |
| 122 | gypenoside LVI                         | Mal | C <sub>56</sub> H <sub>92</sub> O <sub>26</sub>  | 1180.5877 |
| 123 |                                        | Ac  | C <sub>55</sub> H <sub>92</sub> O <sub>24</sub>  | 1136.5979 |
| 124 | gypenoside LXVII                       | Mal | C <sub>56</sub> H <sub>92</sub> O <sub>26</sub>  | 1180.5877 |
| 125 |                                        | Ac  | C <sub>50</sub> H <sub>94</sub> O <sub>19</sub>  | 998.6389  |
| 126 | gypenoside XVII                        | Mal | C <sub>51</sub> H <sub>84</sub> O <sub>21</sub>  | 1032.5505 |
| 127 |                                        | Me  | C <sub>49</sub> H <sub>78</sub> O <sub>19</sub>  | 970.5137  |
| 128 | hemsgiganoside B                       | Et  | C <sub>50</sub> H <sub>80</sub> O <sub>19</sub>  | 984.5294  |
| 129 |                                        | Bu  | C <sub>52</sub> H <sub>84</sub> O <sub>19</sub>  | 1012.5607 |
| 130 |                                        | Ac  | C <sub>44</sub> H <sub>74</sub> O <sub>15</sub>  | 842.5028  |
| 131 | majoroside F2                          | Mal | C <sub>45</sub> H <sub>74</sub> O <sub>17</sub>  | 886.4926  |
| 132 |                                        | Ac  | C <sub>44</sub> H <sub>74</sub> O <sub>15</sub>  | 842.5028  |
| 133 | majoroside F3                          | Mal | C <sub>45</sub> H <sub>74</sub> O <sub>17</sub>  | 886.4926  |
| 134 |                                        | Ac  | C <sub>44</sub> H <sub>74</sub> O <sub>15</sub>  | 842.5028  |
| 135 | majoroside F4                          | Mal | C <sub>45</sub> H <sub>74</sub> O <sub>17</sub>  | 886.4926  |
| 136 |                                        | Me  | C <sub>37</sub> H <sub>60</sub> O <sub>9</sub>   | 648.4237  |
| 137 | maslinic Acid 28-O-β-d-glucopyranoside | Et  | C <sub>38</sub> H <sub>62</sub> O <sub>9</sub>   | 662.4394  |
| 138 |                                        | Bu  | C <sub>40</sub> H <sub>66</sub> O <sub>9</sub>   | 690.4707  |
| 139 | notoginsenoside B                      | Ac  | C <sub>56</sub> H <sub>92</sub> O <sub>25</sub>  | 1164.5928 |
| 140 |                                        | Ac  | C <sub>61</sub> H <sub>102</sub> O <sub>28</sub> | 1282.6558 |
| 141 | notoginsenoside Fa                     | Mal | C <sub>59</sub> H <sub>100</sub> O <sub>30</sub> | 1288.6299 |
| 142 |                                        | Ac  | C <sub>60</sub> H <sub>100</sub> O <sub>27</sub> | 1252.6452 |
| 143 | notoginsenoside Fc                     | Mal | C <sub>61</sub> H <sub>100</sub> O <sub>29</sub> | 1296.6350 |
| 144 |                                        | Ac  | C <sub>49</sub> H <sub>82</sub> O <sub>18</sub>  | 958.5501  |
| 145 | notoginsenoside Fe                     | Mal | C <sub>50</sub> H <sub>82</sub> O <sub>20</sub>  | 1002.5399 |
| 146 |                                        | Ac  | C <sub>49</sub> H <sub>82</sub> O <sub>19</sub>  | 974.5450  |
| 147 | notoginsenoside Fp1                    | Mal | C <sub>50</sub> H <sub>82</sub> O <sub>21</sub>  | 1018.5349 |
| 148 |                                        | Ac  | C <sub>50</sub> H <sub>82</sub> O <sub>20</sub>  | 1002.5399 |
| 149 | notoginsenoside G                      | Mal | C <sub>51</sub> H <sub>82</sub> O <sub>22</sub>  | 1046.5298 |

|     |                                       |     |                                                  |           |
|-----|---------------------------------------|-----|--------------------------------------------------|-----------|
| 150 |                                       | Ac  | C <sub>44</sub> H <sub>76</sub> O <sub>17</sub>  | 876.5083  |
| 151 | notoginsenoside J                     | Mal | C <sub>45</sub> H <sub>76</sub> O <sub>19</sub>  | 920.4981  |
| 152 |                                       | Ac  | C <sub>50</sub> H <sub>84</sub> O <sub>19</sub>  | 988.5607  |
| 153 | notoginsenoside K                     | Mal | C <sub>51</sub> H <sub>84</sub> O <sub>21</sub>  | 1032.5505 |
| 154 |                                       | Ac  | C <sub>50</sub> H <sub>84</sub> O <sub>20</sub>  | 1004.5556 |
| 155 | notoginsenoside M                     | Mal | C <sub>51</sub> H <sub>84</sub> O <sub>22</sub>  | 1048.5454 |
| 156 |                                       | Ac  | C <sub>50</sub> H <sub>84</sub> O <sub>20</sub>  | 1004.5556 |
| 157 | notoginsenoside N                     | Mal | C <sub>51</sub> H <sub>84</sub> O <sub>22</sub>  | 1048.5454 |
| 158 |                                       | Ac  | C <sub>65</sub> H <sub>108</sub> O <sub>31</sub> | 1384.6875 |
| 159 | notoginsenoside Q                     | Mal | C <sub>66</sub> H <sub>108</sub> O <sub>33</sub> | 1428.6773 |
| 160 |                                       | Ac  | C <sub>49</sub> H <sub>82</sub> O <sub>19</sub>  | 974.5450  |
| 161 | notoginsenoside R1                    | Mal | C <sub>50</sub> H <sub>82</sub> O <sub>21</sub>  | 1018.5349 |
| 162 |                                       | Ac  | C <sub>43</sub> H <sub>72</sub> O <sub>14</sub>  | 812.4922  |
| 163 | notoginsenoside R2                    | Mal | C <sub>44</sub> H <sub>72</sub> O <sub>16</sub>  | 856.4820  |
| 164 |                                       | Ac  | C <sub>50</sub> H <sub>84</sub> O <sub>20</sub>  | 1004.5556 |
| 165 | notoginsenoside R3                    | Mal | C <sub>51</sub> H <sub>84</sub> O <sub>22</sub>  | 1048.5454 |
| 166 | notoginsenoside R4                    | Ac  | C <sub>61</sub> H <sub>102</sub> O <sub>28</sub> | 1282.6558 |
| 167 |                                       | Ac  | C <sub>50</sub> H <sub>84</sub> O <sub>20</sub>  | 1004.5556 |
| 168 | notoginsenoside R6                    | Mal | C <sub>51</sub> H <sub>84</sub> O <sub>23</sub>  | 1064.5403 |
| 169 |                                       | Ac  | C <sub>43</sub> H <sub>70</sub> O <sub>13</sub>  | 794.4816  |
| 170 | notoginsenoside T5                    | Mal | C <sub>44</sub> H <sub>70</sub> O <sub>16</sub>  | 854.4664  |
| 171 |                                       | Mt  | C <sub>37</sub> H <sub>60</sub> O <sub>8</sub>   | 632.4288  |
| 172 | oleanolic Acid 28-O-β-D-glucopyranose | Et  | C <sub>38</sub> H <sub>62</sub> O <sub>8</sub>   | 646.4445  |
| 173 |                                       | Bu  | C <sub>40</sub> H <sub>66</sub> O <sub>8</sub>   | 674.4758  |
| 174 |                                       | Mt  | C <sub>48</sub> H <sub>76</sub> O <sub>18</sub>  | 940.5032  |
| 175 | pjs-2                                 | Et  | C <sub>49</sub> H <sub>78</sub> O <sub>18</sub>  | 954.5188  |
| 176 |                                       | Bu  | C <sub>51</sub> H <sub>82</sub> O <sub>18</sub>  | 982.5501  |
| 177 |                                       | Mt  | C <sub>42</sub> H <sub>68</sub> O <sub>12</sub>  | 764.4711  |
| 178 | pjs-4                                 | Et  | C <sub>43</sub> H <sub>70</sub> O <sub>12</sub>  | 778.4867  |
| 179 |                                       | Bu  | C <sub>45</sub> H <sub>74</sub> O <sub>12</sub>  | 806.5180  |
| 180 |                                       | Ac  | C <sub>38</sub> H <sub>60</sub> O <sub>9</sub>   | 660.4237  |
| 181 | prosaikogenin H                       | Mal | C <sub>39</sub> H <sub>60</sub> O <sub>11</sub>  | 704.4136  |
| 182 |                                       | Mt  | C <sub>42</sub> H <sub>66</sub> O <sub>13</sub>  | 778.4503  |
| 183 | pseudoginsenoside Rp1                 | Et  | C <sub>43</sub> H <sub>68</sub> O <sub>13</sub>  | 792.4660  |
| 184 |                                       | Bu  | C <sub>45</sub> H <sub>72</sub> O <sub>13</sub>  | 820.4973  |
| 185 |                                       | Ac  | C <sub>52</sub> H <sub>86</sub> O <sub>20</sub>  | 1030.5712 |
| 186 | pseudoginsenoside Rs1                 | Mal | C <sub>53</sub> H <sub>86</sub> O <sub>22</sub>  | 1074.5611 |
| 187 |                                       | Ac  | C <sub>50</sub> H <sub>82</sub> O <sub>19</sub>  | 986.5450  |
| 188 | quinquenoside L1                      | Mal | C <sub>51</sub> H <sub>82</sub> O <sub>21</sub>  | 1030.5349 |
| 189 |                                       | Ac  | C <sub>49</sub> H <sub>82</sub> O <sub>19</sub>  | 974.5450  |
| 190 | quinquenoside L17                     | Mal | C <sub>50</sub> H <sub>82</sub> O <sub>21</sub>  | 1018.5349 |
| 191 |                                       | Ac  | C <sub>58</sub> H <sub>96</sub> O <sub>25</sub>  | 1192.6241 |
| 192 | quinquenoside R1                      | Mal | C <sub>59</sub> H <sub>96</sub> O <sub>27</sub>  | 1236.6139 |
| 193 |                                       | Ac  | C <sub>43</sub> H <sub>72</sub> O <sub>14</sub>  | 812.4922  |
| 194 | sanchirrhinoside A3                   | Mal | C <sub>44</sub> H <sub>72</sub> O <sub>16</sub>  | 856.4820  |
| 195 |                                       | Ac  | C <sub>43</sub> H <sub>72</sub> O <sub>14</sub>  | 812.4922  |
| 196 | sanchirrhinoside A4                   | Mal | C <sub>44</sub> H <sub>72</sub> O <sub>16</sub>  | 856.4820  |
| 197 |                                       | Me  | C <sub>48</sub> H <sub>76</sub> O <sub>18</sub>  | 940.5032  |
| 198 | stipuleanoside R1                     | Et  | C <sub>49</sub> H <sub>78</sub> O <sub>18</sub>  | 954.5188  |
| 199 |                                       | Bu  | C <sub>51</sub> H <sub>82</sub> O <sub>18</sub>  | 982.5501  |
| 200 | stipuleanoside R2                     | Et  | C <sub>55</sub> H <sub>88</sub> O <sub>18</sub>  | 1036.5971 |

---

|     |                   |     |                                                  |           |
|-----|-------------------|-----|--------------------------------------------------|-----------|
| 201 |                   | Bu  | C <sub>57</sub> H <sub>92</sub> O <sub>23</sub>  | 1144.6029 |
| 202 |                   | Me  | C <sub>52</sub> H <sub>84</sub> O <sub>18</sub>  | 996.5658  |
| 203 | taibaienoside I   | Et  | C <sub>53</sub> H <sub>86</sub> O <sub>18</sub>  | 1010.5814 |
| 204 |                   | Bu  | C <sub>55</sub> H <sub>90</sub> O <sub>18</sub>  | 1038.6127 |
| 205 |                   | Me  | C <sub>50</sub> H <sub>80</sub> O <sub>18</sub>  | 968.5345  |
| 206 | taibaienoside II  | Et  | C <sub>51</sub> H <sub>82</sub> O <sub>18</sub>  | 982.5501  |
| 207 |                   | Bu  | C <sub>53</sub> H <sub>86</sub> O <sub>18</sub>  | 1010.5814 |
| 208 |                   | Me  | C <sub>49</sub> H <sub>78</sub> O <sub>19</sub>  | 970.5137  |
| 209 | tuberoside A      | Et  | C <sub>50</sub> H <sub>80</sub> O <sub>19</sub>  | 984.5294  |
| 210 |                   | Bu  | C <sub>52</sub> H <sub>84</sub> O <sub>19</sub>  | 1012.5607 |
| 211 | yesanchinoside D  | Ac  | C <sub>46</sub> H <sub>76</sub> O <sub>16</sub>  | 884.5133  |
| 212 |                   | Mal | C <sub>47</sub> H <sub>76</sub> O <sub>18</sub>  | 928.5032  |
| 213 | yesanchinoside E  | Ac  | C <sub>56</sub> H <sub>94</sub> O <sub>24</sub>  | 1150.6135 |
| 214 |                   | Mal | C <sub>57</sub> H <sub>94</sub> O <sub>26</sub>  | 1194.6033 |
| 215 | yesanchinoside f  | Ac  | C <sub>58</sub> H <sub>96</sub> O <sub>25</sub>  | 1192.6241 |
| 216 |                   | Mal | C <sub>59</sub> H <sub>96</sub> O <sub>27</sub>  | 1236.6139 |
| 217 | yesanchinoside G  | Ac  | C <sub>55</sub> H <sub>90</sub> O <sub>24</sub>  | 1134.5822 |
| 218 |                   | Mal | C <sub>56</sub> H <sub>90</sub> O <sub>26</sub>  | 1178.5720 |
| 219 | yesanchinoside H  | Ac  | C <sub>55</sub> H <sub>92</sub> O <sub>24</sub>  | 1136.5979 |
| 220 |                   | Mal | C <sub>56</sub> H <sub>92</sub> O <sub>26</sub>  | 1180.5877 |
| 221 | yesanchinoside J  | Ac  | C <sub>63</sub> H <sub>104</sub> O <sub>29</sub> | 1324.6663 |
| 222 |                   | Mal | C <sub>64</sub> H <sub>104</sub> O <sub>31</sub> | 1368.6562 |
| 223 | yesanchinoside R1 | Ac  | C <sub>38</sub> H <sub>64</sub> O <sub>11</sub>  | 696.4449  |
| 224 |                   | Mal | C <sub>39</sub> H <sub>64</sub> O <sub>13</sub>  | 740.4347  |
| 225 | yesanchinoside R2 | Ac  | C <sub>43</sub> H <sub>72</sub> O <sub>15</sub>  | 828.4871  |
| 226 |                   | Mal | C <sub>44</sub> H <sub>72</sub> O <sub>17</sub>  | 872.477   |
| 227 | yesanchinoside R3 | Ac  | C <sub>38</sub> H <sub>64</sub> O <sub>11</sub>  | 696.4449  |
| 228 |                   | Mal | C <sub>39</sub> H <sub>64</sub> O <sub>13</sub>  | 740.4347  |

Mal: malonyl; Ac: acetyl; Me: methyl; Et: ethyl; Bu: buthyl

**Table S8.** Detailed structural information of the 307 saponins characterized by 2D LC-MS.

| No. | t <sub>R</sub><br>(min) | Adduct                  | Observed<br>m/z | Theoretical<br>m/z | Formula                                         | Error<br>(ppm) | Identification                     | Type                 | ESI-MS <sup>2</sup>                                                  | Origin |
|-----|-------------------------|-------------------------|-----------------|--------------------|-------------------------------------------------|----------------|------------------------------------|----------------------|----------------------------------------------------------------------|--------|
| 1   | 2.87                    | [M + HCOO] <sup>-</sup> | 1025.5518       | 979.5478           | C <sub>48</sub> H <sub>84</sub> O <sub>20</sub> | 5.5            | C4-Glc-Rha-Glc                     | C4                   | 979.5596, 799.4845, 781.4490, 653.4387, 509.3967                     | F14    |
| 2   | 3.09                    | [M + HCOO] <sup>-</sup> | 1025.5588       | 979.5478           | C <sub>48</sub> H <sub>84</sub> O <sub>20</sub> | 5.5            | C3-Glc-Rha-Glc                     | C3                   | 979.5596, 799.4845, 709.9676, 653.4387, 509.3869, 491.3747           | F14    |
| 3   | 3.91                    | [M + HCOO] <sup>-</sup> | 993.5362        | 947.5216           | C <sub>47</sub> H <sub>80</sub> O <sub>19</sub> | -5.7           | D1-Glc-Rha-Glc                     | D1                   | 947.5162, 767.4493, 621.4021, 477.3530                               | F13    |
| 4   | 4.11                    | [M + HCOO] <sup>-</sup> | 879.4962        | 833.4899           | C <sub>42</sub> H <sub>74</sub> O <sub>16</sub> | 0.4            | notoginsenoside J or isomer        | C4                   | 833.4902, 671.4362, 509.3837                                         | F13    |
| 5   | 4.21                    | [M + HCOO] <sup>-</sup> | 1007.5425       | 961.5372           | C <sub>48</sub> H <sub>82</sub> O <sub>19</sub> | -0.2           | (PPT+O)-Glc-Rha-Glc                | PPT+O                | 961.5474, 799.4845, 781.4734, 653.4164, 635.4139, 565.3687, 491.3651 | F13    |
| 6   | 4.28                    | [M + HCOO] <sup>-</sup> | 1009.5534       | 963.5529           | C <sub>48</sub> H <sub>84</sub> O <sub>19</sub> | -4.9           | (PPT+H <sub>2</sub> O)-Glc-Rha-Glc | PPT+H <sub>2</sub> O | 963.5662, 801.4984, 783.5012, 655.4607, 637.4300, 493.3903, 475.3801 | F10    |
| 7   | 4.54                    | [M + HCOO] <sup>-</sup> | 879.4957        | 833.4899           | C <sub>42</sub> H <sub>74</sub> O <sub>16</sub> | -0.2           | notoginsenoside J or isomer        | C4                   | 833.4893, 671.4369, 653.4259, 509.3843, 391.2848                     | F13    |
| 8   | 4.66                    | [M + HCOO] <sup>-</sup> | 1023.5321       | 977.5321           | C <sub>48</sub> H <sub>82</sub> O <sub>20</sub> | -5.4           | yesaninoside B                     | OT                   | 977.5378, 815.4796, 653.4276, 491.3747, 415.3195                     | F14    |
| 9   | 4.97                    | [M + HCOO] <sup>-</sup> | 993.5225        | 947.5216           | C <sub>47</sub> H <sub>80</sub> O <sub>19</sub> | -4.5           | C1-Glc-Glc-Xyl                     | C1                   | 947.5162, 815.4671, 653.4276, 491.3747, 391.2049                     | F13    |
| 10  | 5.27                    | [M + HCOO] <sup>-</sup> | 849.4843        | 803.4793           | C <sub>41</sub> H <sub>72</sub> O <sub>15</sub> | -0.6           | C4-Glc-Xyl                         | C4                   | 803.4777, 671.4326, 653.4276, 509.3869, 491.1908, 391.2929           | F10    |
| 11  | 5.32                    | [M + HCOO] <sup>-</sup> | 993.5225        | 947.5216           | C <sub>47</sub> H <sub>80</sub> O <sub>19</sub> | -4.5           | C1-Glc-Glc-Xyl                     | C1                   | 947.5162, 815.4671, 653.4276, 491.3747, 391.2740                     | F13    |
| 12  | 5.35                    | [M + HCOO] <sup>-</sup> | 1007.5414       | 961.5372           | C <sub>48</sub> H <sub>82</sub> O <sub>19</sub> | -1.9           | C3-Glc-Rha-Glc                     | C3                   | 961.5339, 799.4722, 653.4387, 509.3869, 491.1908                     | F10    |
| 13  | 5.35                    | [M + HCOO] <sup>-</sup> | 993.5225        | 947.5216           | C <sub>47</sub> H <sub>80</sub> O <sub>19</sub> | -4.5           | OT-Glc-Glc-Xyl                     | OT                   | 947.5162, 815.4671, 635.4113, 491.3747, 415.9409                     | F13    |
| 14  | 5.39                    | [M + HCOO] <sup>-</sup> | 863.5040        | 817.4949           | C <sub>42</sub> H <sub>74</sub> O <sub>15</sub> | 4.2            | C4-Glc-Rha                         | C4                   | 817.4885, 671.4326, 653.4276, 509.3869, 391.2843                     | F9     |
| 15  | 5.47                    | [M + HCOO] <sup>-</sup> | 1007.5425       | 961.5372           | C <sub>48</sub> H <sub>82</sub> O <sub>19</sub> | -0.2           | OT-Glc-Glc-Rha                     | OT                   | 961.5380, 815.4795, 797.4684, 653.4269, 635.4156, 491.3732, 415.3229 | F12    |
| 16  | 5.97                    | [M + HCOO] <sup>-</sup> | 861.4862        | 815.4793           | C <sub>42</sub> H <sub>72</sub> O <sub>15</sub> | 1.0            | vinaginsenoside R15 or isomer      | C3                   | 815.4796, 653.4276, 491.3747, 391.2843                               | F10    |
| 17  | 6.13                    | [M - H] <sup>-</sup>    | 961.5474        | 961.5372           | C <sub>48</sub> H <sub>82</sub> O <sub>19</sub> | 5.2            | C1-Glc-Rha-Glc                     | C1                   | 961.5204, 799.4722, 735.0389, 653.4164, 491.3651, 391.2843           | F8     |
| 18  | 6.25                    | [M + HCOO] <sup>-</sup> | 861.4839        | 815.4793           | C <sub>42</sub> H <sub>72</sub> O <sub>15</sub> | -1.7           | vinaginsenoside R15 or isomer      | C3                   | 815.4796, 653.4276, 491.3747, 391.2843                               | F10    |
| 19  | 6.32                    | [M + HCOO] <sup>-</sup> | 831.4694        | 785.4687           | C <sub>41</sub> H <sub>70</sub> O <sub>14</sub> | -5.8           | yesaninoside R2                    | C1                   | 785.4704, 553.3367, 491.3651, 391.2843                               | F9     |



|     |      |                         |           |           |                                                 |      |                                        |                      |                                                                       |     |
|-----|------|-------------------------|-----------|-----------|-------------------------------------------------|------|----------------------------------------|----------------------|-----------------------------------------------------------------------|-----|
| 20  | 6.38 | [M + HCOO] <sup>-</sup> | 1153.5614 | 1107.5587 | C <sub>53</sub> H <sub>88</sub> O <sub>24</sub> | 2.5  | (PPT+H <sub>2</sub> O)-Glc-Glc-Rha-Rha | PPT+H <sub>2</sub> O | 1107.5470, 961.5204, 817.5010, 655.4607, 493.4903                     | F14 |
| 21  | 6.65 | [M + HCOO] <sup>-</sup> | 831.4694  | 785.4687  | C <sub>41</sub> H <sub>70</sub> O <sub>14</sub> | -5.8 | notoginsenoside Rw2 or isomer          | C3                   | 785.4704, 653.4276, 491.3742, 403.3220, 391.2843                      | F8  |
| 22  | 6.80 | [M + HCOO] <sup>-</sup> | 831.4743  | 785.4687  | C <sub>41</sub> H <sub>70</sub> O <sub>14</sub> | -0.6 | notoginsenoside Rw2 or isomer          | C3                   | 785.4704, 653.4276, 491.3747, 391.2843                                | F8  |
| 23  | 7.11 | [M + HCOO] <sup>-</sup> | 847.5053  | 801.5000  | C <sub>42</sub> H <sub>74</sub> O <sub>14</sub> | -0.7 | ginsenoside Rf2                        | D3                   | 801.5107, 655.4607, 493.3903                                          | F17 |
| 24  | 7.16 | [M + HCOO] <sup>-</sup> | 847.5079  | 801.5000  | C <sub>42</sub> H <sub>74</sub> O <sub>14</sub> | 2.2  | D3-Glc-Rha                             | D3                   | 801.5107, 655.4607, 493.3903                                          | F10 |
| 25  | 7.29 | [M + HCOO] <sup>-</sup> | 1169.5906 | 1123.59   | C <sub>54</sub> H <sub>92</sub> O <sub>24</sub> | -4.2 | (PPT+O)-Rha-Glc-Glc-Glc                | PPT+O                | 1123.5908, 961.5339, 943.5012, 799.4845, 637.4300, 491.3747, 391.3015 | F14 |
| 26  | 7.39 | [M + HCOO] <sup>-</sup> | 845.4926  | 799.4844  | C <sub>42</sub> H <sub>72</sub> O <sub>14</sub> | 3.2  | (PPT+O)-Glc-Rha                        | PPT+O                | 799.4845, 653.4276, 635.4250, 491.3747, 391.2843                      | F8  |
| 27  | 7.50 | [M + HCOO] <sup>-</sup> | 1007.5415 | 961.5372  | C <sub>48</sub> H <sub>82</sub> O <sub>19</sub> | -1.7 | notoginsenoside R6                     | PPT                  | 961.5339, 799.4845, 637.4300, 475.3801                                | F13 |
| 28  | 7.54 | [M + HCOO] <sup>-</sup> | 847.5079  | 801.5000  | C <sub>42</sub> H <sub>74</sub> O <sub>14</sub> | 2.2  | D3-Glc-Rha                             | D3                   | 801.5231, 655.4495, 493.3903                                          | F10 |
| 29  | 7.58 | [M + HCOO] <sup>-</sup> | 845.4926  | 799.4844  | C <sub>42</sub> H <sub>72</sub> O <sub>14</sub> | 3.2  | (PPT+O)-Glc-Rha                        | PPT+O                | 799.4845, 653.4276, 635.4250, 491.3747, 391.2843                      | F8  |
| 30  | 7.66 | [M - H] <sup>-</sup>    | 973.5006  | 973.5008  | C <sub>48</sub> H <sub>78</sub> O <sub>20</sub> | -0.2 | PPT-GlcA-Glc-Glc                       | PPT                  | 973.5006, 811.4442, 749.4343, 631.3915, 475.3706                      | F11 |
| 31  | 7.78 | [M + HCOO] <sup>-</sup> | 861.4861  | 815.4793  | C <sub>42</sub> H <sub>72</sub> O <sub>15</sub> | -1.2 | floralquinquenoside B                  | D4                   | 815.4783, 669.4212, 507.3681, 491.3747                                | F8  |
| 32* | 7.87 | [M + HCOO] <sup>-</sup> | 977.5336  | 931.5266  | C <sub>47</sub> H <sub>80</sub> O <sub>18</sub> | 0.9  | notoginsenoside R1                     | PPT                  | 931.5477, 799.5092, 637.4300, 619.4333, 475.3801                      | F10 |
| 33  | 8.01 | [M + HCOO] <sup>-</sup> | 905.5154  | 905.5110  | C <sub>45</sub> H <sub>78</sub> O <sub>18</sub> | 4.9  | C4-Glc-Rha-Ac                          | C4                   | 859.5049, 817.4885, 671.4439, 653.4276, 509.3770, 491.3747, 391.2843  | F7  |
| 34  | 8.08 | [M + HCOO] <sup>-</sup> | 861.4841  | 815.4793  | C <sub>42</sub> H <sub>72</sub> O <sub>15</sub> | -1.4 | majonoside R1                          | OT                   | 815.4796, 653.4276, 491.3747, 415.3195                                | F10 |
| 35  | 8.09 | [M + HCOO] <sup>-</sup> | 977.5335  | 931.5266  | C <sub>47</sub> H <sub>80</sub> O <sub>18</sub> | 0.8  | ginsenoside Re4                        | PPT                  | 931.5477, 799.5092, 769.4710, 637.4300, 619.4333, 475.3801            | F11 |
| 36  | 8.21 | [M + HCOO] <sup>-</sup> | 861.4841  | 815.4793  | C <sub>42</sub> H <sub>72</sub> O <sub>15</sub> | -1.4 | OT-Glc-Glc                             | OT                   | 815.4796, 653.4276, 491.3747, 415.3195                                | F10 |
| 37  | 8.40 | [M + HCOO] <sup>-</sup> | 989.5347  | 943.5266  | C <sub>48</sub> H <sub>80</sub> O <sub>18</sub> | 2.6  | B2-Glc-Glc-Rha                         | B2                   | 943.5281, 763.4624, 635.4250, 617.4135, 473.3637                      | F14 |
| 38  | 8.45 | [M + HCOO] <sup>-</sup> | 977.5320  | 931.5266  | C <sub>47</sub> H <sub>80</sub> O <sub>18</sub> | -0.7 | notoginsenoside Fp1                    | PPT                  | 931.5210, 799.4969, 637.4300, 619.4116, 475.3801                      | F10 |
| 39  | 8.46 | [M + HCOO] <sup>-</sup> | 1007.543  | 961.5372  | C <sub>48</sub> H <sub>82</sub> O <sub>19</sub> | -0.2 | notoginsenoside N or notoginsenoside M | PPT                  | 961.5339, 799.4845, 637.4189, 475.3801                                | F12 |
| 40  | 8.54 | [M + HCOO] <sup>-</sup> | 1005.5263 | 959.5216  | C <sub>48</sub> H <sub>80</sub> O <sub>19</sub> | -1.3 | notoginsenoside G or isomer            | B2                   | 959.5217, 797.4672, 635.4145, 617.4135, 473.3614                      | F13 |

|     |       |                         |           |           |                                                 |      |                                    |                      |                                                                            |     |
|-----|-------|-------------------------|-----------|-----------|-------------------------------------------------|------|------------------------------------|----------------------|----------------------------------------------------------------------------|-----|
| 41  | 8.83  | [M + HCOO] <sup>-</sup> | 989.5347  | 943.5266  | C <sub>48</sub> H <sub>80</sub> O <sub>18</sub> | 2.6  | B2-Glc-Glc-Rha                     | B2                   | 943.5281, 797.4855,                                                        | F14 |
| 42  | 8.99  | [M + HCOO] <sup>-</sup> | 1007.5425 | 961.5372  | C <sub>48</sub> H <sub>82</sub> O <sub>19</sub> | -0.2 | PPT-Glc-Glc-Glc                    | PPT                  | 635.4360,617.4135,473.3637                                                 | F12 |
| 43* | 9.01  | [M + HCOO] <sup>-</sup> | 845.4891  | 799.4844  | C <sub>42</sub> H <sub>72</sub> O <sub>14</sub> | -1.5 | ginsenoside Rg1                    | PPT                  | 961.5339, 799.4722, 637.4300,475.3801                                      | F8  |
| 44* | 9.17  | [M + HCOO] <sup>-</sup> | 991.5477  | 945.5423  | C <sub>48</sub> H <sub>82</sub> O <sub>18</sub> | -0.6 | ginsenoside Re                     | PPT                  | 799.4845, 637.4300, 475.3801, 391.2843                                     | F10 |
| 45  | 9.27  | [M + HCOO] <sup>-</sup> | 991.5510  | 945.5423  | C <sub>48</sub> H <sub>82</sub> O <sub>18</sub> | 3.2  | PPD-Glc-Rha-Glc                    | PPD                  | 945.5406, 783.4866, 765.4765, 637.4296, 619.4193475.3769, 391.2842         | F4  |
| 46  | 9.44  | [M + HCOO] <sup>-</sup> | 991.5481  | 945.5423  | C <sub>48</sub> H <sub>82</sub> O <sub>18</sub> | -0.2 | PPT-Glc-Rha-Glc                    | PPT                  | 945.5373, 783.4734, 621.4456, 459.3879                                     | F11 |
| 47  | 9.58  | [M + HCOO] <sup>-</sup> | 991.5481  | 945.5423  | C <sub>48</sub> H <sub>82</sub> O <sub>18</sub> | -0.2 | PPT-Glc-Rha-Glc                    | PPT                  | 945.5412,799.4835, 783.4890,765.4776, 637.4306,619.4201, 475.3775,391.2842 | F11 |
| 48  | 9.71  | [M - H] <sup>-</sup>    | 943.4879  | 943.4903  | C <sub>47</sub> H <sub>76</sub> O <sub>19</sub> | -2.5 | B2-GlcA-Glc-Xyl                    | B2                   | 945.5412, 783.4890, 637.4300, 475.3801                                     | F9  |
| 49  | 9.76  | [M + HCOO] <sup>-</sup> | 831.474   | 785.4687  | C <sub>41</sub> H <sub>70</sub> O <sub>14</sub> | -0.9 | majonoside R2 or isomer            | OT                   | 943.4879, 631.3806, 587.3945,473.3542                                      | F8  |
| 50  | 9.84  | [M + HCOO] <sup>-</sup> | 1025.5588 | 979.5478  | C <sub>48</sub> H <sub>84</sub> O <sub>20</sub> | 5.5  | (PPT+H <sub>2</sub> O)-Glc-Glc-Glc | PPT+H <sub>2</sub> O | 785.4704, 653.4276, 491.3747, 415.3195                                     | F14 |
| 51  | 10.06 | [M + HCOO] <sup>-</sup> | 977.5323  | 931.5266  | C <sub>47</sub> H <sub>80</sub> O <sub>18</sub> | -0.4 | PPT-Xyl-Glc-Glc                    | PPT                  | 979.5596, 799.4845, 655.4384, 637.4410, 493.3903                           | F11 |
| 52  | 10.12 | [M + HCOO] <sup>-</sup> | 845.4926  | 799.4844  | C <sub>42</sub> H <sub>72</sub> O <sub>14</sub> | 3.2  | OT-Glc-Rha                         | OT                   | 931.5477, 769.4710, 607.4280, 475.3801                                     | F8  |
| 53  | 10.39 | [M + HCOO] <sup>-</sup> | 845.4926  | 799.4844  | C <sub>42</sub> H <sub>72</sub> O <sub>14</sub> | 3.2  | OT-Glc-Rha                         | OT                   | 799.4845, 653.4276, 491.3747, 415.3195                                     | F8  |
| 54  | 10.49 | [M + HCOO] <sup>-</sup> | 861.4829  | 815.4793  | C <sub>42</sub> H <sub>72</sub> O <sub>15</sub> | -2.8 | OT-Glc-Glc                         | OT                   | 799.4830, 653.4251,635.4147, 491.3729,415.3196                             | F10 |
| 55  | 10.54 | [M + HCOO] <sup>-</sup> | 989.5347  | 943.5266  | C <sub>48</sub> H <sub>80</sub> O <sub>18</sub> | 2.6  | PPT-Rha-Glc-Glc                    | PPT                  | 815.4671, 653.4276, 491.3844, 415.3106                                     | F10 |
| 56  | 10.76 | [M + HCOO] <sup>-</sup> | 1025.5518 | 979.5478  | C <sub>48</sub> H <sub>84</sub> O <sub>20</sub> | -1.9 | (PPT+H <sub>2</sub> O)-Glc-Glc-Glc | PPT+H <sub>2</sub> O | 943.5281, 781.4734, 619.4116,475.3705                                      | F14 |
| 57  | 10.84 | [M - H] <sup>-</sup>    | 973.5006  | 973.5008  | C <sub>48</sub> H <sub>78</sub> O <sub>20</sub> | -0.2 | B2-GlcA-Glc-Glc                    | B2                   | 979.5479,817.4851, 799.4845, 655.4272, 637.4410, 493.3903                  | F11 |
| 58  | 10.88 | [M + HCOO] <sup>-</sup> | 1049.5519 | 1003.5478 | C <sub>50</sub> H <sub>84</sub> O <sub>20</sub> | -1.8 | PPT-Glc-Glc-Glc-Ac                 | PPT                  | 973.5142, 811.4442, 749.4343, 631.3806, 541.3834,473.3542                  | F11 |
| 59  | 11.03 | [M + HCOO] <sup>-</sup> | 1169.5906 | 1123.5900 | C <sub>54</sub> H <sub>92</sub> O <sub>24</sub> | -4.2 | PPT-Rha-Glc-Glc-Glc                | PPT                  | 1003.5544,961.5339, 799.4845, 637.4300, 475.3801                           | F14 |
| 60  | 11.07 | [M + HCOO] <sup>-</sup> | 1005.5260 | 959.5216  | C <sub>48</sub> H <sub>80</sub> O <sub>19</sub> | -1.6 | B2-Glc-Glc-Glc                     | B2                   | 1123.5908, 943.5146, 781.4734, 619.4008, 475.5515                          | F13 |
| 61  | 11.14 | [M + HCOO] <sup>-</sup> | 993.5288  | 947.5216  | C <sub>47</sub> H <sub>80</sub> O <sub>19</sub> | -0.6 | PPT-Glc-Glc-Xyl                    | PPT                  | 959.5173, 797.4731, 779.4482, 635.4030, 473.3542                           | F13 |
| 62  | 11.18 | [M - H] <sup>-</sup>    | 887.4979  | 841.4949  | C <sub>44</sub> H <sub>74</sub> O <sub>15</sub> | -2.8 | (PPT+O)-Glc-Rha-mal                | PPT+O                | 947.5296, 815.4796, 799.4845, 765.4304, 653.4498,475.3705                  | F7  |
| 63  | 11.19 | [M + HCOO] <sup>-</sup> | 1019.5403 | 973.5372  | C <sub>49</sub> H <sub>82</sub> O <sub>19</sub> | -2.4 | D2-Glc-Rha-Glc                     | D2                   | 799.4845, 653.4276, 635.4139, 491.3747, 391.2843                           | F10 |
|     |       |                         |           |           |                                                 |      |                                    |                      | 973.5415,811.4940,793.4670,665.4262,647.4220,503.3729,475.3781             |     |

|    |       |                         |           |           |                                                 |      |                                                                                                                                           |       |                                                                       |     |
|----|-------|-------------------------|-----------|-----------|-------------------------------------------------|------|-------------------------------------------------------------------------------------------------------------------------------------------|-------|-----------------------------------------------------------------------|-----|
| 64 | 11.20 | [M – H] <sup>–</sup>    | 941.4769  | 941.4746  | C <sub>47</sub> H <sub>74</sub> O <sub>19</sub> | 2.4  | (OA+O)-GlcA-Xyl-Glc                                                                                                                       | OA+O  | 941.4769, 779.4239, 717.4222, 629.3741, 471.3516                      | F10 |
| 65 | 11.20 | [M – H] <sup>–</sup>    | 943.4879  | 943.4903  | C <sub>47</sub> H <sub>76</sub> O <sub>19</sub> | -2.5 | B2-GlcA-Glc-Xyl                                                                                                                           | B2    | 943.4879, 781.4368, 719.4354, 631.3806, 587.3945, 473.3637            | F9  |
| 66 | 11.23 | [M + HCOO] <sup>–</sup> | 1005.5268 | 959.5216  | C <sub>48</sub> H <sub>80</sub> O <sub>19</sub> | -0.8 | notoginsenoside G or isomer                                                                                                               | B2    | 959.5173, 797.4731, 635.4030, 473.3542                                | F13 |
| 67 | 11.26 | [M + HCOO] <sup>–</sup> | 1169.5959 | 1123.5900 | C <sub>54</sub> H <sub>92</sub> O <sub>24</sub> | -0.1 | 6-O-[β-D-glucopyranosyl-(1 → 2)-β-D-glucopyranosyl]-20-O-[β-D-glucopyranosyl-(1 → 4)-β-D-glucopyranosyl]-20(S)-protopanaxatriol           | PPT   | 1123.5907, 961.5367, 799.4810, 781.4718, 637.4304, 475.3771, 391.2861 | F14 |
| 68 | 11.28 | [M + HCOO] <sup>–</sup> | 1019.5403 | 973.5372  | C <sub>49</sub> H <sub>82</sub> O <sub>19</sub> | -2.4 | D2-Glc-Rha-Glc                                                                                                                            | D2    | 973.5415, 811.4940, 665.4262, 503.3729                                | F11 |
| 69 | 11.31 | [M – H] <sup>–</sup>    | 815.4787  | 815.4793  | C <sub>42</sub> H <sub>72</sub> O <sub>15</sub> | -1.5 | (PPT+O)-Glc-Glc                                                                                                                           | PPT+O | 653.4276, 491.3747, 391.2756                                          | F7  |
| 70 | 11.35 | [M – H] <sup>–</sup>    | 973.5006  | 973.5008  | C <sub>48</sub> H <sub>78</sub> O <sub>20</sub> | -0.2 | B2-GlcA-Glc-Glc                                                                                                                           | B2    | 973.5142, 811.4442, 761.4246, 749.4343, 631.3915, 541.3936, 473.3732  | F11 |
| 71 | 11.35 | [M + HCOO] <sup>–</sup> | 1005.5268 | 959.5216  | C <sub>48</sub> H <sub>80</sub> O <sub>19</sub> | -0.8 | notoginsenoside G or isomer                                                                                                               | B2    | 959.5173, 797.4731, 779.4482, 635.4030, 473.3542                      | F13 |
| 72 | 11.35 | [M + HCOO] <sup>–</sup> | 1005.5268 | 959.5216  | C <sub>48</sub> H <sub>80</sub> O <sub>19</sub> | -0.8 | B2-Glc-Glc-Glc-Glc                                                                                                                        | B2    | 959.5173, 797.4731, 779.4482, 635.4030, 473.3542                      | F13 |
| 73 | 11.36 | [M + HCOO] <sup>–</sup> | 1171.6075 | 1125.6057 | C <sub>54</sub> H <sub>94</sub> O <sub>24</sub> | -3.2 | D1-Glc-Glc-Glc-Glc                                                                                                                        | D1    | 1125.6118, 963.5526, 801.4984, 783.4890, 639.4382, 621.4456, 477.3911 | F14 |
| 74 | 11.45 | [M + HCOO] <sup>–</sup> | 1169.5937 | 1123.5900 | C <sub>54</sub> H <sub>92</sub> O <sub>24</sub> | -2   | 6-O-[β-D-glucopyranosyl-(1 → 2)-β-D-glucopyranosyl]-20-O-[β-D-glucopyranosyl-(1 → 4)-β-D-glucopyranosyl]-20(S)-protopanaxatriol or isomer | PPT   | 1123.5908, 961.5474, 799.4845, 637.4300, 475.3705                     | F14 |
| 75 | 11.49 | [M + HCOO] <sup>–</sup> | 903.4917  | 857.4899  | C <sub>44</sub> H <sub>74</sub> O <sub>16</sub> | -4.7 | yesaninoside A                                                                                                                            | OT    | 653.4276, 491.3651, 415.3195                                          | F8  |
| 76 | 11.51 | [M – H] <sup>–</sup>    | 943.4879  | 943.4903  | C <sub>47</sub> H <sub>76</sub> O <sub>19</sub> | -2.5 | B2-GlcA-Glc-Xyl                                                                                                                           | B2    | 943.4879, 631.3806, 587.3945, 473.3637                                | F9  |
| 77 | 11.52 | [M + HCOO] <sup>–</sup> | 1023.5373 | 977.5321  | C <sub>48</sub> H <sub>82</sub> O <sub>20</sub> | -0.9 | C1-Glc-Glc-Glc                                                                                                                            | C1    | 977.5378, 815.4547, 653.4164, 491.3554, 475.3896                      | F13 |

|    |       |                         |           |           |                                                  |      |                                |                      |                                                                                |     |
|----|-------|-------------------------|-----------|-----------|--------------------------------------------------|------|--------------------------------|----------------------|--------------------------------------------------------------------------------|-----|
| 78 | 11.53 | [M – H] <sup>–</sup>    | 815.4787  | 815.4793  | C <sub>42</sub> H <sub>72</sub> O <sub>15</sub>  | -1.5 | PPT-GlcA-Rha                   | PPT                  | 815.4796,651.3975, 475.3590                                                    | F7  |
| 79 | 11.55 | [M + HCOO] <sup>–</sup> | 1273.6453 | 1227.6374 | C <sub>58</sub> H <sub>100</sub> O <sub>27</sub> | 1.9  | D1-Xyl-Glc-Glc-Glc-Xyl         | D1                   | 1227.6417, 1095.6045,933.5613,797.4608, 477.407                                | F14 |
| 80 | 11.61 | [M + HCOO] <sup>–</sup> | 863.5040  | 817.4949  | C <sub>42</sub> H <sub>74</sub> O <sub>15</sub>  | 4.2  | (PPT+H <sub>2</sub> O)-Glc-Glc | PPT+H <sub>2</sub> O | 817.5010,655.4384,493.3903,375.2808                                            | F15 |
| 81 | 11.61 | [M + HCOO] <sup>–</sup> | 1167.5791 | 1121.5744 | C <sub>54</sub> H <sub>90</sub> O <sub>24</sub>  | -1.2 | B2-Glc-Glc-Glc-Glc             | B2                   | 1121.5864, 959.5173, 797.4608,779.4727,635.4250,473.3542                       | F14 |
| 82 | 11.66 | [M – H] <sup>–</sup>    | 809.4302  | 809.4323  | C <sub>42</sub> H <sub>66</sub> O <sub>15</sub>  | -2.6 | (OA+O)-GlcA-Glc                | OA+O                 | 809.4302, 647.3802, 585.3853, 471.3516, 439.3293                               | F8  |
| 83 | 11.67 | [M – H] <sup>–</sup>    | 811.4442  | 811.4480  | C <sub>42</sub> H <sub>68</sub> O <sub>15</sub>  | -4.7 | (OA+H <sub>2</sub> O)-GlcA-Glc | OA+H <sub>2</sub> O  | 811.4442, 649.3929, 587.3945, 473.3637,455.3628                                | F7  |
| 84 | 11.67 | [M + HCOO] <sup>–</sup> | 987.5576  | 987.5529  | C <sub>50</sub> H <sub>84</sub> O <sub>19</sub>  | -1.1 | acetyl-ginsenoside Re          | PPT                  | 945.5417,799.4836,783.4878,637.4311,619.4204,475.3780,391.284                  | F9  |
| 85 | 11.78 | [M + HCOO] <sup>–</sup> | 1167.5801 | 1121.5744 | C <sub>54</sub> H <sub>90</sub> O <sub>24</sub>  | -0.3 | B2-Glc-Glc-Glc-Glc             | B2                   | 1121.5864, 959.5173, 797.4608,779.4604,635.4139,617.4026,473.3542              | F14 |
| 86 | 11.82 | [M + HCOO] <sup>–</sup> | 1007.5424 | 961.5372  | C <sub>48</sub> H <sub>82</sub> O <sub>19</sub>  | -0.9 | PPT-Glc-Glc-Glc                | PPT                  | 961.5339, 799.4969, 781.4734, 619.4116, 537.3369,475.8467                      | F13 |
| 87 | 11.85 | [M + HCOO] <sup>–</sup> | 863.504   | 817.4949  | C <sub>42</sub> H <sub>74</sub> O <sub>15</sub>  | 4.2  | (PPT+H <sub>2</sub> O)-Glc-Glc | PPT+H <sub>2</sub> O | 817.4940, 655.4412,493.3887, 375.2906                                          | F15 |
| 88 | 11.85 | [M – H] <sup>–</sup>    | 943.5281  | 943.5266  | C <sub>48</sub> H <sub>80</sub> O <sub>18</sub>  | 1.6  | B2-Glc-Glc-Rha                 | B2                   | 943.5281, 797.4855, 763.4382, 635.4360, 473.3447                               | F10 |
| 89 | 11.93 | [M + HCOO] <sup>–</sup> | 1023.5377 | 977.5321  | C <sub>48</sub> H <sub>82</sub> O <sub>20</sub>  | -0.5 | C1-Glc-Glc-Glc                 | C1                   | 977.5378, 815.4921, 653.4146,637.4300,491.3651,475.3801                        | F13 |
| 90 | 12.03 | [M – H] <sup>–</sup>    | 941.4769  | 941.4746  | C <sub>47</sub> H <sub>74</sub> O <sub>19</sub>  | 2.4  | (OA-2H)-GlcA-Xyl-Glc           | OA-2H                | 941.4769, 779.4239, 761.4125, 629.3741, 523.3785, 453.3336, 409.3517           | F8  |
| 91 | 12.08 | [M + HCOO] <sup>–</sup> | 887.4979  | 841.4949  | C <sub>44</sub> H <sub>74</sub> O <sub>15</sub>  | -2.8 | vinaginsenoside R1             | OT                   | 841.4848, 799.4722, 653.4387, 491.3747,415.0081                                | F6  |
| 92 | 12.12 | [M + HCOO] <sup>–</sup> | 863.504   | 817.4949  | C <sub>42</sub> H <sub>74</sub> O <sub>15</sub>  | 4.2  | (PPT+H <sub>2</sub> O)-Glc-Glc | PPT+H <sub>2</sub> O | 817.5010,655.4384,493.3903,375.2893                                            | F14 |
| 93 | 12.14 | [M + HCOO] <sup>–</sup> | 861.4848  | 815.4793  | C <sub>42</sub> H <sub>72</sub> O <sub>15</sub>  | -0.6 | OT-Glc-Glc                     | OT                   | 815.4796, 653.4276, 491.3747, 415.3195                                         | F9  |
| 94 | 12.26 | [M – H] <sup>–</sup>    | 941.4769  | 941.4746  | C <sub>47</sub> H <sub>74</sub> O <sub>19</sub>  | 2.4  | (OA+O)-GlcA-Xyl-Glc            | OA+O                 | 941.4769, 779.4239, 717.4222, 629.3741, 585.3748, 471.3516, 453.3336, 409.3429 | F8  |
| 95 | 12.36 | [M + HCOO] <sup>–</sup> | 1007.5425 | 961.5372  | C <sub>48</sub> H <sub>82</sub> O <sub>19</sub>  | -0.2 | ginsenoside Re1                | PPT                  | 961.5339, 799.4722, 637.4300, 475.3801                                         | F13 |
| 96 | 12.55 | [M + HCOO] <sup>–</sup> | 1007.5415 | 961.5372  | C <sub>48</sub> H <sub>82</sub> O <sub>19</sub>  | -1.7 | notoginsenoside R6             | PPT                  | 961.5339, 799.4722, 781.4734, 637.4410, 475.3610                               | F13 |
| 97 | 12.67 | [M – H] <sup>–</sup>    | 1249.5881 | 1249.5853 | C <sub>59</sub> H <sub>94</sub> O <sub>28</sub>  | 2.2  | OA-Glc-Xyl-Glc-Glc-GlcA        | OA                   | 1249.5881, 947.4624, 731.4323, 569.3837, 523.3785, 455.3534                    | F14 |

|      |       |                         |           |           |                                                 |      |                                |                      |                                                                      |     |
|------|-------|-------------------------|-----------|-----------|-------------------------------------------------|------|--------------------------------|----------------------|----------------------------------------------------------------------|-----|
| 98   | 12.68 | [M + HCOO] <sup>-</sup> | 887.4987  | 841.4949  | C <sub>44</sub> H <sub>74</sub> O <sub>15</sub> | -2.6 | OT-Glc-Rha-Ac                  | OT                   | 841.4975, 799.4845, 653.4276, 491.3651, 415.3195                     | F6  |
| 99   | 12.73 | [M – H] <sup>-</sup>    | 809.4302  | 833.4323  | C <sub>44</sub> H <sub>66</sub> O <sub>15</sub> | -2.6 | (OA-2H)-GlcA-Glc               | OA-2H                | 809.4302, 629.3632, 585.3853, 567.3744, 453.3429, 409.3429           | F6  |
| 100  | 12.99 | [M – H] <sup>-</sup>    | 1087.5328 | 1087.5325 | C <sub>53</sub> H <sub>84</sub> O <sub>23</sub> | -0.3 | stipuleanoside R2 or isomer    | OA                   | 1087.5391, 763.4261, 747.4272, 613.3835, 455.3441                    | F12 |
| 101  | 13.19 | [M – H] <sup>-</sup>    | 971.4852  | 971.4852  | C <sub>48</sub> H <sub>76</sub> O <sub>20</sub> | 0    | (OA+O)-Glc-Glc-GlcA            | OA+O                 | 971.4852, 809.4302, 629.3522, 585.3853, 471.3422                     | F15 |
| 102  | 13.21 | [M + HCOO] <sup>-</sup> | 831.4727  | 785.4687  | C <sub>41</sub> H <sub>70</sub> O <sub>14</sub> | -2.5 | majonoside R2 or isomer        | OT                   | 785.4704, 653.4276, 491.3747, 415.3195                               | F7  |
| 103  | 13.21 | [M – H] <sup>-</sup>    | 1087.5323 | 1087.5325 | C <sub>53</sub> H <sub>84</sub> O <sub>23</sub> | -0.7 | OA-GlcA-Xyl-Glc-Glc            | OA                   | 1087.5391, 793.4334, 613.3835, 455.3628                              | F12 |
| 104  | 13.22 | [M – H] <sup>-</sup>    | 971.4852  | 971.4852  | C <sub>48</sub> H <sub>76</sub> O <sub>20</sub> | 0    | (OA+O)-GlcA-Glc-Glc            | OA+O                 | 971.4852, 809.4302, 747.4272, 629.3632, 585.3748, 471.3422           | F10 |
| 105  | 13.33 | [M – H] <sup>-</sup>    | 1117.5415 | 1117.5431 | C <sub>54</sub> H <sub>86</sub> O <sub>24</sub> | -1.9 | (OA-2H)-Rha-Glc-Glc-GlcA       | OA-2H                | 1117.5389, 943.5281, 781.4734, 619.4225, 567.3616, 453.3131          | F11 |
| 106  | 13.33 | [M – H] <sup>-</sup>    | 1117.5389 | 1117.5431 | C <sub>54</sub> H <sub>86</sub> O <sub>24</sub> | -3   | D2-Xyl-Rha-GlcA-Glc            | D2                   | 1117.5389, 955.4866, 761.4005, 625.3381, 553.3573, 503.3827          | F11 |
| 107  | 13.35 | [M – H] <sup>-</sup>    | 971.4811  | 971.4852  | C <sub>48</sub> H <sub>76</sub> O <sub>20</sub> | -4.2 | (OA+O)-Glc-Glc-GlcA            | OA+O                 | 971.4811, 809.4269, 629.3605, 585.3723, 539.3611, 471.3307, 439.3184 | F4  |
| 108  | 13.36 | [M + HCOO] <sup>-</sup> | 845.4907  | 799.4844  | C <sub>42</sub> H <sub>72</sub> O <sub>14</sub> | 0.4  | ginsenoside Re2                | PPT                  | 799.4845, 637.4300, 475.3801, 391.2843                               | F8  |
| 109  | 13.40 | [M – H] <sup>-</sup>    | 971.4852  | 971.4852  | C <sub>48</sub> H <sub>76</sub> O <sub>20</sub> | 0    | (OA+O)-GlcA-Glc-Glc            | OA+O                 | 971.4852, 809.4302, 629.3632, 585.3748, 471.3422                     | F2  |
| 110  | 13.40 | [M – H] <sup>-</sup>    | 1117.5389 | 1117.5431 | C <sub>54</sub> H <sub>86</sub> O <sub>24</sub> | -3.8 | OA-GlcA-Glc-GlcA-Rha           | OA                   | 1117.5389, 793.4334, 701.4180, 613.3619, 569.3837, 455.3534          | F14 |
| 111  | 13.44 | [M – H] <sup>-</sup>    | 971.4852  | 971.4852  | C <sub>48</sub> H <sub>76</sub> O <sub>20</sub> | 0    | (OA+O)-Glc-Glc-GlcA            | OA+O                 | 971.4852, 831.4190, 809.4302, 747.4272, 629.3632, 585.3748, 471.3422 | F12 |
| 112  | 13.48 | [M – H] <sup>-</sup>    | 1087.5321 | 1087.5325 | C <sub>53</sub> H <sub>84</sub> O <sub>23</sub> | -0.9 | OA-GlcA-Xyl-Glc-Glc            | OA                   | 1087.5391, 925.4799, 763.4261, 613.3727, 455.3441                    | F8  |
| 113  | 13.58 | [M – H] <sup>-</sup>    | 971.4852  | 971.4852  | C <sub>48</sub> H <sub>76</sub> O <sub>20</sub> | 0    | (OA+O)-Glc-Glc-GlcA            | OA+O                 | 971.4852, 809.4302, 747.4272, 629.3632, 585.3748, 471.3422           | F12 |
| 114* | 13.59 | [M + HCOO] <sup>-</sup> | 845.4879  | 799.4844  | C <sub>42</sub> H <sub>72</sub> O <sub>14</sub> | -3   | pseudoginsenoside F11          | OT                   | 799.4845, 653.4276, 491.3747, 415.3195                               | F7  |
| 115  | 13.61 | [M – H] <sup>-</sup>    | 941.4769  | 941.4746  | C <sub>47</sub> H <sub>74</sub> O <sub>19</sub> | 2.4  | (OA+O)-GlcA-Xyl-Glc            | OA+O                 | 941.4769, 779.4239, 717.4222, 629.3741, 585.3748, 471.3516           | F10 |
| 116  | 13.62 | [M – H] <sup>-</sup>    | 1087.5319 | 1087.5325 | C <sub>53</sub> H <sub>84</sub> O <sub>23</sub> | -1   | OA-GlcA-Xyl-Glc-Glc            | OA                   | 1087.5391, 763.4261, 613.3727, 455.3534                              | F8  |
| 117  | 13.69 | [M + HCOO] <sup>-</sup> | 845.4899  | 799.4844  | C <sub>42</sub> H <sub>72</sub> O <sub>14</sub> | -0.7 | ginsenoside Rf                 | PPT                  | 799.4845, 637.4410, 475.3801, 391.2843                               | F13 |
| 118  | 13.79 | [M – H] <sup>-</sup>    | 1087.5304 | 1087.5325 | C <sub>53</sub> H <sub>84</sub> O <sub>23</sub> | -2.5 | OA-GlcA-Xyl-Glc-Glc            | OA                   | 1087.5391, 763.4261, 613.3727, 455.3534                              | F8  |
| 119  | 13.83 | [M + HCOO] <sup>-</sup> | 863.5040  | 817.4949  | C <sub>42</sub> H <sub>74</sub> O <sub>15</sub> | 4.2  | (PPT+H <sub>2</sub> O)-Glc-Glc | PPT+H <sub>2</sub> O | 817.5010, 655.4384, 493.3903, 475.3801                               | F14 |

|      |       |                         |           |           |                                                  |      |                             |      |                                                                                  |     |
|------|-------|-------------------------|-----------|-----------|--------------------------------------------------|------|-----------------------------|------|----------------------------------------------------------------------------------|-----|
| 120  | 13.85 | [M – H] <sup>–</sup>    | 1087.5320 | 1087.5325 | C <sub>53</sub> H <sub>84</sub> O <sub>23</sub>  | -1   | OA-GlcA-Xyl-Glc-Glc         | OA   | 1087.5391, 785.4092, 763.4261, 613.3727, 569.3837, 455.3441                      | F12 |
| 121  | 13.97 | [M + HCOO] <sup>–</sup> | 1285.6404 | 1239.6374 | C <sub>59</sub> H <sub>100</sub> O <sub>27</sub> | -2.3 | OA-GlcA-Glc-Glc-Glc-Xyl     | OA   | 1239.6359, 1107.5906, 945.5546, 783.4767, 621.4674, 569.3837, 455.3441           | F14 |
| 122  | 13.99 | [M – H] <sup>–</sup>    | 1057.5214 | 1057.5219 | C <sub>52</sub> H <sub>82</sub> O <sub>22</sub>  | -0.5 | OA-GlcA-Xyl-Glc-Xyl         | OA   | 1057.5214, 763.4261, 613.3727, 569.3837, 523.3785, 455.3628                      | F9  |
| 123  | 14.03 | [M – H] <sup>–</sup>    | 1087.5315 | 1087.5325 | C <sub>53</sub> H <sub>84</sub> O <sub>23</sub>  | -1.5 | OA-GlcA-Xyl-Glc-Glc         | OA   | 1087.5391, 785.4092, 763.4261, 613.3727, 569.3837, 455.3441                      | F12 |
| 124  | 14.05 | [M – H] <sup>–</sup>    | 955.4903  | 955.4903  | C <sub>48</sub> H <sub>76</sub> O <sub>19</sub>  | 0.2  | OA-GlcA-Glc-Glc             | OA   | 955.4905, 653.3717, 631.3806, 569.3837, 455.3534                                 | F9  |
| 125  | 14.18 | [M – H] <sup>–</sup>    | 1087.5295 | 1087.5325 | C <sub>53</sub> H <sub>84</sub> O <sub>23</sub>  | -3.3 | OA-GlcA-Xyl-Glc-Glc         | OA   | 1087.5391, 763.4261, 713.4323, 569.3837                                          | F12 |
| 126  | 14.20 | [M + HCOO] <sup>–</sup> | 815.4780  | 769.4738  | C <sub>41</sub> H <sub>70</sub> O <sub>13</sub>  | -2.2 | notoginsenoside R2          | PPT  | 769.4710, 637.4300, 475.3801, 391.2843                                           | F7  |
| 127  | 14.20 | [M – H] <sup>–</sup>    | 1087.5343 | 1087.5325 | C <sub>53</sub> H <sub>84</sub> O <sub>23</sub>  | 1.1  | OA-GlcA-Xyl-Glc-Glc         | OA   | 1087.5391, 925.4799, 763.4261                                                    | F8  |
| 128  | 14.38 | [M – H] <sup>–</sup>    | 1087.5338 | 1087.5325 | C <sub>53</sub> H <sub>84</sub> O <sub>23</sub>  | 0.7  | OA-GlcA-Xyl-Glc-Glc         | OA   | 1087.5391, 763.4261, 729.4259, 569.3837                                          | F12 |
| 129  | 14.41 | [M – H] <sup>–</sup>    | 941.4769  | 941.4746  | C <sub>47</sub> H <sub>74</sub> O <sub>19</sub>  | 2.4  | (OA+O)-GlcA-Xyl-Glc         | OA+O | 941.4769, 779.4239, 717.4222, 631.3806, 585.3748, 569.3733, 471.3422             | F8  |
| 130* | 14.57 | [M – H] <sup>–</sup>    | 955.4903  | 955.4903  | C <sub>48</sub> H <sub>76</sub> O <sub>19</sub>  | 0.2  | hemsgiganoside B            | OA   | 955.4891, 631.3838, 455.3519                                                     | F9  |
| 131  | 14.66 | [M – H] <sup>–</sup>    | 1087.534  | 1087.5325 | C <sub>53</sub> H <sub>84</sub> O <sub>23</sub>  | 0.9  | stipuleanoside R2 or isomer | OA   | 1087.5391, 785.4092, 763.4261, 613.3727, 569.3837, 497.3557, 455.3441            | F11 |
| 132  | 14.68 | [M – H] <sup>–</sup>    | 955.4905  | 955.4903  | C <sub>48</sub> H <sub>76</sub> O <sub>19</sub>  | 0.2  | OA-GlcA-Glc-Glc             | OA   | 955.4905, 631.3915, 455.3441                                                     | F4  |
| 133  | 14.73 | [M – H] <sup>–</sup>    | 955.4905  | 955.4903  | C <sub>48</sub> H <sub>76</sub> O <sub>19</sub>  | 0.2  | OA-GlcA-Glc-Glc             | OA   | 955.4905, 793.4334, 761.4125, 731.4323, 569.3837, 523.3785, 455.3534             | F9  |
| 134  | 14.85 | [M – H] <sup>–</sup>    | 941.4769  | 941.4746  | C <sub>47</sub> H <sub>74</sub> O <sub>19</sub>  | 2.4  | (OA+O)-GlcA-Xyl-Glc         | OA+O | 941.4769, 779.4239, 717.4222, 631.3806, 585.3748, 569.3733, 471.3422             | F11 |
| 135  | 14.93 | [M – H] <sup>–</sup>    | 955.4905  | 955.4903  | C <sub>48</sub> H <sub>76</sub> O <sub>19</sub>  | 0.2  | OA-GlcA-Glc-Glc             | OA   | 955.4905, 631.3806, 569.3837, 455.3834                                           | F9  |
| 136  | 14.97 | [M – H] <sup>–</sup>    | 1087.5316 | 1087.5325 | C <sub>53</sub> H <sub>84</sub> O <sub>23</sub>  | -1.3 | stipuleanoside R2 or isomer | OA   | 1087.5391, 925.4932, 731.4441, 613.3727, 569.3837, 523.3785, 411.3687            | F11 |
| 137  | 14.98 | [M + HCOO] <sup>–</sup> | 1009.5534 | 963.5529  | C <sub>48</sub> H <sub>84</sub> O <sub>19</sub>  | -4.9 | D1-Glc-Glc-Glc              | D1   | 963.5526, 801.4984, 639.4492, 477.3911                                           | F15 |
| 138  | 15.07 | [M + HCOO] <sup>–</sup> | 1285.6423 | 1239.6374 | C <sub>59</sub> H <sub>100</sub> O <sub>27</sub> | -0.5 | (OA+O)-GlcA-Xyl-Glc-Glc-Xyl | OA+O | 1239.6359, 1107.5906, 941.4769, 779.4239, 629.3741, 585.3959, 471.3516, 455.3628 | F14 |
| 139  | 15.29 | [M – H] <sup>–</sup>    | 941.4769  | 941.4746  | C <sub>47</sub> H <sub>74</sub> O <sub>19</sub>  | 2.4  | (OA+O)-GlcA-Xyl-Glc         | OA+O | 941.4769, 779.4239, 717.4222, 629.3632, 585.3748, 471.3422, 455.3534             | F8  |
| 140  | 15.41 | [M – H] <sup>–</sup>    | 1249.5881 | 1249.5853 | C <sub>59</sub> H <sub>94</sub> O <sub>28</sub>  | 2.2  | OA-Glc-Xyl-Glc-Glc-GlcA     | OA   | 1249.5881, 955.4905, 731.4441, 653.3717, 631.3806, 569.3837, 523.3785, 455.3534  | F14 |
| 141  | 15.43 | [M + HCOO] <sup>–</sup> | 829.4938  | 783.4895  | C <sub>42</sub> H <sub>72</sub> O <sub>13</sub>  | -2.1 | ginsenoside Rg2             | PPT  | 783.4890, 637.4300, 475.3801, 391.2843                                           | F6  |
| 142* | 15.52 | [M + HCOO] <sup>–</sup> | 683.4352  | 637.4316  | C <sub>36</sub> H <sub>62</sub> O <sub>9</sub>   | -3.5 | ginsenoside Rh1             | PPT  | 637.4189, 585.3959, 475.3801, 391.2843                                           | F5  |

|      |       |                         |           |           |                                                 |      |                                  |       |                                                                                 |     |
|------|-------|-------------------------|-----------|-----------|-------------------------------------------------|------|----------------------------------|-------|---------------------------------------------------------------------------------|-----|
| 143  | 15.52 | [M + HCOO] <sup>-</sup> | 829.4937  | 783.4895  | C <sub>42</sub> H <sub>72</sub> O <sub>13</sub> | -1.8 | PPT-Glc-Rha                      | PPT   | 783.4890,585.3853,475.3801                                                      | F18 |
| 144  | 15.60 | [M – H] <sup>-</sup>    | 955.4866  | 955.4903  | C <sub>48</sub> H <sub>76</sub> O <sub>19</sub> | 3.9  | (OA+O)-GlcA-Xyl-Glc-methyl ester | OA+O  | 955.4866,941.4730,631.3779,471.3497                                             | F4  |
| 145  | 15.61 | [M – H] <sup>-</sup>    | 1057.5214 | 1056.5141 | C <sub>52</sub> H <sub>82</sub> O <sub>22</sub> | -0.5 | OA-GlcA-Xyl-Glc-Xyl              | OA    | 925.4799, 763.4261, 613.3727, 455.3534                                          | F8  |
| 146  | 15.64 | [M – H] <sup>-</sup>    | 1107.6051 | 1107.5587 | C <sub>53</sub> H <sub>88</sub> O <sub>24</sub> | 0.2  | OA-Xyl-Rha-GlcA-Glc              | OA    | 1107.6051, 955.4636, 731.4441, 569.3733, 523.3785, 455.3628                     | F1  |
| 147  | 15.66 | [M – H] <sup>-</sup>    | 1087.5311 | 1087.5325 | C <sub>53</sub> H <sub>84</sub> O <sub>23</sub> | -1.8 | OA-GlcA-Xyl-Glc-Glc              | OA    | 1087.5247, 731.4323, 613.3727, 569.3837, 523.3785, 455.3534                     | F7  |
| 148  | 15.70 | [M + HCOO] <sup>-</sup> | 1255.6312 | 1209.6268 | C <sub>58</sub> H <sub>98</sub> O <sub>26</sub> | -0.9 | OA-GlcA-Xyl-Glc-Xyl-Xyl          | OA    | 1209.6230, 1077.5820, 783.5012, 569.3837, 455.3628                              | F14 |
| 149  | 15.78 | [M + HCOO] <sup>-</sup> | 829.4943  | 783.4895  | C <sub>42</sub> H <sub>72</sub> O <sub>13</sub> | -1.4 | ginsenoside Rg2 or isomer        | PPT   | 783.4890,637.4300,475.3801,391.2843                                             | F11 |
| 150  | 15.88 | [M + HCOO] <sup>-</sup> | 1153.6058 | 1153.6006 | C <sub>55</sub> H <sub>94</sub> O <sub>25</sub> | 4.5  | PPD-Glc-Glc-Glc-Glc              | PPD   | 1107.6196,945.5546,783.4890,621.7069,459.7811                                   | F4  |
| 151  | 15.99 | [M + HCOO] <sup>-</sup> | 1009.5534 | 963.5529  | C <sub>48</sub> H <sub>84</sub> O <sub>19</sub> | -4.9 | D1-Glc-Glc-Glc                   | D1    | 963.5526, 801.4984, 639.4492, 477.3911                                          | F15 |
| 152  | 16.00 | [M + HCOO] <sup>-</sup> | 1249.5881 | 1249.5853 | C <sub>59</sub> H <sub>94</sub> O <sub>28</sub> | 2.2  | PPT-Glc-Rha-GlcA-Glc-Xyl         | PPT   | 1249.5881,1153.5536,955.5040,637.4300,475.3801,391.2929                         | F14 |
| 153  | 16.02 | [M – H] <sup>-</sup>    | 1087.5311 | 1087.5325 | C <sub>53</sub> H <sub>84</sub> O <sub>23</sub> | 6.1  | OA-GlcA-Glc-Xyl-Rha              | OA    | 1087.5247, 947.4785, 881.4459, 809.4427, 647.3802, 613.3727, 569.3727, 455.3534 | F7  |
| 154  | 16.11 | [M + HCOO] <sup>-</sup> | 829.4947  | 783.4895  | C <sub>42</sub> H <sub>72</sub> O <sub>13</sub> | -1   | ginsenoside Rg2 or isomer        | PPT   | 783.4890, 637.4300, 475.3801, 391.2843                                          | F10 |
| 155  | 16.12 | [M – H] <sup>-</sup>    | 923.4617  | 923.4640  | C <sub>47</sub> H <sub>72</sub> O <sub>18</sub> | -2.5 | (OA-2H)-GlcA-Xyl-Glc             | OA-2H | 923.4617, 761.4125, 699.4070, 611.3520, 567.3640, 453.3336                      | F9  |
| 156  | 16.13 | [M – H] <sup>-</sup>    | 809.4302  | 809.4323  | C <sub>42</sub> H <sub>66</sub> O <sub>15</sub> | -2.6 | (OA+O)-Glc-GlcA                  | OA+O  | 809.4302, 647.3802, 629.3741, 585.3853,471.3516, 453.3429                       | F6  |
| 157  | 16.19 | [M – H] <sup>-</sup>    | 809.4302  | 809.4323  | C <sub>42</sub> H <sub>66</sub> O <sub>15</sub> | -2.6 | (OA+O)-Glc-GlcA                  | OA+O  | 809.4178, 647.3802, 471.3422                                                    | F16 |
| 158  | 16.26 | [M – H] <sup>-</sup>    | 1087.5295 | 1087.5325 | C <sub>53</sub> H <sub>84</sub> O <sub>23</sub> | -3.3 | stipuleanoside R2 or isomer      | OA    | 1087.5247, 731.4323, 569.3837, 523.3785,455.3534                                | F11 |
| 159  | 16.29 | [M – H] <sup>-</sup>    | 1057.5214 | 1057.5219 | C <sub>52</sub> H <sub>82</sub> O <sub>22</sub> | -2.5 | (OA-2H)-Glc-GlcA-Xyl-Xyl         | OA-2H | 1057.4617, 923.4617, 791.4297, 613.3727, 567.3640,453.3336                      | F7  |
| 160  | 16.31 | [M – H] <sup>-</sup>    | 1057.5214 | 1056.5141 | C <sub>52</sub> H <sub>81</sub> O <sub>22</sub> | -0.5 | OA-GlcA-Xyl-Glc-Xyl              | OA    | 1057.5214, 701.4296, 523.3785,497.3557,455.3534                                 | F9  |
| 161* | 16.45 | [M + HCOO] <sup>-</sup> | 683.4349  | 637.4316  | C <sub>36</sub> H <sub>62</sub> O <sub>9</sub>  | -3.1 | 20(R)-ginsenoside Rh1            | PPT   | 637.4189,475.7800                                                               | F5  |
| 162  | 16.56 | [M – H] <sup>-</sup>    | 1087.5316 | 1087.5325 | C <sub>53</sub> H <sub>84</sub> O <sub>23</sub> | -1.4 | OA-GlcA-Xyl-Glc-Glc              | OA    | 1087.5247, 731.4323, 569.3837, 523.3785                                         | F12 |
| 163* | 16.71 | [M + HCOO] <sup>-</sup> | 1153.6058 | 1153.6006 | C <sub>55</sub> H <sub>94</sub> O <sub>25</sub> | 4.5  | ginsenoside Rb1                  | PPD   | 1107.5906, 945.5412, 783.4890, 621.4348,459.3786                                | F14 |

|      |       |                         |           |           |                                                 |      |                                  |     |                                                                                            |     |
|------|-------|-------------------------|-----------|-----------|-------------------------------------------------|------|----------------------------------|-----|--------------------------------------------------------------------------------------------|-----|
| 164  | 16.73 | [M – H] <sup>-</sup>    | 1057.5214 | 1056.5141 | C <sub>52</sub> H <sub>82</sub> O <sub>22</sub> | -0.5 | OA-GlcA-Xyl-Glc-Xyl              | OA  | 1057.5214, 785.4214, 613.3727, 569.3837, 497.3655, 455.3441                                | F10 |
| 165  | 16.87 | [M – H] <sup>-</sup>    | 925.4811  | 925.4797  | C <sub>47</sub> H <sub>74</sub> O <sub>18</sub> | 0.9  | stipuleanoside R1                | OA  | 925.4799, 731.4441, 613.3727, 569.3837, 455.3534                                           | F7  |
| 166  | 17.04 | [M – H] <sup>-</sup>    | 1087.5323 | 1087.5325 | C <sub>53</sub> H <sub>84</sub> O <sub>23</sub> | -0.7 | OA-GlcA-Xyl-2Glc                 | OA  | 1087.5247, 731.4323, 551.3765, 455.3534                                                    | F10 |
| 167* | 17.08 | [M – H] <sup>-</sup>    | 955.4905  | 955.4903  | C <sub>48</sub> H <sub>76</sub> O <sub>19</sub> | 0.2  | Chikusetsusaponin V              | OA  | 955.483, 793.4343, 731.4336, 569.3819, 523.3755, 455.3499                                  | F9  |
| 168  | 17.27 | [M – H] <sup>-</sup>    | 1057.5214 | 1057.5219 | C <sub>52</sub> H <sub>82</sub> O <sub>22</sub> | -0.5 | OA-GlcA-Xyl-Glc-Xyl              | OA  | 1057.5214, 701.4296, 523.3785, 455.3534                                                    | F9  |
| 169  | 17.42 | [M – H] <sup>-</sup>    | 1087.533  | 1087.5325 | C <sub>53</sub> H <sub>84</sub> O <sub>23</sub> | 0    | OA-GlcA-Xyl-Glc-Glc              | OA  | 1087.5391, 947.4624, 613.3727, 569.3837, 455.3534                                          | F7  |
| 170  | 17.53 | [M – H] <sup>-</sup>    | 1087.5314 | 1087.5325 | C <sub>53</sub> H <sub>84</sub> O <sub>23</sub> | -1.5 | stipuleanoside R2 or isomer      | OA  | 1087.5247, 731.4323, 551.3765, 455.3534                                                    | F11 |
| 171  | 17.87 | [M – H] <sup>-</sup>    | 1087.5322 | 1087.5325 | C <sub>53</sub> H <sub>84</sub> O <sub>23</sub> | -0.8 | OA-GlcA-Xyl-Glc-Glc              | OA  | 1087.5247, 925.4799, 785.4092, 613.3727, 569.3837, 455.3534                                | F7  |
| 172  | 17.89 | [M – H] <sup>-</sup>    | 955.4909  | 955.4903  | C <sub>48</sub> H <sub>76</sub> O <sub>19</sub> | 0.1  | OA-Glc-Glc-GlcA                  | OA  | 955.4905, 793.4334, 569.3837, 523.3785, 497.3655, 455.3534                                 | F9  |
| 173  | 17.93 | [M – H] <sup>-</sup>    | 793.435   | 793.4374  | C <sub>42</sub> H <sub>66</sub> O <sub>14</sub> | -3.7 | OA-3-GlcA-28-Glc                 | OA  | 793.4334, 631.3806, 569.3942, 455.3534                                                     | F16 |
| 174  | 17.97 | [M + HCOO] <sup>-</sup> | 847.5037  | 801.5000  | C <sub>42</sub> H <sub>74</sub> O <sub>14</sub> | -2.8 | D1-Glc-Glc                       | D1  | 801.4984, 639.4492, 477.3911, 401.3511                                                     | F15 |
| 175  | 17.98 | [M + HCOO] <sup>-</sup> | 1123.5905 | 1077.5845 | C <sub>53</sub> H <sub>90</sub> O <sub>22</sub> | -0.1 | ginsenoside Rc                   | PPD | 1077.5820, 945.5412, 815.4172, 731.4559, 613.3727, 459.3786                                | F13 |
| 176  | 18.04 | [M – H] <sup>-</sup>    | 1057.5214 | 1057.5219 | C <sub>52</sub> H <sub>82</sub> O <sub>22</sub> | -0.5 | OA-GlcA-Xyl-Glc-Xyl              | OA  | 925.4799, 763.4261, 613.3727, 569.3837, 455.3534                                           | F7  |
| 177  | 18.19 | [M – H] <sup>-</sup>    | 925.4752  | 925.4797  | C <sub>47</sub> H <sub>74</sub> O <sub>18</sub> | -5.5 | stipuleanoside R1                | OA  | 925.4799, 763.4261, 613.3727, 569.3837, 523.3785, 455.3441                                 | F8  |
| 178  | 18.19 | [M + HCOO] <sup>-</sup> | 1195.6088 | 1149.6057 | C <sub>56</sub> H <sub>94</sub> O <sub>24</sub> | -2.4 | quinquenoside R1                 | PPD | 1149.6047, 1107.5934, 945.5414, 927.5230, 783.4874, 765.4755, 621.4351, 603.4391, 459.3824 | F13 |
| 179  | 18.31 | [M + HCOO] <sup>-</sup> | 1195.615  | 1149.6057 | C <sub>56</sub> H <sub>94</sub> O <sub>24</sub> | 3.2  | acetyl-ginsenoside Rb1 or isomer | PPD | 1149.6047, 1107.5934, 945.5414, 927.5230, 783.4874, 765.4755, 621.4351, 603.4391, 459.3824 | F13 |
| 180  | 18.56 | [M + HCOO] <sup>-</sup> | 1255.6313 | 1209.6268 | C <sub>58</sub> H <sub>98</sub> O <sub>26</sub> | -1.2 | ginsenoside Ra1                  | PPD | 1209.6230, 1077.5820, 945.5278, 783.5012, 765.4788, 701.4180, 621.4456, 459.3786           | F14 |
| 181  | 18.63 | [M – H] <sup>-</sup>    | 923.4617  | 923.4640  | C <sub>47</sub> H <sub>72</sub> O <sub>18</sub> | -2.5 | OA-GlcA-Glc-Xyl                  | OA  | 923.4617, 793.4334, 631.3806, 613.3727, 569.3837, 523.3785, 455.3441                       | F7  |
| 182  | 18.63 | [M – H] <sup>-</sup>    | 1087.534  | 1087.5325 | C <sub>53</sub> H <sub>84</sub> O <sub>23</sub> | 0.9  | OA-GlcA-Xyl-Glc-Glc              | OA  | 1087.5247, 925.4799, 523.3785                                                              | F11 |



|      |       |                         |           |           |                                                 |      |                                 |        |                                                                                                     |     |
|------|-------|-------------------------|-----------|-----------|-------------------------------------------------|------|---------------------------------|--------|-----------------------------------------------------------------------------------------------------|-----|
| 183  | 18.71 | [M – H] <sup>-</sup>    | 1071.5411 | 1071.5376 | C <sub>53</sub> H <sub>84</sub> O <sub>22</sub> | 3.3  | OA-Rha-Xyl-Xyl-GlcA-ethyl ester | OA     | 1071.5411, 1043.5515, 849.4971, 717.4222, 569.3837, 523.3785, 455.3534                              | F9  |
| 184  | 18.73 | [M + HCOO] <sup>-</sup> | 847.5037  | 801.5000  | C <sub>42</sub> H <sub>74</sub> O <sub>14</sub> | -2.8 | D1-Glc-Glc                      | D1     | 801.4984, 639.4492, 477.3911                                                                        | F15 |
| 185  | 19.01 | [M + HCOO] <sup>-</sup> | 847.5037  | 801.5000  | C <sub>42</sub> H <sub>74</sub> O <sub>14</sub> | -2.8 | D1-Glc-Glc                      | D1     | 801.4984, 639.4492, 477.3911                                                                        | F14 |
| 186  | 19.04 | [M – H] <sup>-</sup>    | 955.4957  | 955.4903  | C <sub>48</sub> H <sub>76</sub> O <sub>19</sub> | 5.1  | OA-GlcA-Glc-Glc                 | OA     | 955.4905, 793.4334, 731.4441, 569.3837, 523.3785, 455.3534                                          | F10 |
| 187  | 19.06 | [M – H] <sup>-</sup>    | 925.4810  | 925.4797  | C <sub>47</sub> H <sub>74</sub> O <sub>18</sub> | 0.8  | stipuleanoside R1               | OA     | 925.4799, 763.4261, 613.3727, 569.3837, 523.3785, 455.3534                                          | F9  |
| 188  | 19.10 | [M – H] <sup>-</sup>    | 925.4808  | 925.4797  | C <sub>47</sub> H <sub>74</sub> O <sub>18</sub> | 0.6  | pseudoginsenoside Rt1 or isomer | OA     | 925.4799, 763.4261, 701.4180, 613.3835, 569.3837, 455.3534                                          | F1  |
| 189  | 19.12 | [M + HCOO] <sup>-</sup> | 887.4998  | 841.4949  | C <sub>44</sub> H <sub>74</sub> O <sub>15</sub> | -1.4 | OT-Glc-Rha-Ac                   | OT     | 841.4975, 799.4845, 653.4276, 491.3651, 415.3284                                                    | F6  |
| 190  | 19.32 | [M – H] <sup>-</sup>    | 925.4803  | 925.4797  | C <sub>47</sub> H <sub>74</sub> O <sub>18</sub> | 0    | pseudoginsenoside Rt1 or isomer | OA     | 925.4799, 763.4261, 701.4180, 613.3835, 569.3837, 523.3785, 455.3534                                | F15 |
| 191  | 19.32 | [M – H] <sup>-</sup>    | 1057.5214 | 1056.5141 | C <sub>52</sub> H <sub>82</sub> O <sub>22</sub> | -0.5 | OA-Xyl-Xyl-GlcA-Glc             | OA     | 1057.5214, 895.4645, 763.4261, 745.4229, 701.4296, 683.4235, 613.3727, 595.3698, 551.3765, 455.3534 | F10 |
| 192* | 19.43 | [M – H] <sup>-</sup>    | 925.4788  | 925.4797  | C <sub>47</sub> H <sub>74</sub> O <sub>18</sub> | -1.5 | chikusetsusaponin IV            | OA     | 925.4799, 763.4261, 701.4296, 613.3727, 569.3837, 455.3441                                          | F7  |
| 193  | 19.64 | [M – H] <sup>-</sup>    | 925.4797  | 925.4797  | C <sub>47</sub> H <sub>74</sub> O <sub>18</sub> | -0.6 | OA-GlcA-Xyl-Glc                 | OA     | 925.4799, 613.3727, 569.3837                                                                        | F15 |
| 194  | 19.69 | [M – H] <sup>-</sup>    | 925.4775  | 925.4797  | C <sub>47</sub> H <sub>74</sub> O <sub>18</sub> | -3   | OA-GlcA-Xyl-Glc                 | OA     | 925.4799, 613.3727, 569.3837, 455.3534, 437.3362                                                    | F6  |
| 195  | 19.71 | [M – H] <sup>-</sup>    | 925.4769  | 925.4797  | C <sub>47</sub> H <sub>74</sub> O <sub>18</sub> | -3.6 | OA-GlcA-Xyl-Glc                 | OA     | 925.4666, 763.4261, 701.4180, 613.3727, 569.3837, 523.3785, 455.3441                                | F8  |
| 196  | 19.86 | [M + HCOO] <sup>-</sup> | 847.5037  | 801.5000  | C <sub>42</sub> H <sub>74</sub> O <sub>14</sub> | -2.8 | D1-Glc-Glc                      | D1     | 801.4984, 639.4492, 477.3911                                                                        | F14 |
| 197  | 19.86 | [M – H] <sup>-</sup>    | 925.4804  | 925.4797  | C <sub>47</sub> H <sub>74</sub> O <sub>18</sub> | 0.1  | pseudoginsenoside Rt1 or isomer | OA     | 925.4799, 763.4261, 701.4296, 613.3727, 569.3837, 455.3534                                          | F2  |
| 198  | 19.97 | [M – H] <sup>-</sup>    | 925.477   | 925.4797  | C <sub>47</sub> H <sub>74</sub> O <sub>18</sub> | -3.5 | OA-GlcA-Xyl-Glc                 | OA     | 925.4666, 763.4141, 613.3619, 569.3733, 455.3441                                                    | F7  |
| 199  | 20.21 | [M – H] <sup>-</sup>    | 925.4793  | 925.4797  | C <sub>47</sub> H <sub>74</sub> O <sub>18</sub> | -1   | OA-GlcA-Xyl-Glc                 | OA     | 925.4799, 613.3727, 569.3837                                                                        | F2  |
| 200* | 20.34 | [M – H] <sup>-</sup>    | 925.4797  | 925.4797  | C <sub>47</sub> H <sub>74</sub> O <sub>18</sub> | -0.5 | chikusetsusaponin Ib            | OA     | 925.4799, 613.3727, 569.3837                                                                        | F11 |
| 201  | 21.04 | [M – H] <sup>-</sup>    | 939.4944  | 939.4953  | C <sub>48</sub> H <sub>76</sub> O <sub>18</sub> | -1.6 | pseudoginsenoside methyl ester  | Rt1 OA | 939.4963, 777.4427, 613.3745, 569.3848, 523.3790, 455.3525                                          | F8  |
| 202  | 21.29 | [M – H] <sup>-</sup>    | 793.4374  | 793.4374  | C <sub>42</sub> H <sub>66</sub> O <sub>14</sub> | -0.7 | OA-3-GlcA-28-Glc                | OA     | 793.4334, 631.3806, 569.3837, 455.3534                                                              | F1  |

|      |       |                         |           |           |                                                 |      |                                  |           |                                                                                   |     |
|------|-------|-------------------------|-----------|-----------|-------------------------------------------------|------|----------------------------------|-----------|-----------------------------------------------------------------------------------|-----|
| 203  | 21.32 | [M + HCOO] <sup>-</sup> | 1195.6105 | 1149.6057 | C <sub>56</sub> H <sub>94</sub> O <sub>24</sub> | -1   | acetyl-ginsenoside Rb1 or isomer | PPD       | 1149.6047,<br>1107.5934,945.5414,927.5230,783.4874,76<br>5.4755,621.4351,459.3860 | F13 |
| 204  | 21.38 | [M – H] <sup>-</sup>    | 793.4362  | 793.4374  | C <sub>42</sub> H <sub>66</sub> O <sub>14</sub> | -2.3 | OA-3-GlcA-28-Glc                 | OA        | 793.4334, 631.3806,613.3727,455.3534                                              | F16 |
| 205  | 21.54 | [M – H] <sup>-</sup>    | 793.4373  | 793.4374  | C <sub>42</sub> H <sub>66</sub> O <sub>14</sub> | -0.8 | OA-3-GlcA-28-Glc                 | OA        | 793.4334, 631.3806, 569.3837, 455.3534                                            | F15 |
| 206  | 21.60 | [M – H] <sup>-</sup>    | 793.4334  | 793.4374  | C <sub>42</sub> H <sub>66</sub> O <sub>14</sub> | -5   | OA-3-GlcA-28-Glc                 | OA        | 793.4334, 631.3806, 569.3837, 455.3534                                            | F4  |
| 207  | 21.69 | [M – H] <sup>-</sup>    | 793.4366  | 793.4374  | C <sub>42</sub> H <sub>66</sub> O <sub>14</sub> | -1.7 | OA-3-GlcA-28-Glc                 | OA        | 793.4334, 631.3806, 569.3837, 455.3534                                            | F16 |
| 208* | 21.72 | [M – H] <sup>-</sup>    | 793.4367  | 793.4374  | C <sub>42</sub> H <sub>66</sub> O <sub>14</sub> | -1.7 | Chikusetsusaponin IVa            | OA        | 793.4334, 631.3806, 569.3837,455.3534                                             | F6  |
| 209  | 21.81 | [M + HCOO] <sup>-</sup> | 975.5539  | 929.5110  | C <sub>47</sub> H <sub>78</sub> O <sub>18</sub> | 0.5  | OA-Xyl-Glc-Glc                   | OA        | 929.5495, 701.4296, 605.4493, 455.3628                                            | F9  |
| 210  | 21.92 | [M + HCOO] <sup>-</sup> | 1255.6308 | 1209.6268 | C <sub>58</sub> H <sub>98</sub> O <sub>26</sub> | -1.6 | PPT-Glc-Glc-Rha-Xyl-Xyl          | PPT       | 1209.6230, 1077.5820,<br>945.5278,799.4845,637.4300, 475.3801                     | F14 |
| 211  | 21.98 | [M – H] <sup>-</sup>    | 925.4818  | 925.4797  | C <sub>47</sub> H <sub>74</sub> O <sub>18</sub> | 1.6  | pjs-2                            | OA        | 925.4799, 763.4261, 701.4296, 613.3835,<br>569.3837, 455.3534                     | F8  |
| 212* | 22.15 | [M – H] <sup>-</sup>    | 793.4334  | 793.4374  | C <sub>42</sub> H <sub>66</sub> O <sub>14</sub> | -5   | Cynarasaponin C                  | UA        | 793.4334, 631.3806, 569.3837, 497.3655,<br>455.3534                               | F2  |
| 213  | 22.34 | [M – H] <sup>-</sup>    | 793.4369  | 793.4374  | C <sub>42</sub> H <sub>66</sub> O <sub>14</sub> | -1.3 | OA-3-GlcA-28-Glc                 | OA        | 793.4334, 631.3806, 569.3837, 455.3534                                            | F11 |
| 214  | 22.87 | [M – H] <sup>-</sup>    | 793.4373  | 793.4374  | C <sub>42</sub> H <sub>66</sub> O <sub>14</sub> | -0.8 | OA-3-GlcA-28-Glc                 | OA        | 793.4334, 631.3806, 569.3837, 455.3534                                            | F14 |
| 215* | 23.36 | [M + HCOO] <sup>-</sup> | 991.5481  | 945.5423  | C <sub>48</sub> H <sub>82</sub> O <sub>18</sub> | -0.3 | ginsenoside Rd                   | PPD       | 945.5412, 783.4890, 621.4456, 459.3879                                            | F10 |
| 216  | 23.58 | [M – H] <sup>-</sup>    | 1297.6431 | 1209.6268 | C <sub>58</sub> H <sub>98</sub> O <sub>26</sub> | 0.2  | PPD-Glc-Glc-Glc-Xyl-Xyl-mal      | PPD       | 1209.6332,1077.5776,945.5641,783.4857,7<br>65.4634,621.4434,459.3766              | F14 |
| 217  | 23.72 | [M + HCOO] <sup>-</sup> | 985.5002  | 939.4953  | C <sub>48</sub> H <sub>76</sub> O <sub>18</sub> | -0.4 | OA-GlcA-Glc-Xyl                  | OA        | 939.4949, 789.4407, 771.4468, 609.3777,<br>455.3534                               | F9  |
| 218  | 24.05 | [M + HCOO] <sup>-</sup> | 991.5479  | 945.5423  | C <sub>48</sub> H <sub>82</sub> O <sub>18</sub> | -0.5 | ginsenoside Rd6                  | PPD       | 945.5412, 783.4890, 765.4788,621.4456,<br>603.4202, 459.3879                      | F11 |
| 219  | 24.76 | [M + HCOO] <sup>-</sup> | 985.5021  | 939.4953  | C <sub>48</sub> H <sub>76</sub> O <sub>18</sub> | 0.8  | pseudoginsenoside methyl ester   | Rt1<br>OA | 939.4944,789.4414,609.3785,455.3515                                               | F11 |
| 220  | 25.18 | [M + HCOO] <sup>-</sup> | 985.5021  | 939.4953  | C <sub>48</sub> H <sub>76</sub> O <sub>18</sub> | 0.8  | pseudoginsenoside methyl ester   | Rt1<br>OA | 939.4944,789.4414,609.3785,455.3515                                               | F12 |
| 221  | 25.29 | [M + HCOO] <sup>-</sup> | 843.4750  | 797.4687  | C <sub>42</sub> H <sub>70</sub> O <sub>14</sub> | 0.3  | B2-Glc-Glc                       | B2        | 797.4731, 635.4139, 473.3637                                                      | F14 |
| 222  | 25.29 | [M + HCOO] <sup>-</sup> | 991.5488  | 945.5423  | C <sub>48</sub> H <sub>82</sub> O <sub>18</sub> | 0.5  | gypenoside XVII or isomer        | PPD       | 945.5412, 783.4890, 621.4456, 459.3879                                            | F10 |
| 223  | 25.33 | [M – H] <sup>-</sup>    | 923.4617  | 923.4640  | C <sub>47</sub> H <sub>72</sub> O <sub>18</sub> | -2.5 | (OA-2H)-GlcA-Xyl-Glc             | OA-2H     | 761.4125, 611.3628, 567.3744, 453.3336                                            | F8  |
| 224  | 25.38 | [M + HCOO] <sup>-</sup> | 991.5467  | 945.5423  | C <sub>48</sub> H <sub>82</sub> O <sub>18</sub> | -1.7 | gypenoside XVII or isomer        | PPD       | 945.5412, 783.4890, 621.4456, 459.3879                                            | F15 |

|     |       |                         |           |           |                                                 |      |                                              |     |                                                                     |     |
|-----|-------|-------------------------|-----------|-----------|-------------------------------------------------|------|----------------------------------------------|-----|---------------------------------------------------------------------|-----|
| 225 | 25.38 | [M + HCOO] <sup>-</sup> | 1195.6105 | 1149.6057 | C <sub>56</sub> H <sub>94</sub> O <sub>24</sub> | -1   | acetyl-ginsenoside B1                        | PPD | 1149.6047,1107.5934,945.5414,783.4874,765.4755,621.4351,459.3860    | F13 |
| 226 | 25.50 | [M + HCOO] <sup>-</sup> | 1117.5536 | 1117.5067 | C <sub>53</sub> H <sub>82</sub> O <sub>25</sub> | 2.8  | achyranthoside D                             | OA  | 1041.5070,955.5040,793.4334,731.4441,613.3727, 455.3534             | F9  |
| 227 | 25.52 | [M + HCOO] <sup>-</sup> | 889.5155  | 843.5106  | C <sub>44</sub> H <sub>76</sub> O <sub>15</sub> | -0.7 | D1-Glc-Glc-Ac                                | D1  | 843.5128,801.4984,639.4382, 477.4007                                | F14 |
| 228 | 25.62 | [M + HCOO] <sup>-</sup> | 1033.5597 | 987.5529  | C <sub>50</sub> H <sub>84</sub> O <sub>19</sub> | 1.4  | PPD-Glc-Glc-Ac                               | PPD | 987.5576,945.5412,783.4890,621.4348,459.3879                        | F8  |
| 229 | 25.69 | [M + HCOO] <sup>-</sup> | 1123.5908 | 1077.5845 | C <sub>53</sub> H <sub>90</sub> O <sub>22</sub> | 0.7  | OA-GlcA-Xyl-Glc-Xyl                          | OA  | 1077.5820, 945.5412, 759.4256, 613.3727, 455.3534                   | F13 |
| 230 | 25.72 | [M + HCOO] <sup>-</sup> | 889.5155  | 843.5106  | C <sub>44</sub> H <sub>76</sub> O <sub>15</sub> | -0.7 | D1-Glc-Glc-Ac                                | D1  | 843.5255,801.4984,639.4382, 477.4007                                | F14 |
| 231 | 25.74 | [M - H] <sup>-</sup>    | 1107.5906 | 1107.5951 | C <sub>54</sub> H <sub>92</sub> O <sub>23</sub> | 0.2  | ginsenoside B1                               | PPD | 1107.5906, 945.5546, 783.4767,621.4239,459.3879                     | F13 |
| 232 | 25.75 | [M + HCOO] <sup>-</sup> | 1221.6252 | 1175.6213 | C <sub>58</sub> H <sub>96</sub> O <sub>24</sub> | -1.7 | ginsenoside Ra6                              | PPD | 1175.6168,1107.5906,1089.5850, 945.5546, 783.4767,621.4239,459.3879 | F13 |
| 233 | 25.78 | [M + HCOO] <sup>-</sup> | 991.5485  | 945.5423  | C <sub>48</sub> H <sub>82</sub> O <sub>18</sub> | 0.2  | gypenoside XVII or isomer                    | PPD | 945.5412, 783.4890, 621.4456, 459.3879                              | F12 |
| 234 | 25.81 | [M - H] <sup>-</sup>    | 939.4929  | 939.4953  | C <sub>48</sub> H <sub>76</sub> O <sub>18</sub> | -3.2 | pseudoginsenoside methyl ester Rt1           | OA  | 939.4963,807.4527,627.3892,609.3783,569.3848,523.3790,455.3525      | F9  |
| 235 | 25.83 | [M + HCOO] <sup>-</sup> | 985.501   | 939.4953  | C <sub>48</sub> H <sub>76</sub> O <sub>18</sub> | -0.4 | pseudoginsenoside methyl ester or isomer Rt1 | OA  | 807.4561, 627.3928, 537.3571, 455.3534                              | F7  |
| 236 | 25.84 | [M + HCOO] <sup>-</sup> | 991.5413  | 945.5423  | C <sub>48</sub> H <sub>82</sub> O <sub>18</sub> | -6.6 | PPD-Glc-Glc-Glc                              | PPD | 945.5412, 783.4890, 621.4456,459.3879                               | F15 |
| 237 | 25.86 | [M + HCOO] <sup>-</sup> | 853.4603  | 807.4531  | C <sub>43</sub> H <sub>68</sub> O <sub>14</sub> | 1.4  | chikusetsusaponin methyl ester or isomer IVa | OA  | 807.4561, 609.3777, 537.3571, 455.3534                              | F8  |
| 238 | 25.89 | [M + HCOO] <sup>-</sup> | 853.4583  | 807.4531  | C <sub>43</sub> H <sub>68</sub> O <sub>14</sub> | -0.9 | chikusetsusaponin methyl ester or isomer IVa | OA  | 807.4436,627.3928,609.3777,537.3571,455.3534                        | F19 |
| 239 | 25.92 | [M + HCOO] <sup>-</sup> | 853.4565  | 807.4531  | C <sub>43</sub> H <sub>68</sub> O <sub>14</sub> | 1.4  | spinasaponinA methyl ester or isomer         | OA  | 807.4527,645.4013,627.3901,609.3751,455.3515                        | F4  |
| 240 | 25.94 | [M + HCOO] <sup>-</sup> | 1093.5796 | 1047.574  | C <sub>52</sub> H <sub>88</sub> O <sub>21</sub> | 1.7  | OA-Rha-Rha-Xyl-Xyl                           | OA  | 1047.5758, 915.5298, 621.4456, 569.3942, 455.3441                   | F13 |
| 241 | 25.97 | [M + HCOO] <sup>-</sup> | 843.4735  | 797.4687  | C <sub>42</sub> H <sub>70</sub> O <sub>14</sub> | -1.5 | B2-Glc-Glc                                   | B2  | 797.4731, 635.4139, 473.3637                                        | F14 |
| 242 | 26.01 | [M + HCOO] <sup>-</sup> | 975.5539  | 929.5474  | C <sub>48</sub> H <sub>82</sub> O <sub>17</sub> | 0.5  | OA-Xyl-Glc-Glc                               | OA  | 929.5495, 767.4977, 605.4493, 455.3534                              | F9  |
| 243 | 26.02 | [M + HCOO] <sup>-</sup> | 827.4825  | 781.4738  | C <sub>42</sub> H <sub>70</sub> O <sub>13</sub> | 3.9  | ginsenoside Rg8<br>orginsenoside Rh15        | B1  | 781.4734, 619.4333, 457.3591                                        | F13 |
| 244 | 26.09 | [M + HCOO] <sup>-</sup> | 1033.5597 | 1003.5583 | C <sub>51</sub> H <sub>86</sub> O <sub>21</sub> | 1.4  | pseudoginsenoside Rc1                        | PPD | 987.5576,945.5412, 783.4890, 765.4788, 621.4348, 523.3785, 459.3879 | F9  |

|     |       |                         |          |          |                                                 |      |                                                             |     |                                                            |     |
|-----|-------|-------------------------|----------|----------|-------------------------------------------------|------|-------------------------------------------------------------|-----|------------------------------------------------------------|-----|
| 245 | 26.15 | [M – H] <sup>-</sup>    | 937.4748 | 937.4797 | C <sub>48</sub> H <sub>74</sub> O <sub>18</sub> | -5.2 | OA-GlcA-Glc-Rha                                             | OA  | 937.4748, 793.4334, 631.3696, 613.3835, 569.3837, 455.3534 | F5  |
| 246 | 26.32 | [M – H] <sup>-</sup>    | 953.4803 | 953.4746 | C <sub>48</sub> H <sub>74</sub> O <sub>19</sub> | 6    | OA-Rha-Glc-GlcA                                             | OA  | 777.4379, 597.3746, 537.3571, 455.3534                     | F7  |
| 247 | 26.32 | [M + HCOO] <sup>-</sup> | 985.5000 | 939.4953 | C <sub>48</sub> H <sub>76</sub> O <sub>18</sub> | -1.4 | pseudoginsenoside methyl ester Rt1                          | OA  | 777.4379, 597.3746, 537.3571, 455.3534                     | F7  |
| 248 | 26.34 | [M + HCOO] <sup>-</sup> | 823.4470 | 777.4425 | C <sub>42</sub> H <sub>66</sub> O <sub>13</sub> | -6   | OA-GlcA-Rha                                                 | OA  | 777.4014, 631.3806, 569.3837, 455.3534                     | F6  |
| 249 | 26.37 | [M + HCOO] <sup>-</sup> | 823.4468 | 777.4425 | C <sub>42</sub> H <sub>66</sub> O <sub>13</sub> | -2.2 | 28-desglucosylchikusetsusaponin IV methyl ester or isomer   | OA  | 777.4405, 739.4195, 455.3510                               | F17 |
| 250 | 26.43 | [M + HCOO] <sup>-</sup> | 675.3762 | 631.3846 | C <sub>36</sub> H <sub>56</sub> O <sub>9</sub>  | 2.7  | OA-GlcA                                                     | OA  | 631.3727, 613.3727, 455.3534                               | F9  |
| 251 | 26.44 | [M + HCOO] <sup>-</sup> | 999.5194 | 953.511  | C <sub>49</sub> H <sub>78</sub> O <sub>18</sub> | 2.4  | pseudoginsenoside ethyl ester or isomer Rt1                 | OA  | 794.4547, 641.4053, 497.3655, 455.3628                     | F1  |
| 252 | 26.45 | [M + HCOO] <sup>-</sup> | 823.4425 | 777.4425 | C <sub>42</sub> H <sub>66</sub> O <sub>13</sub> | -6.7 | bipinoside A                                                | OA  | 777.4347, 731.4647, 609.3859, 537.3651, 455.3422           | F11 |
| 253 | 26.56 | [M + HCOO] <sup>-</sup> | 829.4936 | 829.4949 | C <sub>43</sub> H <sub>74</sub> O <sub>15</sub> | -1.6 | ginsenoside Rg3                                             | PPD | 783.4890, 621.4348, 459.3786                               | F14 |
| 254 | 26.57 | [M + HCOO] <sup>-</sup> | 867.4760 | 821.4687 | C <sub>44</sub> H <sub>70</sub> O <sub>14</sub> | 1.4  | OA-GlcA-Glc-ethyl ester                                     | OA  | 821.4638, 659.4132, 537.3571, 455.3534                     | F1  |
| 255 | 26.63 | [M – H] <sup>-</sup>    | 835.4532 | 835.448  | C <sub>44</sub> H <sub>68</sub> O <sub>15</sub> | 6.2  | OA-GlcA-methy-Rha-Ac                                        | OA  | 835.4532, 793.4457, 645.4040, 631.3915, 569.3837, 455.3441 | F5  |
| 256 | 26.65 | [M + HCOO] <sup>-</sup> | 867.4737 | 821.4687 | C <sub>44</sub> H <sub>70</sub> O <sub>14</sub> | -1.2 | chikusetsusaponin IV a ethyl ester or isomer                | OA  | 821.4638, 793.4334, 613.3835, 455.3534                     | F8  |
| 257 | 26.65 | [M – H] <sup>-</sup>    | 645.4004 | 645.4003 | C <sub>37</sub> H <sub>58</sub> O <sub>9</sub>  | -0.7 | 28-desglucosylchikusetsusaponin IV a methyl ester           | OA  | 645.3995, 613.3746, 455.3521                               | F7  |
| 258 | 26.72 | [M + HCOO] <sup>-</sup> | 853.4568 | 807.4531 | C <sub>43</sub> H <sub>68</sub> O <sub>14</sub> | -2.7 | spinasaponinA methyl ester or isomer                        | OA  | 645.4040, 455.3441                                         | F5  |
| 259 | 26.73 | [M + HCOO] <sup>-</sup> | 811.4815 | 765.4789 | C <sub>42</sub> H <sub>70</sub> O <sub>12</sub> | -3.6 | ginsenoside F4 or isomer                                    | C2  | 765.4788, 619.4225, 601.4159, 457.3685                     | F10 |
| 260 | 26.85 | [M + HCOO] <sup>-</sup> | 867.4760 | 821.4687 | C <sub>44</sub> H <sub>70</sub> O <sub>14</sub> | 1.4  | chikusetsusaponin IV a ethyl ester or isomer                | OA  | 821.4638, 793.4379, 613.3958, 455.3534                     | F12 |
| 261 | 26.88 | [M – H] <sup>-</sup>    | 645.3993 | 645.4003 | C <sub>37</sub> H <sub>58</sub> O <sub>9</sub>  | -2.3 | 28-desglucosylchikusetsusaponin IV a methyl ester or isomer | OA  | 645.4040, 455.3534                                         | F13 |
| 262 | 27.03 | [M – H] <sup>-</sup>    | 763.4161 | 762.4190 | C <sub>41</sub> H <sub>64</sub> O <sub>13</sub> | -1   | 28-desglucosylchikusetsusaponin IV                          | OA  | 763.4261, 613.3727, 569.3942, 455.3441                     | F14 |

|      |       |                         |           |           |                                                  |      |                                                 |      |                                                                         |     |
|------|-------|-------------------------|-----------|-----------|--------------------------------------------------|------|-------------------------------------------------|------|-------------------------------------------------------------------------|-----|
| 263  | 27.04 | [M + HCOO] <sup>-</sup> | 811.4815  | 765.4789  | C <sub>42</sub> H <sub>70</sub> O <sub>12</sub>  | -3.6 | ginsenoside F4 or C2-Glc-Rha                    | C2   | 765.4788, 619.4225, 601.4159, 457.3685                                  | F10 |
| 264  | 27.11 | [M + HCOO] <sup>-</sup> | 837.4644  | 791.4582  | C <sub>43</sub> H <sub>68</sub> O <sub>13</sub>  | 0.3  | OA-GlcA-Rha-methyl ester                        | OA   | 791.4567,777.4073,631.3806,613.3727,569.3837,455.3518                   | F9  |
| 265  | 27.17 | [M + HCOO] <sup>-</sup> | 837.4613  | 791.4582  | C <sub>43</sub> H <sub>68</sub> O <sub>13</sub>  | -6   | OA-GlcA-Rha-methyl ester                        | OA   | 791.4542, 777.4014, 631.3696, 537.3571, 455.3534                        | F16 |
| 266  | 27.19 | [M – H] <sup>-</sup>    | 777.4014  | 777.4061  | C <sub>41</sub> H <sub>62</sub> O <sub>14</sub>  | -6   | OA-GlcA-Xyl                                     | OA   | 777.4014, 645.3596, 537.3571, 455.3534                                  | F5  |
| 267  | 27.20 | [M + HCOO] <sup>-</sup> | 679.4047  | 633.4003  | C <sub>36</sub> H <sub>58</sub> O <sub>9</sub>   | -2.4 | maslinic acid 28-O-β-d-glucopyranoside          | A1   | 633.6429,471.3516,455.3628,411.3244                                     | F3  |
| 268  | 27.23 | [M + HCOO] <sup>-</sup> | 811.4856  | 765.4789  | C <sub>42</sub> H <sub>70</sub> O <sub>12</sub>  | 0.8  | B3-Glc-Rha                                      | B3   | 765.4788, 619.4225,457.3685                                             | F14 |
| 269  | 27.31 | [M – H] <sup>-</sup>    | 1215.6667 | 1215.6679 | C <sub>65</sub> H <sub>100</sub> O <sub>21</sub> | -1.5 | polyacetyleneginsenoside Ro                     | OA   | 1107.5760, 925.4799, 763.4382, 613.3619, 455.3534                       | F12 |
| 270  | 27.36 | [M + HCOO] <sup>-</sup> | 837.5613  | 791.4582  | C <sub>43</sub> H <sub>68</sub> O <sub>13</sub>  | -2.7 | 28-desglucosylchikusetsusaponin IV ethyl ester  | OA   | 791.4542,763.4241,731.4323,631.3696,613.3727,569.3837,537.3672,455.3534 | F12 |
| 271  | 27.38 | [M – H] <sup>-</sup>    | 793.4360  | 793.4374  | C <sub>42</sub> H <sub>66</sub> O <sub>14</sub>  | -2.5 | OA-3-GlcA-Glc                                   | OA   | 793.4334, 701.4296, 613.3727, 569.3837, 455.3534                        | F9  |
| 272  | 27.41 | [M + HCOO] <sup>-</sup> | 825.4612  | 779.4582  | C <sub>42</sub> H <sub>68</sub> O <sub>13</sub>  | -2.9 | (OA+O)-GlcA-Rha                                 | OA+O | 779.4117,631.3915,471.3422, 455.3534                                    | F12 |
| 273  | 27.45 | [M – H] <sup>-</sup>    | 793.4357  | 793.4374  | C <sub>42</sub> H <sub>66</sub> O <sub>14</sub>  | -2.9 | chikusetsusaponin II or OA-3-GlcA-Glc           | OA   | 793.4334, 613.3727, 569.3837, 455.3534                                  | F16 |
| 274  | 27.52 | [M – H] <sup>-</sup>    | 895.4645  | 895.4691  | C <sub>46</sub> H <sub>72</sub> O <sub>17</sub>  | -5.1 | OA-Xyl-Xyl-GlcA                                 | OA   | 895.4645, 701.4296, 569.3837, 523.3785, 455.3534                        | F9  |
| 275* | 27.53 | [M – H] <sup>-</sup>    | 793.4359  | 793.4374  | C <sub>42</sub> H <sub>66</sub> O <sub>14</sub>  | -2.6 | zingibroside R1                                 | OA   | 793.4334, 613.3727, 569.3837, 455.3534                                  | F11 |
| 276  | 27.54 | [M + HCOO] <sup>-</sup> | 991.5472  | 945.5423  | C <sub>48</sub> H <sub>82</sub> O <sub>18</sub>  | -1.2 | gypenoside XVII or isomer                       | PPD  | 945.5412, 783.4890, 621.4456, 459.3879                                  | F14 |
| 277  | 27.57 | [M – H] <sup>-</sup>    | 659.4146  | 659.4159  | C <sub>38</sub> H <sub>60</sub> O <sub>9</sub>   | -2.8 | 28-desglucosylchikusetsusaponin IVa ethyl ester | OA   | 659.4244, 631.4025,613.3727,569.3942, 455.3534                          | F16 |
| 278  | 27.63 | [M – H] <sup>-</sup>    | 793.4359  | 793.4374  | C <sub>42</sub> H <sub>66</sub> O <sub>14</sub>  | -2.6 | chikusetsusaponin II or OA-3-GlcA-Glc           | OA   | 793.4334, 613.3727, 569.3837, 455.3534                                  | F12 |
| 279  | 27.73 | [M – H] <sup>-</sup>    | 961.5353  | 961.5372  | C <sub>48</sub> H <sub>82</sub> O <sub>19</sub>  | -2.3 | chikusetsusaponin LM4                           | PPD  | 783.4871, 621.4345, 459.3827                                            | F3  |
| 280  | 27.74 | [M + HCOO] <sup>-</sup> | 961.5339  | 915.5317  | C <sub>47</sub> H <sub>80</sub> O <sub>17</sub>  | -3.4 | PPD-Glc-Glc-Xyl                                 | PPD  | 915.5298, 783.4890, 621.4348, 459.3879                                  | F14 |
| 281  | 27.87 | [M + HCOO] <sup>-</sup> | 961.5339  | 915.5317  | C <sub>47</sub> H <sub>80</sub> O <sub>17</sub>  | -3.4 | PPD-Glc-Glc-Xyl                                 | PPD  | 915.5298, 783.4890, 621.4348, 459.3879                                  | F14 |
| 282  | 27.88 | [M – H] <sup>-</sup>    | 763.4248  | 763.4269  | C <sub>41</sub> H <sub>64</sub> O <sub>13</sub>  | -3.5 | OA-GlcA-Xyl                                     | OA   | 763.4261, 613.3727, 569.3837, 455.3534                                  | F8  |
| 283  | 27.93 | [M – H] <sup>-</sup>    | 777.4136  | 777.4061  | C <sub>41</sub> H <sub>62</sub> O <sub>14</sub>  | 9.6  | 28-desglucosylchikusetsusa                      | OA   | 777.4014, 763.4261,613.3727, 569.3837, 455.3534                         | F5  |

|      |       |                         |          |          |                                                 |      |                                                            |      |                                                           |     |
|------|-------|-------------------------|----------|----------|-------------------------------------------------|------|------------------------------------------------------------|------|-----------------------------------------------------------|-----|
|      |       |                         |          |          |                                                 |      | ponin IV methyl ester or isomer                            |      |                                                           |     |
| 284  | 28.04 | [M + HCOO] <sup>-</sup> | 827.4825 | 781.4738 | C <sub>42</sub> H <sub>70</sub> O <sub>13</sub> | 3.9  | B3-GlcGlc                                                  | B3   | 781.4734, 619.4333, 457.3685,373.2753                     | F14 |
| 285  | 28.05 | [M - H] <sup>-</sup>    | 777.4014 | 777.4061 | C <sub>41</sub> H <sub>62</sub> O <sub>14</sub> | -6   | 28-desglucosylchikusetsusa ponin IV methyl ester or isomer | OA   | 777.4014,763.4261,631.3806,613.3835,569.3837, 455.3534    | F4  |
| 286  | 28.08 | [M - H] <sup>-</sup>    | 763.4267 | 763.4269 | C <sub>41</sub> H <sub>64</sub> O <sub>13</sub> | -1   | OA-GlcA-Xyl                                                | OA   | 763.4261, 613.3727, 569.3837, 455.3534                    | F6  |
| 287  | 28.16 | [M + HCOO] <sup>-</sup> | 829.4948 | 783.4895 | C <sub>42</sub> H <sub>72</sub> O <sub>13</sub> | -0.8 | ginsenoside F2                                             | PPD  | 783.4877, 621.4361, 459.3828,375.2901                     | F15 |
| 288  | 28.27 | [M - H] <sup>-</sup>    | 763.4262 | 763.4269 | C <sub>41</sub> H <sub>64</sub> O <sub>13</sub> | -1.6 | OA-GlcA-Xyl                                                | OA   | 763.4261, 613.3727, 569.3837, 455.3534                    | F12 |
| 289  | 28.30 | [M + HCOO] <sup>-</sup> | 829.4953 | 783.4895 | C <sub>42</sub> H <sub>72</sub> O <sub>13</sub> | -0.3 | PPD-Glc-Glc                                                | PPD  | 783.4890, 621.4456, 459.3786                              | F11 |
| 290  | 28.38 | [M - H] <sup>-</sup>    | 779.4239 | 779.4218 | C <sub>41</sub> H <sub>64</sub> O <sub>14</sub> | 2.7  | OA-GlcA-Xyl                                                | OA   | 779.4239, 647.3802, 629.3741, 585.3748, 523.3785,455.3628 | F5  |
| 291  | 28.39 | [M + HCOO] <sup>-</sup> | 829.4945 | 783.4895 | C <sub>42</sub> H <sub>72</sub> O <sub>13</sub> | -1.2 | ginsenoside F2 or isomer                                   | PPD  | 783.4877, 621.4361, 459.3828,375.2901                     | F15 |
| 292  | 28.43 | [M - H] <sup>-</sup>    | 763.4263 | 763.4269 | C <sub>41</sub> H <sub>64</sub> O <sub>13</sub> | -1.5 | OA-GlcA-Xyl                                                | OA   | 763.4261, 613.3727, 569.3837, 497.3655, 455.3534          | F7  |
| 293  | 28.44 | [M + HCOO] <sup>-</sup> | 829.4951 | 783.4895 | C <sub>42</sub> H <sub>72</sub> O <sub>13</sub> | -0.5 | ginsenoside Rg3 or isomer                                  | PPD  | 783.4878, 621.4361, 459.3828,375.2902                     | F14 |
| 294  | 28.62 | [M + HCOO] <sup>-</sup> | 853.4962 | 807.4895 | C <sub>44</sub> H <sub>72</sub> O <sub>13</sub> | 0.9  | acetyl-ginsenoside F4                                      | C2   | 807.4933,765.4908, 619.4116, 457.3778                     | F9  |
| 295  | 28.67 | [M + HCOO] <sup>-</sup> | 829.4951 | 783.4895 | C <sub>42</sub> H <sub>72</sub> O <sub>13</sub> | -0.5 | ginsenoside Rg3 or isomer                                  | PPD  | 783.4878, 621.4361, 459.3828,375.2902                     | F14 |
| 296  | 28.67 | [M + HCOO] <sup>-</sup> | 693.3915 | 647.3795 | C <sub>36</sub> H <sub>56</sub> O <sub>10</sub> | 1.1  | (OA+O)-GlcA                                                | OA+O | 647.3802,471.3611,455.3441                                | F8  |
| 297  | 28.68 | [M - H] <sup>-</sup>    | 749.4457 | 749.4476 | C <sub>41</sub> H <sub>66</sub> O <sub>12</sub> | -3.3 | pjs-4                                                      | OA   | 749.4462, 647.3802, 599.3936, 439.3568                    | F16 |
| 298  | 28.87 | [M - H] <sup>-</sup>    | 781.4734 | 781.4738 | C <sub>42</sub> H <sub>70</sub> O <sub>13</sub> | -0.5 | OA-GlcA-Rha                                                | OA   | 617.2941,569.3733,439.9428                                | F5  |
| 299  | 29.01 | [M - H] <sup>-</sup>    | 631.3848 | 631.3846 | C <sub>36</sub> H <sub>56</sub> O <sub>9</sub>  | -0.6 | OA-GlcA                                                    | OA   | 631.3806, 555.3622, 455.3534                              | F4  |
| 300* | 29.09 | [M - H] <sup>-</sup>    | 631.3841 | 631.3846 | C <sub>36</sub> H <sub>56</sub> O <sub>9</sub>  | -6.3 | calenduloside E                                            | OA   | 631.3806,455.3534                                         | F16 |
| 301  | 29.57 | [M + HCOO] <sup>-</sup> | 663.409  | 617.4053 | C <sub>36</sub> H <sub>58</sub> O <sub>8</sub>  | -3.6 | oleanolic acid 28-O-β-D-glucopyranose                      | OA   | 617.4135,581.2194,455.3534,407.3310                       | F9  |
| 302  | 29.65 | [M - H] <sup>-</sup>    | 631.3806 | 617.4053 | C <sub>36</sub> H <sub>58</sub> O <sub>8</sub>  | 0.9  | OA-GlcA                                                    | OA   | 631.3806,613.3619,455.3534                                | F5  |
| 303  | 29.65 | [M + HCOO] <sup>-</sup> | 871.5041 | 825.5000 | C <sub>44</sub> H <sub>74</sub> O <sub>14</sub> | -1.3 | acetyl-ginsenoside Rg3                                     | PPD  | 825.4989,783.4890,621.4348,603.4310,459.3879              | F14 |
| 304  | 30.16 | [M - H] <sup>-</sup>    | 823.4494 | 777.4425 | C <sub>42</sub> H <sub>66</sub> O <sub>13</sub> | 1.1  | 28-desglucosylchikusetsusa ponin IV methyl ester or isomer | OA   | 777.4501,763.4305,537.3607,455.3628                       | F6  |

|      |       |                         |          |          |                                                 |      |                    |     |    |    |                                        |     |
|------|-------|-------------------------|----------|----------|-------------------------------------------------|------|--------------------|-----|----|----|----------------------------------------|-----|
| 305  | 30.96 | [M + HCOO] <sup>-</sup> | 811.4856 | 765.4789 | C <sub>42</sub> H <sub>70</sub> O <sub>12</sub> | -3.6 | ginsenoside isomer | Rg5 | or | C2 | 765.4788, 603.4202, 457.0043, 376.9831 | F14 |
| 306  | 31.21 | [M + HCOO] <sup>-</sup> | 811.4856 | 765.4789 | C <sub>42</sub> H <sub>70</sub> O <sub>12</sub> | -3.6 | ginsenoside isomer | Rg5 | or | C2 | 765.4788, 603.4202, 457.0043, 376.9916 | F14 |
| 307* | 34.77 | [M - H] <sup>-</sup>    | 455.3529 | 455.3525 | C <sub>30</sub> H <sub>48</sub> O <sub>3</sub>  | -0.4 | Oleanolic acid     |     |    | OA | 455.3534                               | F8  |

\* Characterized by compared with reference compounds.

The structures of sapogenins in the table are as follows:

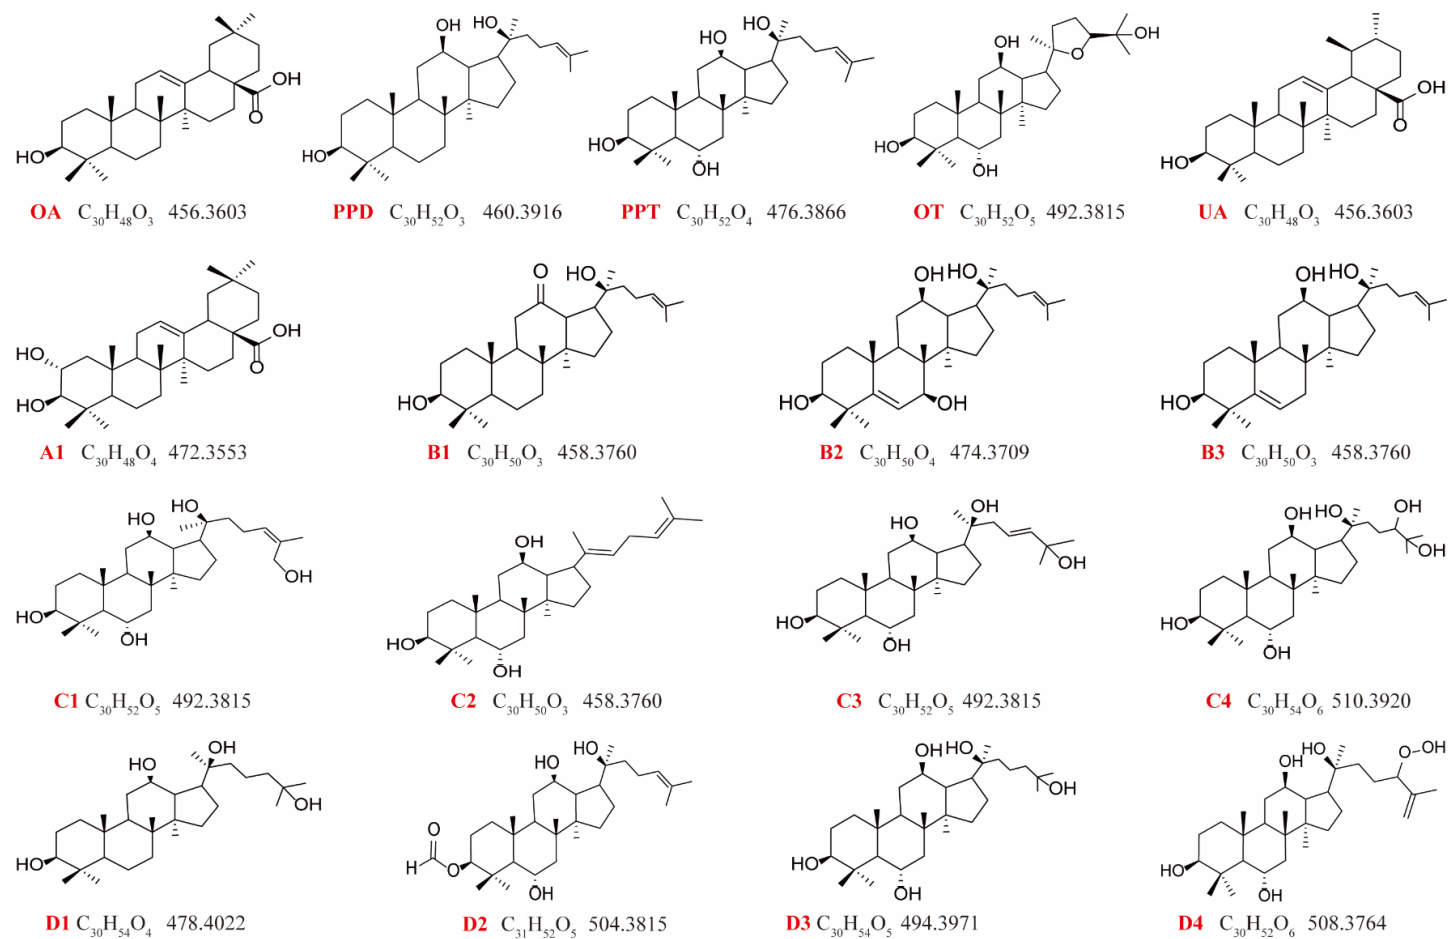

Supplement: s1 [file s1]
